# Supplementary material for: ZSWIM8 destabilizes many murine microRNAs and is required for proper embryonic growth and development
Source: Genome Res. 2023 Sep;33(9):1482–96. doi: 10.1101/gr.278073.123 (PMC10620050; doi:10.1101/gr.278073.123)
Supplement: Supplement 2 [file Supplemental_Table_S1.xlsx]

## Sheet: ZSWIM8-sensitive miRNAs
ZSWIM8-sensitive miRNAs and associated passenger strands in E18.5 embryonic tissues and mouse cell lines.
			Newly reported in this study?	Reported in Shi et al., 2020?	Fold change (Zswim8–/– vs. Zswim8+/– ) (log2)
miRNA	Clustered?	TS7 Annot.			Forebrain	Hindbrain	Eye	Heart	Lung	Liver	Stomach	Intestine	Kidney	Skin	Muscle	Placenta	MEF	iNeuron
miR-106a-3p	TRUE	Passenger			0.05	-0.28	-0.31		0.06			0.25	-0.32					0.01
miR-106a-5p	TRUE	Guide	TRUE	FALSE	0.52	0.66	0.71	1.35	0.96	-0.25	0.73	0.35	0.14	0.38	0.03	0.15		0.58
miR-1247-3p	FALSE	Passenger					0.01			1.1							0.51
miR-1247-5p	FALSE	Guide	FALSE	TRUE	1.36	0.49	0.62		1.29	0.97	-0.36	0.09	0.86	0.37	1.03	0.18	0.91	0.3
miR-139-3p	FALSE	Passenger			-0.12	-0.2	-0.13	-0.47	0.28	0.12	-0.39	-0.06	0.24	0.32	0.31	-0.05		0.26
miR-139-5p	FALSE	Guide	TRUE	FALSE	0.44	0.43	0.03	-0.17	0.32	0.11	0.19	0.04	0.12	-0.1	0.24	-0.07	0.74	0.64
miR-149-3p	FALSE	Guide			0.11	-0.14	-0.31	-0.16	-0.98		-0.55	-0.42	-0.13	-0.06	-0.42	-0.15
miR-149-5p	FALSE	Guide	TRUE	FALSE	0.75	1.04	0.43	-0.09	0.1	0.13	0.15	0.11	-0.06	0.05	0.11	-0.04	-0.04	0.85
miR-154-3p	TRUE	Guide	FALSE	TRUE	3.02	3.51	2.49	4.08	3.04	0.51	3.99	2.89	3.18	2.8	1.57	1.11	2.5	3.15
miR-154-5p	TRUE	Guide			-0.07	-0.01	-0.36	-0.13	-0.01	0.01	-0.38	-0.17	-0.23	-0.01	-0.04	0	-0.18	-0.17
miR-17-3p	TRUE	Passenger			0	-0.04	-0.06	-0.09	0.02	-0.17	0.11	-0.11	-0.06	-0.2	-0.13	-0.19	-0.23	-0.04
miR-17-5p	TRUE	Guide	FALSE	TRUE	0.29	0.33	0.53	0.39	0.55	-0.04	0.91	0.37	0.22	0.04	0.23	0.02	0.79	0.39
miR-193a-3p	FALSE	Guide	FALSE	TRUE	0.39	0.32	0.15	0.3	-0.13	-0.07	-0.21	-0.02	0	0.08	0.18	-0.18	0.5	0.68
miR-193a-5p	FALSE	Guide			0.39	-0.11	-0.2	-0.16	-0.24	-0.09	-0.44	-0.13	-0.08	0.13	0	-0.07	-0.04
miR-194-1-3p	TRUE	Passenger						-0.21			0.44	-0.08
miR-194-2-3p	TRUE	Passenger			-0.07	-0.58	0.15	-0.56	-1.39	-0.61	-0.22	0.07	-0.03
miR-194-5p	TRUE	Guide	TRUE	FALSE	0.04	0.05	-0.16	-0.04	-0.14	-0.19	-0.01	0.01	-0.08	0.11	-0.34	1.81	-0.06	-0.27
miR-195a-3p	TRUE	Passenger			0.11	-0.12	-0.46	0.04	0.13		0.2	0.34	-0.3	-0.02	0.21	0.24	-0.17
miR-195a-5p	TRUE	Guide	FALSE	TRUE	0.08	0	-0.15	0	0	-0.07	0.36	-0.01	0	-0.03	-0.05	-0.14	0.59	-0.03
miR-20a-3p	TRUE	Passenger			-0.03	0	0.13	-0.02	-0.05	-0.12	0.38	0.01	-0.06	-0.17	0.06	0.09	0.02	0.14
miR-20a-5p	TRUE	Guide	FALSE	TRUE	0.42	0.47	0.49	0.52	0.62	0.04	0.28	0.46	0.39	0.13	0.32	0.08	0.91	0.42
miR-20b-3p	TRUE	Passenger			-0.23	-0.21	-0.23		-0.12	-0.08		0.14	-0.03					0.22
miR-20b-5p	TRUE	Guide	TRUE	FALSE	0.56	0.63	0.75	1.34	0.98	0.05	0.77	0.45	0.08	0.37	-0.29	0.46		0.51
miR-212-3p	TRUE	Guide	TRUE	FALSE	0.03	0	0.65	0.6	0.59	0.59	0.93	0.61	0.35	0.57	0.71	0.16	0.28	-0.39
miR-212-5p	TRUE	Guide			0.01	-0.19	-0.1	0.33	0.62	0.19	0.17	0.32	0.03	-0.05	0.61	0.04	-0.09	-0.44
miR-297a/b/c-3p	TRUE	Guide			-0.2	0.04	0.43	-0.23	-0.02	0.48	1.03	-0.33	0.21	0.26	0.07	0.17
miR-297c-5p	TRUE	Guide	FALSE	TRUE	0.69	0.62	0.53	0.76	0.7	0.45	0.63	0.55	0.68	0.14	0.08	0.57	1.45	1.94
miR-29a-3p	TRUE	Guide	TRUE	FALSE	0.48	0.32	-0.11	0.05	0.06	-0.1	-0.37	-0.21	-0.11	0.1	-0.3	-0.23	0.12	0.36
miR-29a-5p	TRUE	Passenger			0.17	0.2	-0.13	-0.19	-0.16	-0.11	-0.43	-0.62	-0.01	0.13	-0.44	-0.47	-0.19	-0.05
miR-29b-1-5p	TRUE	Passenger			0.09	0.25	-0.72	0.09	-0.24	0		0.72	-0.62		-0.98	0.05	-0.35
miR-29b-2-5p	TRUE	Passenger			-0.11	-0.22	-0.32	0.03	-0.33		0.23	0.13	-0.03		-0.25	-0.16	-0.68	-0.38
miR-29b-3p	TRUE	Guide	FALSE	TRUE	1.64	1.37	0.82	0.87	0.73	-0.2	0.74	0.01	0.79	0.42	0.02	-0.35	0.7	1.49
miR-29c-3p	TRUE	Guide	TRUE	FALSE	0.46	0.41	0.31	0.14	0.52	-0.11	0.12	-0.06	0.2	0.08	-0.01	-0.17	0.08	0.54
miR-29c-5p	TRUE	Passenger			0.02	-0.21	-0.28	-0.28	-0.25	-0.06	-0.33	-0.13	0.11	0.26	0.29	-0.15	-0.67	0.01
miR-322-3p	TRUE	Passenger			-0.07	-0.05	-0.48	-0.19	-0.19	0.01	-0.09	-0.09	-0.11	-0.06	-0.08	-0.18	-0.04	-0.15
miR-322-5p	TRUE	Guide	FALSE	TRUE	0.94	1.08	1.03	1.44	0.48	1.35	2.51	1.89	0.81	1.69	1.51	-0.1	1.67	0.62
miR-33-3p	FALSE	Passenger			0.23	0.42	0.61	0.05	0.11	-0.09	0.56	0.03	-0.09	-0.02	0.02	0.2	0.33	0.2
miR-33-5p	FALSE	Guide	FALSE	TRUE	0.73	0.72	0.27	0.48	0.39	-0.08	-0.05	0.1	0.36	0.11	-0.23	0.2	1.09	0.91
miR-335-3p	FALSE	Passenger	FALSE	TRUE	2.88	3.24	3.6	3.39	2.96	2.73	4.15	2.91	2.38	3.51	3.74	2.43	2.88	2.53
miR-335-5p	FALSE	Guide			-0.18	-0.1	-0.18	0.06	-0.26	-0.03	0.04	-0.2	-0.13	0.11	-0.29	-0.1	-0.14	-0.31
miR-341-3p	TRUE	Guide	FALSE	TRUE	1.92	1.93	0.07	0.76	1.01	0.08	-0.02	0.28	0.29	0.24	0	0.55	1.04	1.94
miR-341-5p	TRUE	Passenger				0.7			0.35						0.56
miR-345-3p	FALSE	Guide	TRUE	FALSE	0.35	0.42	0.07	0.34	0.32	0.07	-0.22	0.15	0.28	0.42	0.2	0.08	0.4	0.49
miR-345-5p	FALSE	Guide			0.08	0.06	-0.08	-0.05	-0.03	-0.05	-0.21	-0.05	0.01	-0.06	-0.07	-0.27	0.03	0
miR-351-3p	TRUE	Passenger			0.23	-0.07	-0.3	-0.15	-0.13	-0.11	-0.08	-0.15	0.1	0.39	0.02	-0.01	-0.07
miR-351-5p	TRUE	Guide	TRUE	FALSE	0.33	0.3	-0.05	0.19	0.22	0.36	-0.07	0.29	0.19	0.3	0.26	0.24	0.21	0.77
miR-3544-3p	TRUE	miR-337-as			-0.04		0.35			-0.1					0.49	0.09
miR-3544-5p	TRUE	miR-337-as	TRUE	FALSE	4.68	3.4	2.65			2.7	1.99	2.41	0.6	4.08	3.31	2.87
miR-361-3p	FALSE	Passenger			0.01	-0.05	-0.15	-0.11	-0.03	-0.34	0.02	-0.02	-0.14	-0.03	-0.13	-0.06	-0.18	-0.15
miR-361-5p	FALSE	Guide	TRUE	FALSE	0.22	0.41	0.43	0.29	0.14	0.14	0.73	0.26	0.17	0.2	0.16	0.23	0.23	0.4
miR-369-3p	TRUE	Guide	TRUE	FALSE	0.56	0.75	-0.07	0.12	0.17	0.06	0.31	-0.05	-0.08	0.18	-0.05	0.1	0.65	0.38
miR-369-5p	TRUE	Guide			-0.26	-0.2	-0.28	-0.09	-0.03	0.03	-0.46	-0.07	-0.23	-0.16	-0.05	0.08	-0.26	-0.35
miR-376b-3p	TRUE	Guide	FALSE	TRUE	1.19	1.58	0.72	2.24	1.52	0.22	2.21	1.41	1.37	0.89	0.47	0.64	2.16	1.93
miR-376b-5p	TRUE	Guide			-0.1	-0.08	-0.76	-0.2	-0.13	-0.12	-0.04	0.17	-0.67	0.14	-0.32	0.05	-0.25	0.04
miR-379-3p	TRUE	Guide	TRUE	FALSE	0.78	0.81	0.28	0.74	0.56	0.15	0.95	0.55	0.4	0.47	0.41	0.2	0.86	0.4
miR-379-5p	TRUE	Guide			-0.16	-0.02	-0.41	-0.13	-0.12	-0.01	-0.61	-0.22	-0.38	-0.01	-0.11	-0.11	-0.33	-0.07
miR-380-3p	TRUE	Guide	TRUE	FALSE	0.3	0.46	0.13	0.7	0.49	0.04	0.58	0.33	0.18	0.34	0.28	0.16	0.67	0.4
miR-380-5p	TRUE	Passenger			-0.31	-0.25	-0.24	0.13	-0.01	0.03	-0.22	-0.09	-0.02	-0.03	-0.03	-0.01		-0.19
miR-409-3p	TRUE	Guide	FALSE	TRUE	1.51	1.64	0.72	1.12	0.93	0.32	0.68	0.81	0.57	0.93	0.74	0.53	1.17	1.22
miR-409-5p	TRUE	Guide			-0.11	-0.18	-0.23	-0.15	-0.01	0	-0.19	-0.16	-0.26	0.13	0.06	0.11	-0.3	-0.28
miR-411-3p	TRUE	Guide	TRUE	FALSE	0.79	0.84	0.27	0.77	0.64	0.2	1.04	0.64	0.39	0.5	0.42	0.28	0.72	0.31
miR-411-5p	TRUE	Guide			-0.2	0	-0.45	-0.13	-0.09	0	-0.12	-0.26	-0.32	-0.11	-0.14	-0.15	-0.17	-0.1
miR-411-5p.2	TRUE	Guide			-0.24	-0.15	-0.4	-0.13	-0.16	0	-0.2	-0.17	-0.23	-0.06	-0.11	-0.09	-0.16	-0.23
miR-425-3p	TRUE	Passenger			0.24	0.21	0.26	0.26	0.35	-0.12	0	0.09	0.38	0.05	0.18	0.11	0.36	0.22
miR-425-5p	TRUE	Guide	FALSE	TRUE	0.27	0.27	0.11	0.29	0.18	0	-0.29	0.17	0.14	0.13	0.18	0.09	0.6	0.29
miR-429-3p	TRUE	Guide			-0.16	-2.12	-0.2	-0.05	0	0.35	0.04	-0.02	0.05	-0.11	0.51	0.91		0.47
miR-429-5p	TRUE	Passenger	TRUE	FALSE	0.52				2.66		0.59	0.2	1.11	1.3
miR-431-3p	TRUE	Passenger			-0.1	0.03	-0.28	-0.4	0.14	0.12	0.52	-0.14	-0.11	0.3	0	-0.12		-0.1
miR-431-5p	TRUE	Guide	FALSE	TRUE	2.11	2.36	-0.08	0.18	0.28	0.05	0.26	0.13	-0.01	0.14	0.09	0.01	-0.26	1.66
miR-450b-3p	TRUE	Guide			0.14	-0.18	-0.41	-0.22	-0.12	-0.03	-0.01	-0.04	0.02	-0.1	-0.09	-0.02	0.13
miR-450b-5p	TRUE	Guide	FALSE	TRUE	2.76	2.35	0.98	2.2	1.39	1.09	1.42	1.39	1.36	0.92	0.77	0.32	1.91
miR-466i-3p	FALSE	Passenger	TRUE	FALSE	0.6	0.71	0.9	1.02	1.53	0.87	1.39	1.11	0.87	0.77	0.98	0.89	0.9	0.88
miR-466i-5p	FALSE	Guide			0.61	0.39	0.01	0.46	-0.55	0.3	-0.12	0.01	0.61	0.78	0.57	0.44	0.55	-0.03
miR-466j/miR-466m-5p/miR-669m-5p	TRUE	Guide			0.33	0.08	0.12	-0.23	0.02	-0.15	-0.05	-0.04	0.01	-0.58	-0.12	-0.07
miR-466m-3p	TRUE	Guide	TRUE	FALSE	0.77	0.19	0.59	0.02	0.07	0.06	0.84	0.52	0.37	0.24	0.06	0.25
miR-485-3p	TRUE	Guide	FALSE	TRUE	1.45	1.65	0.92	2.25	1.49	0.57	2.31	1.15	1.36	1.81	0.96	0.77	1.85	1.54
miR-485-5p	TRUE	Guide			-0.2	-0.26	-0.4	-0.31	-0.09	-0.08	-0.43	0.09	-0.24	0.06	0.06	0.19	0.23	0.03
miR-495-3p	TRUE	Guide	FALSE	TRUE	1.02	1.37	0.62	1.39	1.4	0.43	1.82	1.13	1.07	1.17	0.45	0.45	1.87	1.71
miR-495-5p	TRUE	Passenger			-0.25	-0.13	-0.22	0.08	-0.08	-0.17	0.17	-0.26	0.08	0.35	-0.12	-0.04		-0.22
miR-497a-3p	TRUE	Passenger	TRUE	FALSE	0.82	0.56	0.19	0.25	0.4	0.82	0.61	0.09	0.31	0.08	0.38	0.04	0.95
miR-497a-5p	TRUE	Guide			0.18	0.03	-0.34	-0.12	0	-0.26	-0.08	-0.15	-0.13	-0.21	-0.18	-0.45	0.42	-0.17
miR-503-3p	TRUE	Passenger			0.12	0.07	-0.44	-0.03	-0.03	-0.07	-0.26	-0.13	0.04	0.15	0	0	0.39
miR-503-5p	TRUE	Guide	FALSE	TRUE	1.59	1.5	0.54	1.31	0.82	1.24	1.24	1.45	1.28	0.77	0.41	0.47	1	1.45
miR-532-3p	TRUE	Guide			-0.01	-0.02	-0.01	-0.22	0.04	-0.01	0.12	0.08	-0.14	-0.19	0.1	0	0.07	0.24
miR-532-5p	TRUE	Guide	FALSE	TRUE	0.14	0.17	0.04	-0.11	0.11	0.01	0.37	0.07	-0.03	-0.16	0.11	-0.02	1.08	0.12
miR-543-3p	TRUE	Guide	FALSE	TRUE	1.82	2.17	1.25	2.14	2.26	0.96	2.54	1.94	1.72	1.68	0.95	0.86	2.41	2.44
miR-543-5p	TRUE	Passenger			-0.33	-0.11	-0.25	-0.27	-0.17	0	-0.59	-0.11	-0.71	0.09	0.06	0.04		-0.56
miR-544-3p	TRUE	Passenger	TRUE	FALSE	0.8	1.05	-0.03	-0.13	0.37	-0.17	0.05	0.02	-0.5	0.14	-0.02	-0.15		-0.09
miR-544-5p	TRUE	Guide			-0.3	-0.26	0.07	-0.47	0.16	-0.45	-0.86	-0.56		0.05	-0.25	0.15		-0.43
miR-551b-3p	FALSE	Guide	TRUE	FALSE	-0.02	0	0.15	0.03	-0.03	0.58	0.2	-0.3	0.16	0.51	-0.61	1.18		0
miR-551b-5p	FALSE	Passenger			-0.38	0.01	0.18		-0.49
miR-652-3p	FALSE	Guide			-0.09	-0.3	-0.26	-0.1	0.04	0.1	-0.29	0.07	0.09	0.33	-0.24	0.04	-0.03	-0.01
miR-652-5p	FALSE	Passenger	TRUE	FALSE	0.84	0.72	0.73	0.8	0.9	0.64	1.34	0.53	0.76	0.76	0.62	0.62	1	0.33
miR-665-3p	TRUE	Guide	FALSE	TRUE	1.63	1.78	0.44	1.4	1.89	0.37	1.45	1.31	1.43	0.78	0.42	0.57	1.89	2.02
miR-665-5p	TRUE	Passenger			-0.58	-0.07	-0.42	-0.11	-0.16	-0.28	-0.15	-0.35	-0.44	-0.15	-0.1	-0.44
miR-672-3p	FALSE	Passenger			-0.31	-0.09	0.3	-0.29	-0.03		0.07	0.32	-0.17		-0.27	0.02	-0.09	-0.66
miR-672-5p	FALSE	Guide	FALSE	TRUE	2.14	2.28	1.37	1.27	1.07	0.65	0.46	0.82	0.71	0.79	1.08	0.66	1.45	1.56
miR-673-3p	TRUE	Passenger			-0.36	-0.19	-0.69	0.4	-0.04	0.2	-0.12	-0.52	-0.6	-0.34	0.23	-0.18
miR-673-5p	TRUE	Guide	TRUE	FALSE	1.16	1.09	0.29	1.42	1.11	0.67	1.05	0.85	0.67	0.47	0.58	0.35	0.56	1.1
miR-744-3p	FALSE	Passenger	TRUE	FALSE	0.68	0.9	0.56	0.46	0.4	-0.03	0.57	0.34	0.52	0.16	0.81	0.17	0.33	0.63
miR-744-5p	FALSE	Guide	FALSE	TRUE	0.55	0.7	0.24	0.21	0.18	0.06	0.08	0.21	0.15	-0.04	0.1	0.15	0.17	1.11
miR-758-3p	TRUE	Guide	TRUE	FALSE	1.42	1.39	0.47	0.48	0.41	-0.29	0.08	0.32	0.05	0.22	0.04	0.2		1.03
miR-758-5p	TRUE	Passenger			-0.35	-0.14
miR-764-3p	TRUE	Guide			-0.14	-0.11
miR-764-5p	TRUE	Passenger	TRUE	FALSE	0.65	1.11
miR-7a-1-3p	FALSE	Passenger			-0.25	-0.17	0.22	-0.17	0.01	-0.07	0.15	0.16	-0.26	-0.16	-0.13	-0.19	-0.11	-0.24
miR-7a-2-3p	FALSE	Passenger			0.04	0.17	0.18				0.75	0.22	0.17					-0.32
miR-7a-5p	FALSE	Guide	FALSE	TRUE	1.55	2.1	2.76	3.63	3.9	1.73	1.61	2.18	3.25	2.77	3.12	1.7	3.28	2.4
miR-7b-3p	FALSE	Passenger			-0.15	-0.47	0.12					-0.45
miR-7b-5p	FALSE	Guide	FALSE	TRUE	1.26	1.48	3.31	2.1	2.06	1.35	-0.05	0.78	-0.79	2.53	1.42	1.73		2.39
miR-92a-1-5p	TRUE	Passenger			-0.08	-0.34	-0.18	0.02	-0.05	0.06	-0.27	-0.05	-0.08	-0.23	-0.15	-0.33	-0.35	-0.47
miR-92a-2-5p	TRUE	Passenger
miR-92a-3p	TRUE	Guide	FALSE	TRUE	1.18	1.58	0.33	0.26	0.54	0.26	0.75	0.47	0.36	0.17	0.57	0.16	0.41	0.68
miR-92b-3p	FALSE	Guide	TRUE	FALSE	0.62	0.71	0.62	0.66	0.28	0.72	0.58	0.32	0.29	0.56	0.1	0.47	0.28	0.25
miR-92b-5p	FALSE	Passenger			0.04	0.04	0.49		0.13		0.06		-0.13			0.2	-0.34
miR-93-3p	TRUE	Passenger			-0.01	0.04	0.04	-0.11	0.01	-0.09	0.01	0.07	-0.03	0.11	0.09	0.26	0.07	0.33
miR-93-5p	TRUE	Guide	FALSE	TRUE	0.14	0.16	0.25	0.05	0.29	-0.08	0.73	0.15	0.06	-0.08	0.12	-0.07	0.53	0.23
miR-99b-3p	TRUE	Passenger	TRUE	FALSE	0.21	0.22	0.19	0.21	0.37	0.31	0.59	0.34	0.13	0.21	0.07	0.08	0.29	-0.17
miR-99b-5p	TRUE	Guide			-0.12	-0.08	0.05	-0.12	0.05	0.08	0.18	-0.02	-0.04	0.06	-0.1	0.19	-0.14	-0.13
Legend:
Column 2 (Clustered?) indicates whether a miRNA is produced from at least one locus found within a genomic miRNA cluster.
Column 3 (TS7 annot.) indicates whether a a miRNA is annotated by TargetScan7 Mouse as a guide strand or passenger strand.
Column 4 (Newly reported in this study?) indicates whether a miRNA was reported to be ZSWIM8-sensitive for the first time in this study.
Column 5 (Reported in Shi et al., 2020?) indicates whether a miRNA was previously reported to be ZSWIM8-sensitive in cultured mouse cells (Shi et al., 2020; PMID 33184237).
Black bounding lines group together ZSWIM8-sensitive miRNAs and respective cognate strands that are co-produced from their annotated precursors.
Intensity of green fill indicates magnitude of fold change.
Black fill indicates contexts with insufficient read depth for accurate quantification.
miRNAs listed in red were identified as ZSWIM8-sensitive by BBUM analysis (FDR-adjusted p value < 0.05) and significant elevation over cognate (passenger) strands in at least one context.
miRNAs listed in orange were identified as ZSWIM8-sensitive by greater fold change than their cognate strands in 11 of 12 embryonic tissues, and overall increase in level across all tissues (median magnitude > 0.2 log2 units).
miRNAs listed in blue were identified as cognate strands of ZSWIM8-sensitive miRNAs, referred to in this work as passenger strands.
Fold changes listed in red indicate contexts in which miRNAs were identified as ZSWIM8-sensitive.
Fold changes listed in pink indicate contexts in which miRNAs were identified as marginally ZSWIM8-sensitive.
Fold changes listed in blue indicate contexts in which the cognate miRNA was identified as ZSWIM8-sensitive or marginally ZSWIM8-sensitive.
Fold changes listed in purple indicate contexts in which miRNAs were identified as secondarily ZSWIM8-sensitive.
See Main Text and Methods sections for additional details.

## Sheet: Secondarily sensitive miRNAs
Secondarily ZSWIM8-sensitive miRNAs and associated passenger strands in E18.5 embryonic tissues and mouse cell lines.
	Fold change (Zswim8–/– vs. Zswim8+/– ) (log2)
miRNA	Forebrain	Hindbrain	Eye	Heart	Lung	Liver	Stomach	Intestine	Kidney	Skin	Muscle	Placenta	MEF	iNeuron
miR-155-3p									-0.25			0.55
miR-155-5p	0.33	0.18	0.6	0.58	0.45	0.04	0.58	0.29	0.45	0.58	0.33	0.06	0.54
miR-192-3p	-0.03	0.54	-0.38	-0.28	-0.29	-0.26	0.41	-0.04	-0.07	0.47	-0.79	1.23	0.24
miR-192-5p	0.03	0.02	-0.29	-0.08	-0.16	-0.21	0.18	-0.03	0.03	0.09	-0.31	1.78	0.05	0.05
miR-200a-3p	-0.18	-2.37	-0.22	-0.19	-0.03	0.31	0.09	-0.05	-0.04	-0.2	0.12	0.81		0.56
miR-200a-5p	-0.15		0.09		0.01	0.06	0.31	-0.1	-0.14	-0.1		0.95
miR-200b-3p	-0.22	-2.28	-0.2	0.14	-0.08	0.3	0	0.02	0	-0.14	0.67	0.91		0.14
miR-200b-5p	-0.58	-1.62	-0.3		-0.04	0.47	0.64	-0.05	0	-0.13		1.04
miR-215-3p				0.38			1.25	0.26				1.92
miR-215-5p			-2	0.14	-0.22	-0.44	0.51	0.08	-1.55	2.46		2.09
miR-27a-3p	0.43	0.04	-0.07	-0.04	-0.19	0	-0.01	-0.22	-0.1	-0.33	-0.38	-0.24	0.15	0.42
miR-27a-5p	-0.18	0.06	-0.42	-0.52	-0.34	0.29	-0.85	-0.46	-0.11	-0.14	-0.21	-0.31	-0.16
miR-31-3p	-0.18	-0.2	-0.03	0.06	-0.18	-0.14	0.11	0.06	-0.04	0.03	0.78	0.56	-0.32	-0.05
miR-31-5p	-0.17	-0.18	-0.2	0.29	-0.14	-0.18	-0.22	0.04	0.02	0.17	0.77	0.62	-0.32	-0.27
miR-410-3p	0.17	0.27	0.02	0.71	0.57	0.15	0.4	0.3	0.28	0.35	0.12	0.26	0.73	0.21
miR-410-5p	-0.53	0.01	-0.11	0.45	0.6	0.29	-0.34	0.05	0.73	-0.22	0.12	0.22
miR-455-3p.2	-0.1	-0.08	0.01	0.3	0.09	-0.14	0.51	0.06	0.01	0.12	0.06	0.68	0.11	0.39
miR-455-5p	-0.17	-0.15	-0.45	0.17	-0.01	-0.15	-0.05	-0.12	-0.22	-0.09	-0.44	0.36	0.06	-0.27
miR-463-3p												1.48
miR-463-5p												2.25
miR-465a-3p/miR-465b-3p/miR-465c-3p												1.88
miR-465a-5p												2.52
miR-465b-5p												1.93
miR-465c-5p												2.33
miR-470-3p												0.92
miR-470-5p												1.83
miR-471-3p												2.3
miR-471-5p												2.28
miR-486a-3p/miR-486b-3p	-0.21	-0.34	-0.34	-0.76	-0.53	0.05	0.5	0.14	0.16	1.1	0.19	0.12
miR-486a-5p/miR-486b-5p	0.1	0.22	-0.15	-0.52	-0.45	0.12	-0.29	0.58	0.1	0.73	0.7	-0.37
miR-741-3p												2.26
miR-741-5p												2.73
miR-742-3p												2.05
miR-743a-3p												2.33
miR-743a-5p												2.34
miR-743b-3p												2.41
miR-871-3p												2.37
miR-871-5p												2.22
miR-878-3p												2.06
miR-878-5p												2.28
miR-880-3p												2.1
miR-881-3p												2.14
miR-883a-3p												2.47
miR-883b-3p												2.16
Legend:
Black bounding lines group together secondarily sensitive miRNAs that are co-produced from their annotated precursors.
Intensity of green fill indicates magnitude of fold change.
Black fill indicates contexts with insufficient read depth for accurate quantification.
miRNAs listed in purple were initially identified as secondarily sensitive by BBUM analysis (FDR-adjusted p value < 0.05) and lack of significant elevation over cognate (passenger) strands. In addition, they were also not identified as ZSWIM8-sensitive in any tissue.
miRNAs listed in blue were identified as cognate strands of secondarily sensitive miRNAs, which were then also categorized as seondarily sensitive do to lack of significantly different fold-change.
Fold changes listed in purple indicate contexts in which miRNAs were initially identified as secondarily sensitive.
See Main Text and Methods sections for additional details.

## Sheet: Suspected false positives
Suspected false-positive ZSWIM8-sensitive miRNAs and associated passenger strands in E18.5 embryonic tissues and mouse cell lines.
	Fold change (Zswim8–/– vs. Zswim8+/– ) (log2)
miRNA	Forebrain	Hindbrain	Eye	Heart	Lung	Liver	Stomach	Intestine	Kidney	Skin	Muscle	Placenta	MEF	iNeuron
miR-122-3p						-0.07	0.72	-1.38	-1.04			-0.93
miR-122-5p	-0.1	0.18	-1.4	1.56	1.38	-0.09	0.91	-1.02	-1.28	3.1	-0.05	-0.85
miR-135b-3p	0.02	0.34	0.23		0.37		0.26							0.15
miR-135b-5p	-0.04	0.06	0.03	0.33	0.04	-1.04	0.07	-0.32	0.46	0.9	-0.65	-0.07	-0.92	-0.13
miR-429-3p	-0.16	-2.12	-0.2	-0.05	0	0.35	0.04	-0.02	0.05	-0.11	0.51	0.91		0.47
miR-429-5p†	0.52				2.66		0.59	0.2	1.11	1.3
miR-451a	0.14	0.24	-0.16	-1.74	-0.59	-0.09	0.01	0.48	-0.08	1.19	1.97	-0.07	-0.01
Legend:
Black bounding lines group together ZSWIM8-sensitive miRNAs and respective cognate strands that are co-produced from their annotated precursors.
Intensity of green fill indicates magnitude of fold change.
Black fill indicates contexts with insufficient read depth for accurate quantification.
Dagger next to miR-429-5p indicates that this miRNA was identified as ZSWIM8-sensitive.
miRNAs listed in magenta ("suspected false positives") were initially nominated as ZSWIM8-sensitive by BBUM analysis (FDR-adjusted p value < 0.05) and significant elevation over cognate (passenger) strands in at least one context, but then manually removed from the set of ZSWIM8-sensitive miRNAs.
miRNAs listed in blue were identified as cognate strands of suspected false-positive miRNAs, referred to in this work as passenger strands.
Fold changes listed in red indicate contexts in which miRNAs were initially nominated as ZSWIM8-sensitive.
Fold changes listed in pink indicate contexts in which miRNAs were identified as marginally ZSWIM8-sensitive.
Fold changes listed in blue indicate contexts in which the cognate miRNA was initially identified as ZSWIM8-sensitive or marginally ZSWIM8-sensitive.
See Main Text and Methods sections for additional details.

## Sheet: miRNA levels in E18.5 tissues
miRNA	Forebrain (CPM)		Hindbrain (CPM)		Eye (CPM)		Heart (CPM)		Lung (CPM)		Liver (CPM)		Stomach (CPM)		Intestine (CPM)		Kidney (CPM)		Skin (CPM)		Muscle (CPM)		Placenta (CPM)
	Zswim8+/–	Zswim8–/–	Zswim8+/–	Zswim8–/–	Zswim8+/–	Zswim8–/–	Zswim8+/–	Zswim8–/–	Zswim8+/–	Zswim8–/–	Zswim8+/–	Zswim8–/–	Zswim8+/–	Zswim8–/–	Zswim8+/–	Zswim8–/–	Zswim8+/–	Zswim8–/–	Zswim8+/–	Zswim8–/–	Zswim8+/–	Zswim8–/–	Zswim8+/–	Zswim8–/–
mmu-let-7a-1-3p/mmu-let-7c-2-3p	151.015	150.686	146.895	138.764	135.646	132.803	208.498	190.809	270.754	255.653	102.013	95.0517	206.439	191.479	208.934	175.791	279.738	258.979	229.275	214.528	173.808	129.815	213.241	189.123
mmu-let-7a-2-3p	8.12949	8.07138	6.3614	6.84109	4.11556	3.42697	1.23281	1.11378					2.55054	2.14815	1.91184	1.68723	1.4181	2.12782	4.82356	3.83808	1.74691	2.31767
mmu-let-7a-5p	14826.6	13344.6	14210.2	12503	22023.8	19779.9	20311.5	19814.4	28700.2	26373.9	11852	12554.4	30739.4	25819.6	21148.4	20999.9	28456.9	28569.1	20169.8	20799.1	15871.2	14871.7	19111.3	21480.7
mmu-let-7b-3p	71.6219	69.4777	54.9697	49.2919	25.8977	25.2086	37.897	28.0516	58.2265	52.9681	9.89661	9.51833	56.0396	44.6962	35.2733	35.3827	68.4336	61.6569	64.6812	67.5315	38.5629	34.6143	41.1539	34.9087
mmu-let-7b-5p	14020.8	13304	9307.45	7909.01	5004.65	3933.99	5654.46	5445.35	12260.4	11989.9	1012.12	1119.75	11708	9140.32	5438.03	5351.37	10347.3	10455.2	9416.14	9125.59	6367.02	6231.08	6560.54	7199.61
mmu-let-7c-1-3p	20.638	19.5034	15.0308	12.6624	9.94538	9.09023	10.4471	9.28119	6.28425	6.13536	2.49574	2.44961	11.6145	13.114	5.64482	5.00759	7.42915	7.27727	9.48811	7.68319	7.9455	8.67467
mmu-let-7c-5p	34076.4	31073	26605.4	23174.1	11527.5	10261.2	11431.6	11205.8	16615.7	15981.2	2142.83	2318.73	21554.3	18015.1	8783.09	8371.96	14767.5	15054.8	12789.6	13523.6	11568.9	10570.8	7451.42	7990.21
mmu-let-7d-3p	420.826	411.109	326.387	317.248	674.681	611.364	993.136	1006	1216.87	1211.3	372.124	407.793	1267.54	1185.19	1011.4	1083.39	1159.28	1224.78	1008.21	988.768	828.752	892.445	647.522	629.265
mmu-let-7d-5p	3482.88	3113.33	3047.84	2509.09	5930.91	5348.74	9217.38	9400.99	12103	11256.8	2981.57	3023.31	9418	10056	9061.71	9392.02	11384.5	10955.5	7802.96	7484.69	6086.4	6213	7577.99	8604.22
mmu-let-7e-3p	34.5331	36.273	38.1052	37.7117	54.8563	53.3918	42.2788	39.1443	48.4205	56.1759	14.5984	18.9972	49.6111	53.0043	40.7544	44.6162	69.0853	69.0324	35.5651	35.2712	36.1027	31.0301	25.7837	26.6315
mmu-let-7e-5p	5402.58	5002.39	5947.92	5501.87	8036.64	7814.84	5284.19	5309.68	7190.61	7064.13	2151.33	2416.96	9753.7	7654.6	5072.04	4938.1	8481.52	8717.7	4443.36	4562.61	4130.75	3440.71	2971.29	3590.54
mmu-let-7f-1-3p	12.9658	12.3433	11.2742	9.45571	23.7153	18.3223	37.8769	34.8247	58.5982	58.3042	14.5399	14.7823	45.248	51.8444	52.372	56.1513	64.6779	61.8838	52.803	53.0232	33.5772	31.3056	38.8774	40.3417
mmu-let-7f-2-3p	41.6298	46.5254	43.9716	41.4092	36.8541	32.9709	26.8513	26.6783	45.4956	43.6337	19.6317	15.9911	44.9092	40.1526	40.959	36.0708	56.2119	54.8684	41.1139	39.8403	19.1834	14.0826	42.4335	34.6314
mmu-let-7f-5p	9795.5	8799.73	8556.82	7362.9	13139.3	11024.8	13707.6	13485.3	24918.3	22825.1	6522.66	6820.79	25247.9	19749.7	18460.8	17944.5	24434.5	23150.7	16516.8	14944.9	10681.9	9943.13	18594.4	19707.7
mmu-let-7g-3p	1.80382	1.69757	1.74484	1.56857	2.72462	2.22364	4.1763	4.49507	0.962523	1.69994	2.10021	2.86132	2.0133	1.93552	1.63946	2.12505	1.90628	2.01703			2.75085	2.21893	5.93145	6.60318
mmu-let-7g-5p	7347.44	6904.3	7375.31	6598.35	9111.84	8130.71	9515.81	9754.49	10565.7	10014	5663.42	5750.66	11222	10552.5	10998.6	10793.8	12543.6	12363.9	8548.54	7977.71	5826.87	5424.74	7934.2	8107.47
mmu-let-7i-3p	222.769	217.001	238.803	193.135	353.613	284.155	375.156	345.944	480.621	441.598	100.278	78.7467	496.363	318.473	306.693	233.388	452.81	403.418	444.025	366.11	292.328	241.419	356.042	302.855
mmu-let-7i-5p	6073.09	5838.57	5890.34	4989.43	11201.2	9218.88	10859.4	11156.6	14185.8	13077.7	3056.61	2968.55	16559.7	11421.7	9394.02	8650.01	14033.2	13299.1	13458	12071.6	8752.09	8195	9616.3	9508.65
mmu-let-7j	0.797863	1.21804	1.09319	0.820413	2.64042	2.54728	1.84828	3.14902	2.98707	2.5322			3.35557	1.7323	1.15516	1.07237	2.76144	2.70558			1.95098	2.12836	2.19299	2.55575
mmu-miR-100-3p	8.8444	7.09545	12.0492	11.4418	5.80893	4.67986	2.38606	3.19949	0.82889	1.03909			2.41628	3.07056	4.18949	2.21855	3.81618	3.23345			4.24686	3.3423	0.560741	0.839758
mmu-miR-100-5p	2751.4	2483.01	3079.27	2808.02	1754.37	1464.76	493.046	574.269	160.488	241.104	63.9393	69.9314	1084.76	915.517	704.724	664.134	812.493	790.076	1461.42	1442.26	886.348	693.163	120.113	139.37
mmu-miR-101a-3p.1	2341.47	2387.05	2169.66	2195.81	1444	1349.59	896.857	855.823	876.103	731.187	488.722	458.258	998.431	840.533	751.599	593.147	1296.49	1222.44	560.682	558.118	653.656	514.844	2164.56	1836.83
mmu-miR-101a-3p.2	2644	2379.47	2716.45	2509.14	1637.86	1511.09	1026.32	1118.98	694.701	627.618	447.361	438.868	968.894	772.082	700.115	575.911	1127.04	1067.6	444.382	524.303	619.486	559.821	2232.9	2000.61
mmu-miR-101a-5p	31.6147	32.041	31.9012	28.6879	20.955	22.4148	15.3427	16.9253	11.7003	11.8949	6.33125	6.38254	15.3709	14.5429	12.0313	9.33129	17.748	19.7447	9.88233	9.97606	11.7902	10.4045	39.5869	31.1618
mmu-miR-101b-3p.1/mmu-miR-101b-3p.2	455.483	427.871	457.953	441.08	647.603	622.037	536.383	587.083	507.311	536.751	4086.18	4344.16	770.667	720.547	686.444	690.1	754.555	763.438	550.303	546.031	461.165	429.966	655.661	635.466
mmu-miR-101b-5p	0.70611	1.09267	0.977276	1.36065	1.34244	1.45559	1.10691	1.36491	1.39306	2.07449	12.7962	12.8666			2.77447	1.86924	2.35164	2.89639			1.29904	1.97961	1.88433	2.08504
mmu-miR-101c	20.2754	19.1007	18.1878	18.7141	12.3103	13.069	7.42261	6.70376	8.97704	6.0777	4.11406	5.08345	7.18185	7.81095	5.8491	6.626	10.2264	9.878	4.6856	5.18981	5.39873	4.82822	20.0236	15.5422
mmu-miR-103-1-5p	22.5531	24.3297	26.1141	26.9867	19.9918	23.5617	15.5243	17.9014	14.615	15.5444	12.4285	10.4245	30.0036	23.8924	64.6275	61.1386	23.5307	23.4063	17.3089	17.1086	14.7845	11.6475	18.3611	14.5445
mmu-miR-103-2-5p	41.232	45.1381	45.4846	50.9256	63.7927	67.43	56.9134	57.363	63.6991	64.2145	43.266	43.1624	74.2298	61.2769	75.2942	72.7921	82.6076	73.7221	47.4157	46.7093	47.8194	41.2498	45.6645	44.4267
mmu-miR-103-3p/mmu-miR-107-3p	8146.03	7720.71	9243.57	8864.24	8796.71	9404.2	8334.56	8570.71	7523.71	7494.74	5248.18	5234.93	5894.57	7257.23	13502.4	14102.2	8779.29	8502.54	6714.12	6667.01	3477.7	3106.53	5946.71	6091.27
mmu-miR-106a-3p	1.71353	1.73518	2.24925	1.82556	2.10493	1.68359			2.99012	3.13313					5.19839	5.98647	4.87431	3.87211
mmu-miR-106a-5p	45.6312	63.9587	51.4695	78.4365	75.4873	124.898	4.35322	11.7476	89.0857	172.593	76.1674	64.5039	9.74179	15.8628	355.148	442.347	294.971	317.767	11.7311	14.7386	23.494	21.4894	4.17288	4.66289
mmu-miR-106b-3p	185.697	198.849	162.989	161.578	377.001	383.907	245.276	246.541	312.053	319.611	298.402	295.705	344.049	300.222	319.968	302.305	479.134	426.715	260.921	241.83	206.991	206.632	149.501	165.124
mmu-miR-106b-5p	6619.25	6158.7	5419.79	4872.51	9083.06	8429.15	4228.13	3984.41	6520.27	6532.39	3944.3	3612.7	6140.65	5646.07	5421.13	5102.52	10184.2	9684.08	4836.81	4022.88	1635.82	1556.02	2191.07	1981.84
mmu-miR-107-5p	23.4284	23.1081	31.9049	34.0968	23.8656	25.8337	78.3649	80.933	28.9626	30.2544	41.9123	37.7744	17.3873	21.0438	24.7861	21.4075	37.9543	34.8265	18.9933	16.2707	17.4376	17.433	3.10797	3.5038
mmu-miR-10a-3p			34.2767	23.5921			2.70807	5.35257	41.7476	46.3433	9.81583	7.54244	42.9369	57.8165	77.4032	71.7844	521.316	499.361	39.1626	21.3205	2.89802	3.33413	11.7135	12.2848
mmu-miR-10a-5p	10.8357	4.02199	1876.61	1193.18	9.1229	9.709	153.423	238.499	2274.96	2317.27	319.02	356.763	3613.11	2911.31	4176.06	3837.37	25588.4	24262.7	2014.98	1278.8	182.657	185.018	591.391	595.626
mmu-miR-10b-3p			6.66821	5.71626									2.55101	4.14314	12.8735	11.186	79.4945	72.8053	16.4272	10.4199	3.74919	3.03333	6.25549	7.08051
mmu-miR-10b-5p	15.3458	6.98343	1531.58	1084.53	319.926	63.5584	208.396	228.132	77.5283	60.9374	17.4869	26.8666	786.336	582.542	2886.25	2424.24	15813.2	15061.3	4520.39	4235.69	1130.83	889.487	2074.86	2178.03
mmu-miR-1187			0.42177	0.51297	0.706583	1.09169			0.479991	0.916692							0.698401	1.91409					3.41882	4.20433
mmu-miR-1188-3p			0.345405	0.768262																	1.35034	1.79719
mmu-miR-1188-5p	9.53804	7.9511	18.8277	14.9392	19.49	19.7445	5.4269	5.92833	9.43865	11.0418	32.751	30.4838	14.8906	12.1291	12.4045	9.12482	2.67943	3.03542	14.5877	19.8383	50.0141	47.2558	27.4451	26.0956
mmu-miR-1191a	7.07249	10.9086	8.34592	12.5349	11.9843	14.6132	11.2034	16.8601	12.4757	14.93	11.2475	11.9153	9.67196	12.2822	13.6809	20.0505	13.4475	16.6452	10.9177	10.8638	7.35307	8.90711	8.65059	10.686
mmu-miR-1193-3p	57.5658	49.2177	56.9683	48.7892	149.326	120.211	63.2239	57.0178	208.059	191.553	548.037	555.646	174.799	160.876	158.428	134.66	46.6993	36.453	232.744	214.899	460.092	433.809	175.461	149.068
mmu-miR-1193-5p	0.282591	0.319298			0.908655	0.865969			1.52567	1.47229					1.19303	1.584					3.40354	3.97427	1.42354	1.21324
mmu-miR-1195	0.46903	0.617048			1.09456	0.627591	0.716565	0.564242									1.74951	0.953436					1.16706	1.1392
mmu-miR-1197-3p	17.9101	15.7761	22.5447	17.8388	22.7663	18.9981	9.33407	8.79902	16.6809	14.7733	69.1259	53.711	30.0739	22.8476	24.2493	16.5377	7.29731	4.84062	32.7191	24.7883	74.965	64.4112	43.6956	38.9683
mmu-miR-1198-3p			0.72958	0.537852	1.41317	0.97883			0.893673	1.01458
mmu-miR-1198-5p	134.827	144.616	137.468	144.77	150.873	146.693	84.5444	85.627	122.235	139.677	100.487	104.623	133.821	136.86	116.99	117.084	178.601	189.621	100.343	102.265	57.4875	56.357	81.832	85.9441
mmu-miR-1199-5p									2.89934	2.5016					1.78573	1.16587	3.71628	4.5199					9.9802	8.68491
mmu-miR-122-3p											9833.28	9486.98	4.7665	8.07106	3.51617	1.40199	3.19615	1.51081					2.32811	1.24969
mmu-miR-122-5p	12.1191	11.0238	8.48122	9.29517	34.7598	13.3599	16.5877	50.4465	10.5103	27.6152	176856	168517	93.9668	175.739	72.86	34.8772	65.1907	26.0765	18.561	152.057	29.7788	29.5784	36.2979	20.4139
mmu-miR-1224-3p	3.60211	3.26545	13.4841	9.72803	4.0718	2.2755							1.81345	1.95734	3.27892	4.00902
mmu-miR-1224-5p	33.5646	24.9534	106.046	99.6963	21.9459	22.3209							25.9608	16.6474	16.5283	20.5816	1.78168	1.74429
mmu-miR-1231-3p	0.885218	0.482276	0.747006	0.614885			1.47525	1.40901															2.25615	2.63973
mmu-miR-124-3p.1	154805	146205	180261	164252	62148.5	65870.2	365.651	369.004	142.913	111.689	7.72952	22.7306	1495.82	1123.98	1414.35	1237.57	129.875	50.7914	298.628	913.864	56.0776	119.882	2268.47	2044.08
mmu-miR-124-3p.2	28536.4	27157.2	34674.9	31649.4	11363.4	11814.3	63.9102	67.9423	26.4065	22.5305			268.489	197.214	242.181	214.825	23.7751	8.51621	50.4921	168.956	10.1414	20.8179	585.568	562.508
mmu-miR-124-5p	357.409	347.978	322.551	319.043	262.863	260.069							3.21968	3.11762	3.15799	2.73991							3.41662	2.50603
mmu-miR-1247-3p					5.3287	5.53089					0.988828	2.18452
mmu-miR-1247-5p	32.0088	80.63	9.36196	12.5983	1041.38	1618.99			37.143	89.8827	146.145	291.802	187.675	144.438	61.6267	63.1944	18.8845	33.7377	101.49	123.315	35.6117	67.2656	116.559	133.588
mmu-miR-1249-3p	113.925	117.648	137.307	125.848	91.7703	124.217	38.1179	31.2131	63.2833	49.0694	20.6594	34.0425	68.9576	100.799	75.1497	85.9778	66.8354	73.0946	78.5372	98.4936	52.1441	77.569	50.7777	71.0524
mmu-miR-1249-5p	1.27056	1.19766	0.957891	0.897446	1.65363	1.77114									1.8639	1.90863	0.776782	1.10753			0.649705	0.598297
mmu-miR-1251-3p	1.56894	1.10324	2.14762	2.22367	1.56675	1.16306
mmu-miR-1251-5p	321.74	277.758	509.378	492.27	272.56	283.118	2.16561	1.59815					4.89864	4.16496			39.622	42.1711	2.45449	5.39991	8.17397	3.61529
mmu-miR-125a-3p	51.3576	51.6314	53.2801	55.5072	79.0035	78.755	50.7409	49.5332	72.1436	78.1041	20.2027	22.3511	93.0666	84.382	51.4141	54.4	94.0814	97.63	48.9845	47.4797	48.5359	39.2636	49.784	54.6751
mmu-miR-125a-5p	12053.8	11763.4	13530.4	12759.1	12755.4	14491.4	9274.36	8791.65	12785.4	12676.1	3830.41	4272.38	11827.3	12497.2	9083.65	8728.97	14800.4	14268.1	7883.64	8124.91	7772.76	6381.32	6301.37	7136.76
mmu-miR-125b-1-3p	306.754	293.222	268.659	272.828	149.793	134.712	41.9614	40.7501	16.2539	15.5506	4.96362	4.07768	146.725	102.327	61.3968	55.0339	75.2926	73.8366	70.4443	81.6696	96.8447	86.5066	8.83511	6.5623
mmu-miR-125b-2-3p	247.134	258.78	240.275	260.95	133.567	118.857	109.8	114.021	58.3855	63.2388	24.7122	22.6274	142.67	158.356	53.3439	52.26	61.5531	67.0148	89.0343	95.3306	113.396	97.6107	17.8965	13.3069
mmu-miR-125b-5p	114220	105367	100294	93980.3	38144.4	36350.4	15573.2	15167.2	8913.71	8794.44	2450.46	2573.95	36057.5	31598.1	15933.5	14431.6	17789.4	16841.7	20851.3	22934.5	27275.7	23875.7	2994.13	2922.94
mmu-miR-1264-3p	84.6654	68.2169	208.821	168.588													0.791053	2.11149
mmu-miR-1264-5p	14.4958	11.5649	36.2184	28.8453
mmu-miR-126a-3p.1	2552.4	2130.99	3365.12	2784.61	5534.96	4170.64	15190.4	13407.3	25448.1	21122.3	6129.45	5615.49	7197.71	5004.18	8889.13	7298.06	16770.4	15519.8	7596.96	5988.98	5050.37	3948.96	6886.02	5993.25
mmu-miR-126a-3p.2	1360.1	1170.08	1784.14	1538.12	2404.73	1911.94	8057.01	7344.08	13258.1	11111.3	3688.45	3249.5	3199.53	2231.15	3898.23	3384.38	7785.4	7684.56	3112.25	2657.14	1975.12	1636.33	4278.75	3626.86
mmu-miR-126a-5p	1475.37	1223.76	1837.9	1669.53	2303.31	1961.74	9196.91	8067.01	14866	12440.7	3781.4	3535.85	2196.72	2502.34	4155.03	3513.84	8538.23	7980.05	3586.04	2995.88	2308.9	1806.57	4478.98	3933.73
mmu-miR-126b-3p									0.719223	0.773471	3.22831	4.08894	1.74503	1.07258	2.25231	1.70693							0.717267	0.739212
mmu-miR-126b-5p																							0.562939	0.606619
mmu-miR-127-3p	3100.56	3040.45	4362.49	4453.1	11859.9	8811	2587.77	2583.28	6435.7	6468.99	12072	12838.2	11475.5	7941.11	6455.8	6074.53	1686.06	1320.47	12087.8	11517.7	34272.7	34340	7283.85	7385.18
mmu-miR-127-5p	446.206	418.282	719.196	671.917	822.603	607.842	176.723	170.33	433.037	414.759	819.507	777.049	692.183	519.424	426.163	343.529	122.445	101.832	796.209	720.019	2313.63	2022.49	565.726	495.333
mmu-miR-128-1-5p	3.41974	2.72011	1.62775	1.73558	2.09483	2.55185	2.75814	1.85663									1.68541	1.4223			1.05039	0.990953
mmu-miR-128-2-5p	32.2742	25.1669	15.1271	11.1429	1.96348	1.49813															2.90213	3.02287
mmu-miR-128-3p	8494.64	7974.82	6574.04	5873.66	1131.3	1177	614.211	601.698	202.362	197.279	332.858	292.581	276.863	353.319	330.033	320.839	318.961	330.416	513.124	409.574	1981.69	2186.7	119.684	135.329
mmu-miR-129-1-3p/mmu-miR-129-2-3p	986.112	821.721	1621.56	1410.72	113.436	121.263	38.7928	40.4598	45.9921	35.5436	3.4567	2.85569	97.317	56.9951	71.726	56.6389	37.4817	36.7863	24.1836	20.0247	14.8822	10.9263	6.90357	10.4782
mmu-miR-129-5p	348.258	335.759	603.629	571.017	50.854	45.346	17.7906	17.2805	26.1077	24.2155			51.2637	28.4295	33.697	30.6558	22.1699	23.4655	7.74453	7.60612	4.84041	4.80501	1.22803	3.08833
mmu-miR-1291	0.732164	0.889337			1.33503	1.06058	0.855573	1.13902	1.45936	1.10029	1.82166	2.81057			2.14391	2.36117	2.91118	1.73113			0.649331	0.848077
mmu-miR-1298-3p	8.19992	5.90094	18.1036	14.0909
mmu-miR-1298-5p	327.424	393.989	838.64	1002.12	2.35146	2.9859											1.33972	4.36454			0.94816	1.42775
mmu-miR-129b-3p											1.96094	3.53999
mmu-miR-129b-5p											3.46785	3.94795
mmu-miR-1306-3p	3.2942	3.32618	3.12842	3.18451	7.96037	7.20182	5.15075	3.66818	5.82518	6.2552	4.18927	4.22054	6.30722	5.91908	4.1391	5.54886	6.01445	5.83799			4.94563	4.32866	2.29514	1.28506
mmu-miR-1306-5p	63.7039	60.6502	61.3762	55.5232	134.448	147.87	96.0965	88.0077	99.6031	103.734	67.8863	71.2248	78.6251	89.4698	95.8715	104.625	127.507	116.075	92.8538	82.0032	73.5826	74.4001	34.3579	35.2004
mmu-miR-130a-3p	7963.24	7547.41	8816.79	7758.12	19252.9	16946.8	11499.7	10960.3	18414.6	16931	7546.95	6682.36	14152	12138.4	10643.5	9113.49	22337.6	20637	8496.07	7215.02	8325.32	6355.57	2366.9	2078.52
mmu-miR-130a-5p	40.6463	42.5986	47.0407	44.3166	119.857	115.633	71.774	61.8203	118.165	114.935	53.1793	47.5089	84.1265	75.9327	71.0341	60.0712	172.593	160.661	65.5826	61.6852	51.1541	44.4702	11.3565	10.6241
mmu-miR-130b-3p	965.569	946.288	977.713	945.47	2151	2190.93	906.522	950.51	1046.82	1081.12	655.289	593.909	1190.21	1205.2	1839.61	1760.03	2944.04	2893.22	675.609	628.82	538.336	479.93	148.224	150.485
mmu-miR-130b-5p	184.107	176.306	200.009	194.547	455.861	419.903	123.337	114.158	161.39	171.081	101.506	106.123	227.785	192.166	297.954	308.334	532.424	549.419	109.498	97.4265	82.7833	83.2738	16.9294	22.3852
mmu-miR-132-3p	550.379	491.885	738.71	641.896	133.065	159.259	177.22	227.273	155.451	200.037	46.9455	54.6547	187.002	274.139	234.917	248.731	356.592	400.482	116.448	137.233	92.0728	97.1255	171.331	174.182
mmu-miR-132-5p	23.7609	22.1232	34.2186	29.4701	6.26361	5.7531	8.09003	9.52914	6.31948	8.17061			12.2803	12.1573	11.678	10.6597	17.349	16.6452	3.87226	4.88954	4.24873	4.42969	8.2222	7.76668
mmu-miR-133a-3p.1	32.8689	22.1111	121.008	97.3693	5155.33	4456.13	51043.2	46327.1	381.388	355.39	14.0218	12.1784	1211.78	1048.72	980.684	875.651	59.6579	65.5927	3573.92	2019.57	24996.6	27296.7	26.8217	25.163
mmu-miR-133a-3p.2/mmu-miR-133b-3p	36.4714	29.046	166.752	130.951	11942.4	9612.93	45508.7	43411.8	346.757	347.442	20.7986	27.9889	1265.28	1157.43	1043.45	968.269	72.7894	73.9567	7809.1	3974.23	53418.5	52089.1	31.3676	31.8821
mmu-miR-133a-5p					30.9724	22.7121	223.459	177.948	1.39966	1.01217			8.58807	6.7602	5.94743	5.72092			18.7332	11.8951	178.626	167.225
mmu-miR-133b-5p					16.4541	12.189													6.97846	6.24127	69.3824	69.2823
mmu-miR-134-3p	22.1046	18.3065	34.5477	29.5907	25.0052	24.5223	9.03032	8.2169	28.3675	31.2563	30.7761	29.6905	34.9088	35.7095	31.0059	24.8315	9.92351	7.07479	32.9688	33.7058	64.7694	57.8175	16.5158	16.2151
mmu-miR-134-5p	554.375	608.775	964.243	1085.78	909.9	795.411	246.986	284.977	826.459	986.36	922.587	935.616	1352.85	1039.12	848.23	839.175	300.329	253.578	1152	1159.14	2222.9	2037.99	937.303	923.055
mmu-miR-135a-1-3p	58.1783	63.8591	83.4836	99.6357	13.6818	19.0965							4.63084	3.7491	2.96623	4.69291	1.18658	1.58298
mmu-miR-135a-2-3p	54.4807	53.906	110.367	126.3	35.3973	38.2733											4.85302	5.9679
mmu-miR-135a-5p	16705	15359.8	30814.7	30931.4	8889.8	9129.71	113.752	133.073	51.9061	49.4013	57.3324	50.5187	360.459	400.722	316.252	242.783	1433.13	1464.99	88.6376	238.09	435.402	141.748	24.8089	27.4469
mmu-miR-135b-3p	24.9507	24.7297	26.5527	32.2834	7.02546	8.53769			4.2072	5.3973			0.805507	1.03193
mmu-miR-135b-5p	6623.58	6323.58	7725.26	7774.92	1393.14	1437.14	15.472	19.1462	1733.46	1775.3	2.94419	1.54534	198.907	204.821	52.0571	40.1096	252.905	339.779	38.7424	69.7524	43.2896	24.6871	20.3076	19.425
mmu-miR-136-3p	496.736	448.221	851.052	738.55	641.809	500.021	177.644	171.757	422.397	395.854	1219.71	1136.12	490.516	469.139	457.745	345.856	108.856	85.3224	800.727	753.887	2387.54	1956.52	620.39	550.587
mmu-miR-136-5p	1648.5	1469.74	2763.35	2378.26	2788.19	1896.19	701.012	628.329	1647.5	1408.92	4593.67	4048.16	2692.82	1709.6	1712.37	1192.12	386.476	290.346	2895.27	2597.98	7883.72	5303.25	2516.13	2104.1
mmu-miR-137-3p	6758.64	6396.5	4367.39	4578.22	122.928	124.401	14.4858	24.6316	44.4127	49.6026			892.026	762.158	867.531	721.59	49.6639	10.1488	39.1549	67.5462	25.7625	23.9967	1.9129	0.820977
mmu-miR-137-5p	30.6458	32.0493	14.5315	14.4866					0.392257	0.373278			7.38005	5.59392	7.13038	5.93734
mmu-miR-138-1-3p	1.40562	1.85506	1.89914	2.06621
mmu-miR-138-2-3p	26.2278	23.9422	40.3959	37.0901	8.59016	9.5246	8.23185	6.62806	2.42087	1.54085			5.50806	4.58081	6.0256	4.44684	3.64877	2.3613			1.95248	2.18755	3.22111	3.25408
mmu-miR-138-5p	3007.88	2886.28	4615.55	4330.58	672.098	684.047	212.227	238.455	104.051	108.829	28.7316	22.8511	577.234	395.725	820.422	754.086	170.242	115.992	309.979	257.124	115.956	115.007	267.966	239.101
mmu-miR-139-3p	31.4315	28.2808	23.568	19.6753	19.1425	17.7949	13.1383	9.78663	10.288	12.3917	30.3945	33.5237	16.1708	12.245	20.9423	19.5337	31.0599	35.7914	12.1739	15.3392	21.8604	26.1842	21.211	20.7675
mmu-miR-139-5p	565.038	748.044	458.768	597.276	510.397	526.434	491.491	449.432	350.612	435.96	956.439	1044.85	323.313	360.727	584.949	587.919	950.35	1012.79	508.725	457.055	835.919	946.442	1031.52	992.163
mmu-miR-140-3p.1	569.909	633.549	712.016	792.925	1495.49	1350.15	835.099	967.648	1314.4	1300.29	808.541	845.749	501.773	515.246	869.225	830.779	1169.63	1087.77	452.157	444.712	10107.9	5541.47	629.895	585.866
mmu-miR-140-3p.2	381.822	376.205	483.902	483.943	776.864	669.855	443.236	454.332	716.408	667.209	428.403	417.524	257.675	252.386	455.79	410.49	626.427	550.103	251.052	254.305	4987.98	2510.67	346.909	325.59
mmu-miR-140-5p	403.571	381.332	542.407	515.263	778.777	586.347	406.397	404.404	692.457	597.911	335.521	312.704	292.198	227.12	397.637	337.493	576.431	469.84	222.21	193.62	3214.94	1934.95	300.748	257.771
mmu-miR-141-3p	236.456	213.564	82.2706	16.0258	730.13	517.033	10.924	13.3517	6540.19	6033.47	81.6072	78.1318	10776.2	8437.31	13805.8	12364.7	2627.59	2504.12	4774.83	3591.92	9.5628	7.29693	6421.36	6090.02
mmu-miR-141-5p	0.906874	0.491678			3.69793	3.12636			29.3361	26.9069			37.2287	51.699	84.0643	75.4041	12.6847	12.7835	26.0808	18.2432			30.7502	36.1319
mmu-miR-142a-3p.1	176.608	176.19	283.527	276.62	724.408	492.516	1967.32	941.682	2169.81	1508.63	16771.4	15572.2	748.839	610.112	1550.44	1246.37	827.415	793.558	2230.35	2623.95	857.9	1181.12	2780.57	2378.81
mmu-miR-142a-3p.2	199.44	192.093	323.24	302.23	891.415	564.798	2285.65	1068.56	2526.58	1668.47	18440.9	16596	1036.74	700.747	1832.27	1368.14	961.607	887.351	2755.87	3147.3	1001.45	1275.67	3412.37	2723.39
mmu-miR-142a-5p	51.7987	48.2555	90.2702	83.8703	199.791	156.354	615.232	267.803	638.855	400.182	3614.98	3070.49	155.372	176.589	393.65	321.212	246.518	229.178	627.781	722.178	228.921	334.68	834.386	704.646
mmu-miR-143-3p	1000.26	961.359	1440.34	1461.08	4792.26	3871.62	24714	25079.2	14564.5	16754.1	2894.13	2753.65	80078	45237.9	54803.6	48814	14832.6	14480.5	3517.8	6127.15	4662.24	5573.13	5920.79	5539.16
mmu-miR-143-5p	24.0141	24.2553	33.3901	32.6628	139.157	104.084	645.652	638.646	510.524	453.28	69.7219	71.6629	2479.54	1485.05	1198.15	969.732	351.045	323.059	155.106	126.384	132.63	126.755	188.718	161.45
mmu-miR-144-3p	499.248	538.17	718.631	764.086	1950.14	1359.95	9177.27	2590.91	7105.03	4203.95	43776	37296.8	1052.24	714.328	1094.87	1198.85	2715.36	2617.52	1950.98	4435.57	1225.06	3697.46	10813.5	8457.99
mmu-miR-144-5p	14.5597	13.9703	20.5598	21.6638	56.6439	40.6744	267.071	77.1332	208.019	123.127	1405.91	1307.56	24.7074	23.3327	30.6663	35.4522	81.0322	80.9905	68.0303	147.021	35.8577	130.701	355.54	320.948
mmu-miR-145a-3p	11.3018	10.4044	16.6072	16.3772	65.5418	54.3764	237.184	235.409	273.302	233.564	34.4668	33.8227	1062.97	736.662	551.091	494.938	182.39	171.875	87.1277	78.0285	62.2038	61.0941	81.2378	71.4527
mmu-miR-145a-5p	516.361	544.488	765.138	798.714	2612.37	2353.2	13035.1	13693.7	12180.8	11208.1	1741.97	1869.69	43811	38542.9	30247.4	25940.5	8216.84	7784.92	3860.08	3765.09	2651.09	2835.65	4272.33	4025
mmu-miR-146a-3p									5.42682	4.8478							0.894353	1.29898
mmu-miR-146a-5p	98.832	82.3584	148.08	137.855	223.542	171.835	140.754	158.198	2016.13	1692.47	637.045	655.632	333.063	259.949	285.665	257.821	373.188	339.129	313.725	320.064	137.402	118.413	438.994	510.941
mmu-miR-146b-3p	1.73446	1.72186	1.64635	1.84227													1.20787	0.770474
mmu-miR-146b-5p	183.743	175.98	221.485	216.456	100.728	84.5115	59.5948	58.4072	152.691	130.779	307.363	287.541	80.4082	65.5963	71.0781	70.8406	124.476	121.029	56.5267	68.9332	82.8273	55.0523	87.7306	85.9772
mmu-miR-147-3p	6.55429	6.48272	7.67449	7.07935	8.80098	7.57715	4.43419	3.17009	8.81428	7.81079	31.2162	38.2952	339.851	179.151	63.4177	47.768	6.09646	6.25507	7.87064	5.10315	5.3935	3.90692	613.82	518.125
mmu-miR-147-5p													4.09595	2.08569									14.8511	13.7102
mmu-miR-148a-3p	416.611	380.138	709.93	679.155	2718.76	2090.31	3769.68	3566.07	2353.12	2152.91	5644.95	5047.42	4035.05	4522.55	3227.53	3281.36	2623.12	2281.59	6835.6	6672.7	4162.7	3083.63	2715.11	2628.39
mmu-miR-148a-5p	2.0365	2.05996	3.27958	2.96058	13.8064	10.8601	13.164	15.5719	11.0516	11.0748	33.0825	25.9193	36.1643	29.3986	19.7318	16.4245	15.4638	14.0746	40.2112	37.2673	20.7551	13.0929	6.47241	7.55343
mmu-miR-148b-3p	610.86	543.261	726.121	653.331	808.67	788.258	699.897	652.329	855.675	786.046	894.332	824.584	728.488	828.396	965.421	950.912	1068.66	949.104	723.651	697.781	510.69	448.25	672.393	651.487
mmu-miR-148b-5p	7.57344	7.83436	8.5521	8.9908	13.8656	12.4701	12.7882	12.9462	16.0106	16.0474	22.7318	19.1983	14.9063	16.5755	22.8617	18.5351	21.778	21.6484	18.36	12.7294	13.3895	12.3632	14.7863	14.9422
mmu-miR-149-3p	62.4909	65.8958	77.0588	67.4926	26.7735	22.0444	15.0881	13.937	2.68254	1.3744			11.2707	7.59832	8.45715	6.17346	9.79506	8.76603	10.7719	10.6633	14.896	10.5706	6.3049	5.75678
mmu-miR-149-5p	2710.79	4448.96	3278.98	6497.07	1160.69	1578.08	1087.81	1047.57	240.409	257.44	85.9415	94.6249	690.568	754.632	592.894	624.46	678.313	637.202	606.652	615.175	973.352	1003.93	480.202	472.101
mmu-miR-150-3p	1.24084	0.543004	1.70607	0.829273					2.86004	1.6131													0.969352	0.912687
mmu-miR-150-5p	327.442	230.82	470.854	373.308	97.1784	61.8244	83.5536	70.0396	661.134	451.018	146.494	118.565	157.922	136.486	235.284	236.78	170.159	118.537	290.98	221.626	67.4749	50.756	519.254	486.934
mmu-miR-151-3p	210.487	240.648	198.74	236.226	376.416	363.686	317.827	327.021	624.587	628.89	167.482	190.084	563.854	444.331	436.627	455.177	644.85	634.931	347.618	351.573	252.86	221.977	506.378	504.642
mmu-miR-151-5p	992.266	916.383	1055.23	942.293	1430.52	1298.89	1259.31	1173.11	2309.36	2183.93	621.807	602.583	1492.18	1453.77	1544.63	1536.04	2291.94	2205.17	1213.45	1143.2	856.72	779.045	2048.07	2020.19
mmu-miR-152-3p	214.593	185.678	370.228	344.886	2404.54	2150.13	2137.09	2129.19	2394.97	2393.03	1076.67	1043.04	1797.63	2722.61	1737.21	1586.05	2542.4	2167.72	2953.82	3092.37	4016.27	3009.64	3882.26	3819.33
mmu-miR-152-5p	1.61885	1.55065	3.06792	2.80004	14.6086	12.0037	12.3173	11.7778	16.5498	16.3034	5.34243	7.43343	14.7674	13.2047	9.50146	11.0579	17.8941	14.0517	16.9856	16.3907	21.8256	15.5522	21.9337	20.9322
mmu-miR-153-3p	6831.4	6365	8191.28	8587.58	2217.72	2611.47	32.0737	29.6282	107.922	78.9251			225.736	189.149	112.631	108.677	22.3162	20.6479	13.8243	34.4148	35.4373	23.2058	21.2357	14.866
mmu-miR-154-3p	588.913	4684.81	708.353	7776.01	1119.81	6385.2	122.544	2144.16	654.037	5357.89	8774.85	12621.5	375.786	5840.14	642.212	4644.3	132.499	1165.01	1322.14	8836.29	6764.19	19642.2	2553.1	5548.11
mmu-miR-154-5p	798.262	746.158	1123.85	1074.82	1276.57	1007.29	378.384	359.683	933.94	922.875	2118.99	2165.45	1278.71	970.939	902.122	779.839	238.755	198.42	1488	1423.85	3284.32	3059.3	848.95	859.766
mmu-miR-155-3p																	1.26134	1.04853					0.612916	0.912687
mmu-miR-155-5p	20.3437	25.0823	39.4237	43.0643	45.7286	70.3696	62.9202	96.0727	26.8846	36.4216	44.5361	46.6347	39.0034	57.5102	31.4001	37.2715	215.365	287.242	34.0094	49.1352	24.5675	28.6139	320.471	338.634
mmu-miR-15a-3p	43.4905	51.7678	23.2888	28.2952	67.9889	81.4198	60.7798	57.4713	110.637	113.461	89.465	83.4203	53.2648	56.246	72.9157	70.3716	96.2039	89.9055	79.0901	63.7111	69.5128	58.0404	31.8315	27.1332
mmu-miR-15a-5p	6226.15	6189.9	3120.42	2847.07	7795.3	7043.76	4282.87	3638.34	10420.6	9161.81	6994.68	6514.62	4588.75	4003.73	5124.29	5133.82	8395.58	7800.67	5555.24	5126.51	2586.29	2298.26	3373.06	3057.86
mmu-miR-15b-3p	45.575	54.94	41.147	43.3104	141.011	158.781	139.916	118.705	175.661	170.482	160.254	161.091	103.659	113.797	167.588	138.566	194.758	185.858	148.483	150.019	84.7523	87.5002	70.3562	57.927
mmu-miR-15b-5p	3608.5	3476.47	2676.9	2642.93	6782.94	7689.11	4862.79	4453.89	8660.92	8199.19	6645.12	6813.66	3137.02	4521.89	4977.72	5556.11	8968.3	8374.74	5973.13	5670.47	1726.29	1911.18	2949.81	2909.84
mmu-miR-16-1-3p	15.5727	17.8094	9.30342	8.33024	39.6085	33.8346	29.8533	24.9288	46.6417	39.8261	52.859	48.4602	40.3292	27.0849	35.9749	32.7855	46.6731	46.2593	36.6149	36.2289	27.861	21.7349	8.49789	7.50152
mmu-miR-16-2-3p	25.7191	24.7274	21.0366	21.8188	60.4105	66.5738	71.9093	61.797	79.5604	68.6265	99.6567	94.23	63.9254	69.7296	82.2917	66.7963	85.8433	84.3588	79.1754	77.2738	46.0722	38.0354	45.1636	40.2191
mmu-miR-16-5p	18126.5	17113.6	10028.2	8892.29	25566.3	23639.7	17375	15220.7	32052.5	28507.8	21195.7	21404.4	16319.8	14150.8	17183.7	17811.8	28067.2	25752.3	18904.8	18214.3	8769.85	8045.28	12724.3	12813.7
mmu-miR-17-3p	497.16	488.254	447.185	419.223	878.284	851.747	467.429	450.476	678.725	686.953	538.667	483.796	635.568	671.981	693.524	626.293	1139.73	1068.77	661.553	558.656	382.752	327.502	500.17	443.048
mmu-miR-17-5p	7044.52	8410.29	4735.55	5731.15	11512.5	16858.7	6466.48	8664.71	7913.66	11532.5	6816.25	6706.58	5956.44	10923.5	8897.45	11196.7	19697.1	22499.8	9287.26	9302.63	2794.58	3103.61	7050.43	7225.35
mmu-miR-181a-1-3p	277.922	248.276	196.555	183.372	231.078	232.933	50.8158	46.2399	125.168	114.067	14.9299	11.1125	56.9323	59.0945	52.4608	45.599	123.239	111.589	42.529	43.2949	43.0993	29.5686	15.8057	13.3014
mmu-miR-181a-5p	22730.4	23464.3	17356.2	17989.1	23153.3	25220.9	7924.39	8937.11	14130.8	15223	1925.44	1953.92	8907.12	10398.3	7721.91	7882.75	13931.1	12830.7	5750.76	5919.15	7682.07	6224.09	2145.91	2044.72
mmu-miR-181b-1-3p	18.3725	14.9772	12.7819	10.057	19.849	28.2938	4.01716	3.3487	12.2946	10.4812			5.84028	6.65409	6.1569	7.42785	15.4928	16.4406	6.67361	6.80857	4.09782	5.03616	0.81942	0.767937
mmu-miR-181b-2-3p	2.46809	2.05722	2.97922	2.81367	5.82107	9.40488	4.03682	2.6279	2.22449	2.44536			2.81763	3.42395	2.50209	1.93807	8.26302	6.337			2.44716	2.98919
mmu-miR-181b-5p	6500.67	7356.17	5472.6	6714.17	9261.62	10776.4	3172.67	3842.59	5444.71	6601.27	750.719	781.811	2728.86	4324.23	3115.72	3459.21	5923.33	6176.84	2501.26	2740.12	2967.95	2492.48	571.745	607.714
mmu-miR-181c-3p	390.296	364.933	381.444	377.144	230.027	230.99	81.7484	81.78	159.626	179.835	21.406	18.5422	141.813	124.363	102.492	90.9578	209.765	211.801	111.155	96.6456	57.4516	45.9431	6.98537	4.95902
mmu-miR-181c-5p	4975.33	4934.88	4852.55	4445.97	4335.15	4107.76	1948.89	1956.16	3193.74	3087.76	452.979	444.786	2854.3	2599.64	2246.47	1919.87	3954.6	3338.57	2101.17	1760.27	1594.29	1287.32	163.092	137.623
mmu-miR-181d-3p	8.10084	6.60732	6.82978	6.23167	7.25513	8.71841	4.03729	3.665	4.75604	4.07064			3.49053	4.31813	2.86027	2.2824	11.8189	11.9816			1.99855	2.54423
mmu-miR-181d-5p	2554.49	2804.86	2670.71	2993.25	2672.96	2492.73	1099.1	1152.31	1694.36	1897.77	237.747	237.464	1560.32	1531.44	1240.68	1198.05	2556.43	2576.01	1311.31	1230.53	816.9	651.739	77.8179	73.7963
mmu-miR-182-3p					59.4381	44.627			2.44331	1.51025			13.889	8.37698	5.98529	4.01399	2.64387	1.92725					8.18264	6.32695
mmu-miR-182-5p	182.06	167.683	346.641	231.763	6739.81	7110.45	12.945	11.6359	1179.66	1003.15	200.539	143.128	1745.11	1736.97	1445.53	1406.21	958.864	825.226	1811.98	1573.23	30.5572	30.0677	7593.01	7241.51
mmu-miR-183-3p	0.374344	0.276203	1.34285	1.19534	28.2076	28.2131			2.59532	2.61422			7.92481	9.03969	4.06338	4.15164	3.1035	2.63151	7.40284	7.90992			23.9817	27.8325
mmu-miR-183-5p	75.3075	69.7847	169.406	114.388	2380.86	2593.13	4.73467	4.34586	422.916	342.402	83.2758	63.9361	676.804	789.364	638.086	592.018	371.986	339.82	753.149	722.992	11.2371	12.6372	2451.66	2650.54
mmu-miR-183-5p.2	22.6306	20.0558	64.6156	45.1008	1011.47	1080.19	1.94891	1.76524	161.789	141.466	37.4222	27.692	332.002	318.141	267.098	254.659	161.622	142.814	268.399	278.975	4.64231	4.86649	1137.79	1201.66
mmu-miR-1839-3p	30.6847	28.1687	42.4615	37.726	37.3236	36.2876	39.6929	40.7739	31.1332	29.8282	30.8819	34.4355	36.5304	40.0178	46.9446	43.0125	38.507	35.5416	33.0291	32.6947	23.7856	20.227	28.1991	28.1475
mmu-miR-1839-5p	198.403	175.109	256.831	234.017	199.567	223.597	201.564	205.418	159.468	154.494	146.076	157.501	263.406	211.507	194.996	206.386	199.814	191.635	139.602	156.443	116.769	107.998	116.805	124.041
mmu-miR-184-3p	1.73299	1.69483	10.5382	9.46048	4798.09	5249.82	15.2552	17.7911	8.65872	9.3039	4.34245	6.13997	5.30069	4.88115	11.7211	9.59726	4.16186	3.73777	3.11804	9.11455	3.60351	7.83935	11.7959	14.4571
mmu-miR-184-5p					11.3936	10.608
mmu-miR-1843a-3p	6.3899	6.13247	9.78021	9.04057	7.41407	8.73915	9.03593	10.5493	6.01953	5.67878	4.85221	3.62272	4.0983	9.18386	8.90084	6.15377	5.84705	6.73242	4.83277	5.10315	3.4968	4.50063	4.04273	4.39328
mmu-miR-1843a-5p	20.256	20.7324	30.4042	27.7656	23.2082	22.0233	25.6031	28.3983	16.6497	16.3989	13.0971	14.1863	18.8591	23.0889	19.323	19.43	18.7066	17.3966	13.2684	14.3114	13.1929	14.4961	14.0949	16.7698
mmu-miR-1843b-5p	14.7631	13.2918	20.5099	20.0577	16.5741	14.6188	13.0559	13.5472	9.07799	8.22331	8.74346	8.97314	17.51	10.8161	10.2102	8.61817	8.54777	11.23			7.33925	6.14677	11.6998	12.1456
mmu-miR-185-3p	9.34568	8.90822	8.96389	8.02858	8.96198	8.47089	11.7159	11.6852	7.93441	6.53668	18.0857	16.2261	6.17249	6.41964	11.6579	10.1825	5.06686	5.36659	5.58173	7.26907	3.44588	3.28999	7.80479	9.13019
mmu-miR-185-5p	659.847	606.358	687.042	630.387	563.757	533.326	709.88	741.759	514.564	463.487	1088.84	1083.53	574.543	390.049	969.255	961.004	430.7	409.346	447.378	460.819	254.735	256.429	515.443	577.129
mmu-miR-186-3p	26.3368	25.4008	33.4577	25.7556	34.1438	26.7988	15.2945	15.0549	21.0727	19.1009	17.81	16.2787	33.6086	20.8466	27.7648	25.038	38.1609	31.3516	17.6636	12.2357	9.29023	5.45203	9.93242	8.2109
mmu-miR-186-5p	447.418	428.226	501.033	510.136	772.007	738.467	623.872	672.14	612.12	589.818	534.249	554.802	580.881	506.992	718.893	697.715	845.828	848.472	486.717	507.516	394.322	355.075	658	647.064
mmu-miR-187-3p	155.147	172.363	133.93	119.971	63.8115	60.3609	43.1807	39.6174	165.664	185.677	148.424	119.048	66.7023	57.9933	52.5185	48.477	370.374	343.634	57.8262	53.0372	16.1708	11.7708	227.022	199.829
mmu-miR-187-5p	2.89161	4.21003	3.85095	2.96058			1.33625	1.05915	3.17888	4.0314	3.14753	2.22213	1.27621	1.14445	1.33929	1.14617	8.75097	8.71337					8.00251	6.40982
mmu-miR-188-3p	32.3561	30.3509	25.2588	23.0735	44.3127	37.8926	67.0417	55.6134	21.3971	21.3532	13.4591	12.6447	29.7266	19.3205	36.1844	34.0199	24.9701	19.8995	37.151	31.617	125.761	106.233	19.822	16.3688
mmu-miR-188-5p	341.805	373.525	274.43	297.758	548.983	552.245	837.59	855.002	337.186	377.148	175.301	176.163	288.26	385.651	593.347	554.09	346.252	327.398	538.019	467.044	1465.18	1429.84	237.523	228.154
mmu-miR-18a-3p	58.9024	68.1914	55.9769	73.2833	111.313	120.123	48.5584	58.6123	79.5985	86.8621	81.0196	74.8776	101.861	85.5205	96.6483	99.6066	136.945	133.085	82.6969	95.1729	44.8895	47.0785	38.5994	40.302
mmu-miR-18a-5p	3036.06	3105.22	2998.38	3014.25	6364.99	5788.5	3323.4	3311.47	4899.79	4875.96	4271.77	3721.16	5276.49	4442.06	6055.85	5436.67	8021.31	7515.47	4534.84	3623.45	3033.28	2591.27	1986.04	1724.84
mmu-miR-18b-3p	1.26983	1.59923	1.53592	2.48373	1.23467	1.74811			1.72256	2.91525					5.41275	5.00759	3.51692	2.9711
mmu-miR-18b-5p	21.8113	19.8066	28.7863	29.1361	13.2062	14.1939	2.28449	3.20267	27.0127	23.9929	12.3979	8.69304	3.82439	2.27008	50.3875	50.4596	32.8233	27.8194	2.90519	4.58574	4.54382	2.97286	0.77164	1.46959
mmu-miR-190a-3p	6.01883	4.76909	9.63139	6.87006	8.41971	7.82133	19.4072	17.4244	4.89069	3.73646	2.28126	2.49848	8.1959	8.71154	7.09252	5.78477	8.86877	7.64129	6.76298	8.42381	6.3439	8.18786	4.84896	3.71705
mmu-miR-190a-5p	243.215	234.271	351.281	317.554	465.877	394.545	1083.73	1088.82	209.35	214.54	187.344	196.565	711.38	459.127	382.938	322.896	412.088	426.875	331.46	303.733	485.433	398.929	164.731	157.564
mmu-miR-190b-3p					2.50639	2.23172
mmu-miR-190b-5p	6.21626	5.07233	7.48652	6.5875	132.916	111.334	3.81685	3.34551	6.25978	5.5724	3.1893	4.08706	7.51242	4.98426	5.7633	6.60133	7.92458	8.12522	7.35557	8.76087	9.8478	7.09946	10.5333	10.2915
mmu-miR-191-3p	4.749	3.89739	4.51083	3.94869	9.64365	8.61364	6.29089	6.24978	8.78676	8.58186	8.00531	8.52945	11.274	10.197	11.678	12.2192	10.1299	9.28985	6.53434	7.73308	4.24649	5.10939	9.61058	10.2738
mmu-miR-191-5p	1864.58	1717.99	1960.68	1851.6	2822.56	3265.76	2509.74	2662.97	3110.39	3044.23	2738.64	2831.44	2209.9	3073.91	4125.42	4302.54	3603.66	3478.07	2749.02	2726.21	1998.94	2027.83	4462.67	4745.97
mmu-miR-1912-3p	1.38837	1.24899	4.91831	3.50082
mmu-miR-1912-5p	53.2255	47.8743	138.696	121.497													1.14377	1.21705
mmu-miR-192-3p	2.08861	2.00198	2.07243	2.91081	4.65105	3.53754	2.64394	2.2381	4.07458	3.31913	156.557	131.585	68.0253	88.7185	755.947	715.765	21.6706	20.3119	2.66865	3.94488	2.24682	1.20706	2.46046	5.78553
mmu-miR-192-5p	70.9917	71.0741	87.7142	85.5455	138.243	114.376	85.8914	83.5254	106.887	95.6862	5606.74	4917.29	2548.53	2844.94	26820.5	25576.2	669.557	666.949	101.551	106.073	60.3084	45.6658	65.8967	228.53
mmu-miR-1927	1.53369	1.85115	1.30643	1.33816			3.14288	2.77392	1.63585	1.59837			2.08007	1.30703	2.17169	2.39061
mmu-miR-1930-5p	7.96358	6.41416	8.10977	5.58644	8.59016	9.37254	10.0427	10.0503	7.43604	8.36638	7.48165	7.48606	6.91381	9.85941	9.57445	8.8887	9.38889	9.09246	7.7169	5.93748	7.09732	7.45486	8.94825	10.7688
mmu-miR-1933-3p							1.00768	0.618877
mmu-miR-1934-3p					1.50612	1.40373			1.15281	1.26546			2.28133	3.59594	1.74542	2.2086	2.34099	2.18492					1.12368	0.901636
mmu-miR-1934-5p	1.19826	1.30814	1.28548	1.49631	2.70105	1.74917	2.81384	2.83493	3.68792	3.63617	5.77697	4.53638	5.30092	3.92109	3.72535	5.64214	2.84322	4.1213	4.6856	5.9541	2.14647	2.13524	1.2868	1.56903
mmu-miR-193a-3p	76.9236	98.9612	174.216	210.026	526.131	590.447	273.736	348.017	1062.06	965.38	504.824	488.108	2095.59	1779.67	952.334	914.384	769.983	749.628	1377.54	1400.81	768.385	832.083	4525.01	4035.03
mmu-miR-193a-5p	2.41598	3.10953	6.13544	5.445	18.8258	16.4095	8.88663	8.2316	30.7838	25.8471	15.1722	14.4533	74.7515	54.1757	31.1347	27.7731	24.8206	23.152	43.4266	45.1973	28.3863	26.742	196.023	189.199
mmu-miR-193b-3p	286.377	314.251	575.815	689.691	643.561	795.833	716.569	951.66	688.274	838.565	223.254	296.484	977.257	1133.89	483.362	589.492	624.652	681.042	1411.71	1316.17	253.432	294.396	587.345	655.615
mmu-miR-193b-5p	2.73049	2.24566	5.79121	5.67371	7.81688	6.66863	5.74609	6.43573	5.77877	6.78516			12.9464	9.77129	3.51099	4.88466	6.9233	6.40004	12.0333	11.1973	2.79356	2.04697	6.04459	6.62086
mmu-miR-194-1-3p							1.15324	1.01921					6.31192	8.53655	355.105	327.934
mmu-miR-194-2-3p	1.16708	1.08992	1.47815	0.944823	1.40441	1.61679	0.932799	0.651462	1.37214	0.522589	38.9235	25.5658	24.0373	20.1745	182.066	186.626	5.43022	5.22756
mmu-miR-194-5p	290.401	292.653	362.86	363.93	425.931	385.716	462.763	460.444	319.275	287.858	11925.4	10633	6392.47	6272.81	95266	93259.7	1428.24	1322.08	272.883	286.437	200.875	149.236	303.634	1074.62
mmu-miR-1941-3p																							1.92772	1.55024
mmu-miR-1941-5p							0.480674	0.611527					2.28039	2.76423									3.36445	2.04084
mmu-miR-1943-3p	0.867961	1.04017	1.13392	1.25704	2.03421	1.63402	4.20298	3.07552	2.55094	2.82345			2.01494	2.59524	2.13628	2.25794	1.85281	2.88918			2.09928	2.21893	1.9431	1.42538
mmu-miR-1943-5p	0.351955	0.702068	0.575283	0.648627			1.20426	1.75054	1.48181	1.405			2.08077	2.12633			1.89563	1.06296			1.15074	0.967737	1.12808	1.32152
mmu-miR-1947-5p	1.19386	0.835267	1.07028	1.37599	2.7765	2.92963			1.59401	1.50048							2.36591	1.87015
mmu-miR-1948-3p	0.891083	0.386684	0.519871	0.573982					0.67739	0.505447	1.88572	2.22401
mmu-miR-1949											2.34532	2.81432							2.66602	4.56559
mmu-miR-1953			0.671033	0.404583					1.11097	0.920376							1.40745	1.15147
mmu-miR-1954							2.51617	2.05312	2.98758	2.57994	4.06672	3.71672					3.56314	2.89639					3.31886	2.30161
mmu-miR-1955-3p	1.1968	1.12753	0.996661	1.00345	1.89276	1.9784	0.886463	2.04577	1.72205	2.31192			1.54401	1.46961	1.85382	2.73991	1.81	2.62492
mmu-miR-1955-5p	2.51506	1.80531	1.9197	1.88726	5.26941	3.95329	3.7312	3.24359	5.90885	4.79637	2.35647	2.13189	4.42817	3.54888	4.59043	3.10891	4.69263	5.27277	5.12183	3.92826	1.94874	2.68481	2.04745	2.46404
mmu-miR-195a-3p	3.22704	3.44372	2.3589	2.13061	5.52738	4.04312	4.49784	4.66632	21.8725	23.9744			6.17673	7.21711	4.10124	5.20453	10.1512	8.18423	9.13468	8.41071	3.85216	4.32637	6.0424	7.25067
mmu-miR-195a-5p	508.656	526.118	371.241	357.569	647.5	588.623	441.137	453.857	3204.22	3195.52	96.0524	93.4592	630.452	794.732	537.826	521.842	1031.38	1008.55	713.044	680.405	271.455	248.636	1484.38	1360.97
mmu-miR-1964-3p	2.82004	2.53518	2.65887	3.02636	6.22994	6.86218	5.47744	6.43475	6.15215	7.01281	7.10842	4.75823	7.31516	8.31151	6.2653	5.72092	7.58954	7.24396	7.42389	4.88954	5.24446	5.18362	4.18387	3.99991
mmu-miR-1964-5p	2.44277	2.1771	2.89267	2.86821	5.98475	3.88069	3.48641	3.83944	5.95475	6.4694	4.14751	5.20755	6.84939	6.47569	6.09888	3.79259	7.02298	7.60393			3.29982	2.50468	2.96682	3.44746
mmu-miR-1966-3p																							0.717267	0.533691
mmu-miR-1968-5p	2.96244	3.79122	2.41627	1.90259	1.68328	2.67279	1.80616	1.96909					1.27597	2.86434	7.05465	7.96393	4.05494	3.2118			0.649331	0.881754	1.79317	2.39222
mmu-miR-1969	3.31732	3.47858	4.49985	3.91256	1.68328	1.64791	1.35403	1.12848									1.56783	1.34228			1.05113	0.707496
mmu-miR-196a-1-3p																	7.99933	7.05972
mmu-miR-196a-2-3p																	117.871	96.3306	58.2125	52.3929	43.4928	32.7757	2.55821	0.955783
mmu-miR-196a-5p	0.423519	0.29775	3.63967	5.94126					39.7665	30.0237					286.146	144.393	5413.33	5781.83	2800.61	2666.51	2208.34	1849.65	103.012	60.2838
mmu-miR-196b-3p																	144.104	120.094	23.5055	29.3362	45.5929	34.9429	55.9578	43.3715
mmu-miR-196b-5p			1.74249	2.53689	3.10922	2.07983	10.3427	11.4867			18.7096	14.5717	3.01889	1.42597	622.422	334.632	5993.73	7112.66	1240.52	1699.2	2958.56	2262.75	3198.36	2809.18
mmu-miR-1981-3p	9.48334	8.38519	13.1855	12.0502	12.9947	15.2882	17.528	20.421	11.1439	11.0993	63.4297	66.4553	10.6157	14.9528	43.0623	44.0457	15.578	16.8464	13.8899	13.3869	10.6451	14.28	37.5005	43.3185
mmu-miR-1981-5p	32.1641	30.2929	43.6522	40.1086	55.1109	54.5789	64.3603	82.1658	49.8696	51.7284	260.877	269.029	82.8614	65.5484	201.659	223.4	71.6837	62.6747	54.1472	56.8955	52.5444	60.7344	169.595	204.454
mmu-miR-1982-3p	7.84137	10.0961	9.79724	12.7967	9.257	9.09146	9.21004	12.0487	5.19522	6.81704	7.12789	8.88665	5.64043	10.5752	9.61476	11.5697	6.72373	9.23402	5.50157	7.52298	7.14638	7.52808	8.43912	8.98987
mmu-miR-1982-5p	0.81732	0.331444	0.612878	0.784284																			0.92377	1.09721
mmu-miR-1983	1424.84	1226.13	1770.3	1458.57	632.745	608.849	837.136	894.04	329.154	301.139	808.929	705.424	544.111	634.685	750.643	708.392	743.693	727.95	703.819	628.729	544.564	501.841	770.266	799.241
mmu-miR-199a-3p/mmu-miR-199b-3p	487.672	433.402	909.033	845.475	18899.2	13564.5	6491.29	6514	16832.7	16388.8	1462.03	1475.26	21733.2	23861.2	14136.1	12221.4	13967	12272.7	29714.2	28598.8	29554.4	21577.7	3390.18	2937.77
mmu-miR-199a-5p	233.589	225.657	461.583	450.134	13071.9	8854.1	4852	4943.75	11127.7	10477	1102.56	1067.57	14224.1	15258.2	9834.51	8064.1	9295.96	8134.83	25950.5	23898.8	22800.8	15972.8	2952.03	2337.15
mmu-miR-199b-5p	273.607	265.134	511.361	473.194	5622.5	4645.74	2260.87	1975.28	6257.83	6434.37	402.577	344.344	6799.96	6738.89	5020.43	4265.3	4339.69	3913.64	8948.11	7999.38	8288.81	5414.9	484.732	397.152
mmu-miR-19a-3p	3104.84	2968.55	3080.49	2837.01	6261.67	6141.76	2781.76	2535.83	5499.98	5189.28	4864.11	4311.96	4957.97	3981.67	6101.53	5485.58	8649.57	8011.31	4234.35	3410.72	2434.91	2051.41	2376.6	2131.03
mmu-miR-19a-5p	17.4454	20.0257	19.0364	21.0614	28.7389	33.7347	12.3908	12.3839	32.7869	34.0786	24.6844	26.1185	22.1566	24.4212	30.179	25.2594	42.53	43.5049	21.7606	19.4347	14.5054	12.0448	10.0911	9.50037
mmu-miR-19b-1-5p	49.186	52.1258	42.6066	44.1806	83.2538	82.1084	32.2066	31.8393	56.9317	57.7303	36.2662	34.9582	52.2371	54.1316	50.5062	46.5536	116.557	102.766	56.7684	45.7646	28.0867	21.8441	24.3008	22.4493
mmu-miR-19b-2-5p			0.443506	0.944823					0.718715	0.526273					2.06574	2.38087	1.53567	0.953436
mmu-miR-19b-3p	16073.5	15191.2	14430.1	13208.6	24882.8	25561.2	12906	12229.2	21975.6	21077	15105.9	13427.3	18789	18352.6	21458.5	19747.2	35568.9	32566.6	18655.4	15810.5	10497	8882.35	11280.3	10049.9
mmu-miR-1a-1-5p			1.42392	1.70592	39.1617	34.9979	266.724	237.727	2.96615	3.14658			10.6159	11.1066	13.4009	9.04625			30.4879	13.4841	219.076	183.755
mmu-miR-1a-2-5p			0.210885	0.354819	22.8275	17.7485	383.977	360.696	1.98576	1.57145			1.61125	1.49784					23.7446	13.5506	181.707	150.164
mmu-miR-1a-3p	52.8226	36.675	209.493	166.322	8041.65	6959.93	82199.3	79650.1	607.706	515.5	26.4809	22.475	2715.08	1857.1	1728.24	1489.93	85.011	109.765	5570.86	2911.26	43501.4	39904.9	42.371	40.9659
mmu-miR-1b-3p	2.12346	1.56554	1.96004	2.24378	2.8708	2.51388	1.76871	1.52147	2.37395	1.83947	1.96651	1.72581	2.8181	2.15756	3.38488	1.74631	3.04302	2.47146					1.54768	1.37456
mmu-miR-1b-5p	1.31094	1.69757	2.10532	2.1964	1.49737	1.68588	1.44202	1.0665	1.85416	2.74639					2.34819	2.72519	2.08796	3.03605					1.17586	1.05854
mmu-miR-200a-3p	873.052	751.055	201.076	37.8289	1126.75	983.386	64.1464	57.386	7497.73	7330.1	1257.84	1576.52	12913.3	13447.4	14627.1	13737.3	9036.16	8612.78	4368.31	3726.43	6.71234	7.29464	385.375	682.551
mmu-miR-200a-5p	4.36846	3.84763			6.74857	7.07034			48.6964	48.8374	9.22253	9.74956	77.8518	94.4276	125.613	114.733	70.8777	63.0009	34.4008	32.2604			2.56261	4.99106
mmu-miR-200b-3p	650.464	544.945	189.638	37.9009	1074.18	951.645	48.235	54.5658	7666.55	7246.97	1163.19	1452.44	13602	13352.6	14941.4	14718.9	8981.65	8779.93	4062.3	3599.96	4.9587	7.88018	377.72	717.911
mmu-miR-200b-5p	8.26715	5.38614	1.86468	0.607723	13.8757	11.2677			95.274	92.2069	17.0384	24.1239	131.29	199.569	228.107	215.103	116.681	114.122	61.8416	56.1171			5.24878	10.8838
mmu-miR-200c-3p	181.25	150.144	67.6177	13.5547	593.38	472.788	9.25639	10.4704	5224.62	4753.37	67.084	76.6728	7748.39	7283.19	9572.43	9643.41	2079.74	2142.31	3695.05	3311.04	8.95841	8.34606	5993.24	7032.54
mmu-miR-200c-5p					0.885081	0.903944			8.37663	6.86109			20.5345	15.2497	20.4125	15.2295	3.82682	4.48722	7.63543	5.88407			9.78908	10.8705
mmu-miR-201-5p	0.611424	0.494422	0.691594	0.510583			3.01182	4.47718			3.22274	2.85944					1.95974	1.48852					1.78657	1.68173
mmu-miR-202-5p	11.173	10.9607	6.6412	6.77462					0.652915	0.933833							1.05474	0.975087					4.33819	4.14688
mmu-miR-203-3p.1	77.4333	84.3204	38.3284	42.6881	1442.7	245.934	19.5822	21.0092	188.609	195.914	39.4499	38.0676	9144.59	8051.39	1009.48	969.751	235.787	272.286	29615	27275	25.1895	17.6226	460.69	589.027
mmu-miR-203-3p.2	136.473	128.348	63.7458	62.5262	2040.2	337.381	29.1803	33.0161	267.363	261.989	70.0171	62.1727	14619.1	11627.3	1606.54	1453.44	358.245	379.825	43131.4	37358.4	33.4933	24.1375	925.009	1089.56
mmu-miR-203-5p	2.94005	3.48133	1.67357	1.75569	41.3541	6.37611			5.16616	4.84284			261.707	229.851	26.3651	23.4343	6.62383	6.51805	842.666	666.133			11.8497	12.9942
mmu-miR-204-3p	26.4329	23.688	49.2514	37.7635	171.207	190.459	1.01658	0.847954	1.70114	2.28004			1.27527	1.90129			8.06004	6.79547			2.84411	1.56374
mmu-miR-204-5p	2401.69	2250.08	4407.66	3857.73	15914.6	16826.5	83.3954	109.602	213.925	224.352	5.50957	15.239	83.8371	72.1759	44.3918	36.7847	725.656	682.622	149.736	166.558	279.846	177.808	15.1148	26.9706
mmu-miR-205-3p					13.3839	7.70267			0.981915	0.848126			67.0209	72.7847	1.96986	1.63313	2.74014	3.71865	147.13	161.658			0.871595	0.965727
mmu-miR-205-5p	42.133	35.9823	61.3625	49.8025	8255.65	4950.49	16.0177	37.3945	1653.4	1833.26	33.0239	39.8029	31083.8	36022.4	1650.52	1568.14	1663.74	1965.77	97956.1	82800.8	54.0966	39.0707	1360.41	1086.44
mmu-miR-206-3p	5.82979	3.42492	26.837	17.7239	11361.7	9838.03	3.39187	9.87727	6.60047	15.156	11.0636	21.8752	96.4708	6.14454	17.1805	17.0359	25.3327	14.1526	5540.25	2998.03	43983.7	43911.5	14.5629	25.8125
mmu-miR-206-5p					11.6555	9.21469															55.3918	47.29
mmu-miR-208a-3p	3.47692	1.95105	4.29605	3.04917	5.10976	2.65434	18513.4	13963.7	288.81	236.393									18.3983	15.9826	15.6584	9.84575	1.289	0.792252
mmu-miR-208a-5p							935.621	648.865	15.6994	14.6353
mmu-miR-208b-3p	5.75563	4.1654	7.25571	6.75276	37.5014	31.3189	24267.1	27789.9	96.1157	79.339			56.4158	45.8663	28.8772	28.1618			63.0456	59.4761	166.727	125.986
mmu-miR-208b-5p							374.139	402.684	1.32929	0.913008											3.89935	2.471
mmu-miR-20a-3p	212.953	203.685	193.135	185.951	347.372	384.888	143.046	144.09	173.928	167.438	139.887	130.017	124.801	159.289	172.417	169.034	401.372	376.011	150.666	129.781	104.167	102.812	81.7276	87.7485
mmu-miR-20a-5p	4492.13	5883.63	2867.18	3837.96	8029.34	11443.8	4084.7	5958.12	5584.51	8553.07	5171.92	5378.74	6408.47	7635.24	6310.62	8432.14	13512.5	17311.7	6338.4	6731.88	1759.57	2096.64	4872.73	5188.9
mmu-miR-20b-3p	4.55816	3.8018	8.00012	6.66045	5.71061	4.95164			10.0742	9.23902	3.52634	3.40088			15.9533	17.0346	11.8828	11.5671
mmu-miR-20b-5p	51.6185	74.5523	58.8371	87.9028	86.7104	147.335	4.33309	11.5626	101.614	199.276	68.0367	71.3076	11.2197	18.6548	404.304	538.608	328.939	340.787	12.6968	16.6008	30.2292	22.0413	4.85116	6.74351
mmu-miR-210-3p	468.082	606.62	620.343	735.502	3334.17	3536.1	2612.28	2602.69	1294.24	1221.77	1487.37	1736.55	5181.21	3852.89	2508.9	2490.75	1300.52	1734.62	4920.07	4603.3	1794.39	1361.56	3253.61	2756.94
mmu-miR-210-5p	8.02048	10.3268	11.8276	12.7357	55.7313	60.8965	37.5127	37.4947	19.5828	18.3752	31.1828	29.527	65.8672	71.4743	46.1851	36.799	23.7447	29.8528	105.611	89.5201	27.2176	22.6957	35.792	29.9507
mmu-miR-211-3p					64.3067	97.9052													2.51491	4.28194
mmu-miR-211-5p	3.80874	4.26135	5.04734	5.81993	4370.19	4030.09	7.01167	11.4637			3.63775	5.811	8.18673	5.24695			1.7033	0.908865	131.238	122.481	4.99992	7.34438	7.01614	8.03407
mmu-miR-212-3p	63.0099	63.1007	87.5929	84.6416	22.1304	34.9921	34.8945	54.444	32.5971	48.7544	9.79078	14.5868	34.2566	63.8661	48.788	72.8912	96.3685	120.695	24.8681	36.4592	20.3873	31.3773	32.3489	36.4876
mmu-miR-212-5p	15.9731	15.7447	26.0542	22.0131	8.07485	7.4919	9.27463	11.927	7.93542	12.0785	3.2868	3.81259	11.0768	12.1415	12.6014	15.2786	25.555	25.4792	6.90751	6.59496	4.84377	6.81701	7.23306	7.53465
mmu-miR-214-3p	89.5492	85.3117	165.463	153	5013.91	4014.55	2001.95	2112.17	5622.15	5565.85	533.976	547.515	6324.4	7374.26	4598.45	4301.5	5327.24	4946.84	11129.4	10347	9063.32	7294.67	1157.7	1040.57
mmu-miR-214-5p	9.41837	8.75347	16.3364	14.0363	478.088	306.03	145.872	154.284	388.486	389.52	34.7787	37.5469	769.461	573.086	365.7	325.37	381.834	327.434	849.315	768.016	835.587	602.303	97.7305	77.3376
mmu-miR-215-3p							5.29444	7.03673					24.9855	58.9224	1748.42	2042.95							2.90366	11.0727
mmu-miR-215-5p					7.55008	1.92091	191.029	215.057	1.68175	1.47597	14.1888	10.5635	909.079	1279.53	43177.6	44521.2	7.89671	2.6001	2.45054	14.1003			70.6194	302.848
mmu-miR-216a-3p	0.93586	0.844669	4.60736	5.56394	9.86661	13.9638
mmu-miR-216a-5p	59.9913	54.2735	347.427	294.824	629.923	699.707			1.02476	1.22509	11.2671	7.66466	2.61754	3.90868			1.6034	1.70162			1.05076	1.39407
mmu-miR-216b-3p	0.682255	0.614305	5.19811	5.83526	10.1172	16.3061
mmu-miR-216b-5p	33.3682	29.4655	241.756	198.807	500.987	580.682			0.807465	0.614386	7.2254	5.80349					1.28988	0.923934			0.69951	1.00141
mmu-miR-217-3p	1.09698	0.918713	10.0334	8.1479	20.7786	28.3813
mmu-miR-217-5p	15.3858	14.0961	123.631	103.25	297.956	346.462					4.20042	3.21852
mmu-miR-218-1-3p	2.66039	3.41669	4.66943	5.75754	3.9492	5.05307	4.07989	4.48135	14.358	15.7219			4.96682	6.04742	4.2023	4.01399	9.29986	9.86951			1.24886	0.772556	1.17805	1.03534
mmu-miR-218-2-3p	5.55386	4.54539	8.94686	10.0184	4.26307	3.42697	4.2554	4.04646	2.46321	3.22861			3.3591	6.3007	5.81398	4.53536	4.14035	3.11734			1.59712	1.72983
mmu-miR-218-5p	3141.1	3225.1	6706.68	6763.85	3323.7	3362.16	3334.27	3115.99	5100.55	5302.77	116.704	137.206	3607.07	3482.6	3186.57	2857.41	4812.54	4966.48	2010.47	2124.46	1135.75	854.024	552.705	503.056
mmu-miR-219a-1-3p	16.0138	17.6895	23.543	22.6358	13.0843	15.3697	1.06525	2.09306	2.48413	3.28116	2.43168	2.81432	2.88346	1.30703	2.43399	3.37944	3.47049	2.67671			1.59973	1.142	1.68442	1.89057
mmu-miR-219a-2-3p	17.8055	10.3492	244.677	237.504
mmu-miR-219a-5p	1230.43	1246.21	4463.42	5766.95	598.671	621.519	82.8951	93.3676	135.334	147.427	93.3813	77.4777	163.638	135.134	144.971	138.736	168.069	174.711	149.905	159.434	107.486	79.3572	100.716	87.8956
mmu-miR-219c-5p	0.51454	0.666801	1.10866	0.377314			0.67257	0.870005	0.589149	0.970522							1.10458	1.42357					0.821617	0.451925
mmu-miR-21a-3p	4.87307	6.38596	6.63318	6.31518	21.471	17.7958	46.3109	50.1709	64.2637	41.6169	59.9396	43.8412	92.196	83.8421	93.8131	66.6182	45.7146	38.5658	39.6922	34.7643	14.8837	12.6002	112.411	95.1816
mmu-miR-21a-5p	2086.43	1836.01	2386.93	2108.06	5963.29	5090.73	14605.6	14688.1	12064.5	9000.03	11645.5	9707.97	16569.6	18858	19433.7	16606.9	10213.8	9148.3	8529.23	8230.42	4559.01	3916.47	54534.8	48176.8
mmu-miR-22-3p	1785.74	1563.37	2165.75	1705.78	3906.56	2941.37	6947.82	6160.56	3519.81	2782.41	6422.72	6821.36	5767.1	3184.03	5075.47	4463.13	4753.19	4356.54	4767.26	4786.83	4574.7	4095.36	21996.5	19807.1
mmu-miR-22-5p	97.6887	83.4777	129.007	113.443	128.807	109.554	217.907	188.697	142.757	108.562	187.963	199.87	144.456	125.291	170.137	153.205	183.51	167.48	157.568	152.349	154.507	135.542	710.789	686.864
mmu-miR-221-3p	490.399	578.866	396.844	448.28	498.06	514.781	204.768	280.503	1312.08	1444.34	451.57	485.115	1022.9	992.518	690.86	760.938	1260.7	1417.98	1176.35	1194.02	198.384	168.937	684.911	673.781
mmu-miR-221-5p	6.81596	4.62923	3.14292	4.09729	3.70132	3.02281	1.45092	1.73584	11.2928	9.89506	2.28126	2.94968	6.51365	8.17675	5.56665	4.2157	11.1491	11.0361	5.70916	5.92085	1.14738	0.902676	3.70167	4.10378
mmu-miR-222-3p	377.744	361.986	322.622	308.215	248.792	280.21	110.472	163.38	732.605	863.178	245.828	284.946	623.118	647.926	387.822	475.422	715.282	833.92	712.403	753.236	107.314	100.33	403.143	398.715
mmu-miR-222-5p									1.35478	1.71099							1.77081	2.52325
mmu-miR-223-3p	69.4518	50.1639	123.535	92.6902	357.333	246.06	315.451	344.142	957.63	722.636	7327.82	8172.13	471.347	473.907	755.639	661.881	418.643	322.187	748.866	756.89	425.792	283.507	374.32	396.341
mmu-miR-223-5p			0.828466	0.463207	1.76882	2.26513	2.48715	2.15823	6.78567	4.2677	66.6329	62.1878	8.38917	3.37689	6.51753	5.62743	2.8969	2.31673	5.04562	7.80311	3.09575	2.17709	1.88873	2.08283
mmu-miR-224-3p					1.8941	1.67322			1.78887	1.7073													0.560741	0.738105
mmu-miR-224-5p	33.5608	44.476	32.6482	42.8104	348.393	419.7	195.519	215.699	346.812	391.302	34.0323	37.1126	200.526	305.42	190.75	193.335	242.438	241.306	161.719	226.224	275.062	274.701	197.073	205.987
mmu-miR-23a-3p	1288.83	1168.21	1682.38	1570.04	5216.7	5201.51	10888.3	10807.2	10794.4	9405.5	3118.75	3516.7	8247.41	12312.9	5619.51	5085.07	7062.36	6022.78	17530	15504.5	8848.4	7493.11	15294.6	15401
mmu-miR-23a-5p	1.99393	1.61138	2.82061	1.89612	17.0644	13.312	22.4578	18.6337	30.4139	23.6845	7.65712	7.1176	60.9872	48.0949	19.7471	15.0522	22.8468	22.9712	59.173	60.5058	22.7678	18.7496	21.5608	22.026
mmu-miR-23b-3p	1634.49	1467.64	2074.92	1931.4	5101.3	5214.63	6979.58	6782.18	11544.5	10171.4	3048.72	3243.98	7134.86	10447.8	8670.68	8629.32	13006.2	11044.5	10729.2	8962.95	7934.36	6439.53	4770.32	4671.1
mmu-miR-23b-5p	2.13485	1.58434	2.51045	2.02053	8.05128	7.02567	7.36176	6.85714	13.4974	11.3784	5.25331	3.98744	20.2736	19.5648	13.7716	12.332	23.4956	23.1947	17.9645	14.9155	7.98895	6.68129	4.19046	5.14684
mmu-miR-24-1-5p	9.38426	7.82298	13.0416	11.1575	34.721	24.225	42.0003	42.1493	46.3668	34.7568	15.2808	15.0455	80.2436	45.2079	45.6807	43.593	54.1878	48.6409	52.5834	38.3984	49.2009	33.3095	32.8508	16.7743
mmu-miR-24-2-5p	46.1292	42.8172	64.2089	58.1846	231.642	173.894	448.195	437.539	255.027	211.063	130.842	138.547	687.211	436.669	215.419	183.077	230.769	210.111	445.944	520.378	349.892	249.532	798.246	650.163
mmu-miR-24-3p	2666.3	2491.4	3297.3	3085.4	9779.23	8825.93	15025.8	14778.4	17145	14936.7	5139.06	5383.27	15321.4	19221.4	11563	10979	15431.4	14223.8	21306.7	18275.6	14845.8	11944.9	18681.2	17728.1
mmu-miR-25-3p	3654.33	3927.42	2385.56	3043.86	6231.17	6768.42	3171.01	2937.75	5665.19	5580.75	4276.6	4314.67	3507.7	4855.02	4529.38	4727.38	8520.84	7557.13	4523.57	4168.82	2789.25	2853.65	1721.03	1702.94
mmu-miR-25-5p	11.6109	10.7445	8.6451	8.37114	27.245	24.6295	8.64793	9.69305	11.1444	12.5104	17.2334	16.1415	21.6699	15.3686	13.4891	15.1509	30.6465	29.8932	13.5903	17.1348	6.79102	8.07995	2.79931	3.91152
mmu-miR-26a-1-3p	2.24826	1.66505	2.45347	2.74141	4.69418	3.6838	3.31183	2.19498	13.5484	12.4162	3.95531	1.94954	7.44964	7.0323	8.33867	7.93449	12.407	11.6013	7.72216	7.6429	2.59508	2.66389	6.77887	6.75456
mmu-miR-26a-2-3p	7.55658	8.14111	5.48771	5.34717	16.4044	20.8385	10.6638	9.93266	27.5023	24.4803	10.5011	11.4303	21.9441	19.5935	22.6501	23.8377	29.3385	31.1448	25.684	31.483	13.0398	9.10458	10.1697	12.8329
mmu-miR-26a-5p	14120.1	13078.4	12663.5	11901	27822.4	28530.7	19987.9	19792.6	36246	33083.8	12090.7	13113.1	18117.6	25197.6	25828.6	24832.7	33397.9	30771.7	27298	25787.5	18063	15457.2	29380.6	28634.4
mmu-miR-26b-3p	10.0441	9.58677	10.9803	11.1463	29.6934	24.5889	19.7704	16.153	38.7747	34.4205	21.7263	23.8833	34.9652	30.3993	30.7637	32.6082	43.0528	41.5558	22.4885	23.6335	15.1822	10.1897	13.1079	12.6473
mmu-miR-26b-5p	2535.37	2200	2894.68	2601.96	6953.57	7454.6	8472.82	8183.91	10872.7	9815.36	9386.76	9606.48	6173.28	9699.35	10051.4	9217.55	11179.4	10029.5	6711.84	6187.62	5567.71	4653.91	6103.3	6526.65
mmu-miR-27a-3p	1079.23	1422.46	1718	1699.89	5660.88	5470.32	11033.7	11033.5	12665.4	11088.6	3575.43	3638.34	13171	12847.9	6214.15	5215.3	7613.07	6961.18	19976.3	15489.3	9930.92	7074.9	16396.6	13999
mmu-miR-27a-5p	1.50471	1.31637	1.97276	1.99087	12.0982	9.12486	14.3233	10.2668	26.9989	21.3175	3.41493	4.07392	44.6163	24.1765	14.2763	10.1481	17.6159	16.1914	41.7104	37.5071	16.3165	12.799	17.3726	14.1323
mmu-miR-27b-3p	1396.33	1400.53	1893.7	1692.3	5889.98	4615.04	6100.9	6301.24	11768.7	10338.8	3470.83	3475.74	10337.7	10338.6	9030.87	8162.03	12737.5	11278.8	11210.7	8934.82	8297.43	5694.04	5499.93	4822.13
mmu-miR-27b-5p	4.36513	4.4349	5.06006	5.20027	18.4924	14.0686	17.5842	15.4805	30.1645	25.6158	6.80757	7.43907	49.4484	29.6236	21.7295	20.5664	39.7683	38.7719	29.2238	29.5806	18.2273	13.2312	13.2952	13.0263
mmu-miR-28a-3p	50.0719	51.0547	52.7535	47.5809	111.592	107.652	160.96	174.262	241.377	248.593	99.0441	99.996	280.145	298.57	261.822	255.428	249.262	233.274	189.114	166.72	95.6108	80.0333	151.238	167.846
mmu-miR-28a-5p	221.325	198.98	239.194	208.116	553.256	470.886	831.096	823.415	1123.93	1015.46	433.108	443.441	1491.78	1189.41	1186.18	1133.47	1113.93	1030.74	804.287	746.804	470.55	358.422	843.458	835.242
mmu-miR-28c	1.49884	0.924201	2.07086	1.19125	4.44898	3.88878	6.21648	6.83607	7.83135	7.26129	2.80491	2.49848	11.3389	8.92118	6.36118	6.70954	8.1382	7.22294			4.14613	3.37368	6.13136	5.76232
mmu-miR-290a-3p																							6.0336	5.65624
mmu-miR-290a-5p											2.47345	3.72798					3.98018	2.02234					3636.87	3660.41
mmu-miR-291a-3p	0.865029	0.362393	1.43978	1.09173	3.64606	1.94622	2.46983	2.24962	1.82969	1.10269	5.33685	11.3249					9.59616	4.46962					11620.5	9635.39
mmu-miR-291a-5p																	2.57636	1.10626					2883.03	2953.46
mmu-miR-291b-3p			0.517128	0.329937			0.992239	0.931991									2.00618	1.05511					2439.36	2162.41
mmu-miR-291b-5p																	1.43962	1.12855					1499.28	1502.63
mmu-miR-292a-3p			0.784992	0.438325							3.14753	5.72639					3.70948	2.3299					4742.57	4497.88
mmu-miR-292a-5p									0.566199	0.447933							3.74504	2.43284					3538.6	3420.56
mmu-miR-293-3p	0.444442	0.564552	1.05756	0.903919	1.26699	1.3923	2.04626	1.61604	1.24206	0.899551	6.35355	4.63413					5.67284	3.07809					5772.54	5205.06
mmu-miR-293-5p																							892.982	759.856
mmu-miR-294-3p	0.865762	0.57121	1.93713	2.21889	3.6932	2.33895	3.40029	2.15505	1.93986	1.53717	8.77683	15.6902			3.25142	5.70641	13.4053	6.72013					14747.4	14390.7
mmu-miR-294-5p																							647.386	664.522
mmu-miR-295-3p	1.07972	0.444668	1.44252	1.61356	3.32745	1.58233	2.29807	2.06782	1.61239	0.824895	7.944	12.6823					10.6688	5.78961					11410.1	10446.5
mmu-miR-295-5p																							594.549	519.86
mmu-miR-296-3p	733.665	743.911	661.452	671.42	1116.79	1087.47	627.703	581.448	759.109	867.821	325.794	342.295	1271.01	1018.21	891.77	924.59	1603.37	1642.17	1122.34	1076.27	1110.34	1046.23	152.896	163.062
mmu-miR-296-5p	1527.48	1524.98	1549.39	1473.66	2048.76	1869.09	1591.13	1304.05	1346.65	1351.6	964.207	1013.77	1731.45	2110.35	1519.78	1427.26	2150.65	2044.7	1886.04	1950.6	2461.14	2424.23	1192.88	1206.99
mmu-miR-297a-3p/mmu-miR-297b-3p/mmu-miR-297c-3p	7.06443	6.03571	13.6811	13.5779	11.7095	15.8075	7.42448	6.45362	9.42231	9.32345	3.54863	4.94246	6.98741	14.0556	9.86728	7.81654	15.1184	17.1423	6.69203	7.96332	8.34095	8.23686	129.809	147.756
mmu-miR-297a-5p	57.1342	67.0384	112.137	119.849	140.591	137.404	63.3175	63.9879	95.1123	95.4684	53.5386	42.965	117.995	117.463	93.2757	80.2736	146.216	155.169	79.8337	67.5194	71.5842	48.9313	1638.67	1559.58
mmu-miR-297b-5p	3.35184	3.74813	6.33478	7.14137	8.39416	9.3068	4.91346	4.01388	6.06441	6.39233			10.4683	5.46258	7.41802	5.54367	10.9354	9.78418	5.42536	4.37212	5.24296	4.77821	121.111	109.479
mmu-miR-297c-5p	53.9748	85.1725	104.854	155.286	108.108	157.807	48.0403	83.3438	70.6169	114.29	36.3943	49.7819	92.5846	140.28	71.3166	101.4	117.578	184.606	75.3663	78.5469	70.4357	68.1334	1184.69	1776.18
mmu-miR-298-3p	14.2811	11.9758	18.1367	18.8385	13.5302	13.6644	8.01187	7.93197	8.65821	10.7699	3.10851	4.63038	15.0385	15.0152	10.5632	10.1528	16.8115	15.179	12.12	14.5417	16.1992	14.9319	8.11182	7.82305
mmu-miR-298-5p	508.45	504.311	672.4	655.945	718.799	685.99	545.334	537.069	455.051	512.742	350.695	347.493	712.108	660.858	624.995	659.589	641.288	691.291	572.446	600.541	905.891	945.708	309.804	357.199
mmu-miR-299a-3p	39.0317	35.109	46.1086	39.1453	288.217	219.039	103.93	98.3703	267.885	257.213	388.174	371.737	290.68	232.093	197.461	158.948	67.0123	57.7296	425.851	378.722	940.579	821.834	197.891	170.518
mmu-miR-299a-5p	141.366	127.812	165.876	150.099	966.557	816.351	378.928	348.359	1007.91	952.732	1403.62	1316.01	831.861	797.441	698.761	614.335	260.12	205.598	1566.75	1426.37	3786.72	3785.92	761.257	656.293
mmu-miR-299b-5p	0.936593	1.05897	1.68825	1.07809	7.33255	7.91696	3.4691	4.27652	8.17771	7.28196	10.9049	11.0223	6.84775	6.65409	6.84548	5.61271	2.56549	2.08262	13.1502	8.76791	33.2061	30.6384	6.28129	5.07393
mmu-miR-29a-3p	629.773	861.744	580.323	699.002	231.408	217.281	911.733	967.283	864.74	899.689	1031.64	976.991	378.951	288.26	359.592	301.989	194.897	176.716	350.216	363.737	474.107	357.123	11452.2	9865.15
mmu-miR-29a-5p	12.5996	13.8748	11.1887	12.4991	4.90634	4.49105	19.0047	17.1617	19.8888	17.6998	18.888	17.6003	7.51971	5.42193	7.53895	4.63859	3.88028	3.72714	7.56974	8.0535	9.63662	6.57081	141.784	103.463
mmu-miR-29b-1-5p	2.13339	2.2202	1.78165	2.06074	0.87026	0.512444	2.54472	2.78446	4.97588	4.21996	3.28123	3.31064			0.76675	1.23469	1.06538	0.674749			2.04686	0.957276	14.3909	15.0726
mmu-miR-29b-2-5p	11.2292	10.2011	14.7864	12.2936	8.24664	6.75495	3.95398	4.14618	5.17074	4.09756			3.35745	3.77093	6.14164	6.63098	5.85429	5.58032			1.6986	1.34764	22.1018	19.9985
mmu-miR-29b-3p	401.829	1223.92	562.308	1403.65	372.253	665.887	653.827	1223.88	586.862	966.14	1104.43	975.933	347.813	569.061	805.968	789.98	310.175	524.091	383.202	497.399	449.954	430.135	12813.9	10123.4
mmu-miR-29c-3p	770.838	1037.53	1055	1354.8	819.375	1028.29	625.867	709.912	521.258	743.998	338.841	318.562	592.657	632.157	1044.74	975.318	783.445	879.09	330.659	337.391	330.676	314.264	2849.34	2558.55
mmu-miR-29c-5p	10.6394	10.4698	14.3136	11.949	13.8313	11.4717	9.66029	8.14119	9.98546	8.31992	4.51517	4.39915	9.12743	6.98524	14.1093	12.5043	9.71668	10.2399	4.23359	5.18981	5.50095	6.39527	48.137	43.745
mmu-miR-300-3p	1263.46	1486.95	2158.06	2415.27	1935.21	1591.47	484.904	561.676	1303.95	1421.33	2619.78	2466.79	1375.05	1551.33	1310.24	1117.58	343.271	290.561	2516.27	2415.45	6044.3	5385.5	1616.06	1471.86
mmu-miR-300-5p	85.5332	77.2062	146.493	122.09	92.5133	74.4784	28.1239	28.18	44.7622	44.4721	136.316	135.817	83.7186	52.2154	46.3143	42.1116	12.6351	9.2544	91.7541	82.7614	315.285	257.414	73.3627	66.7512
mmu-miR-301a-3p	4653.27	4287.68	4657.44	4377.14	5718.35	6776.23	5715.33	5701.15	4624.35	4555.7	2098.56	2106.89	3003.95	4068.64	3763.62	3527.41	5042.77	4904.33	3116.33	2894.17	3000.78	2594.64	1750.95	1645.08
mmu-miR-301a-5p	49.1317	42.6362	47.2148	44.4223	61.8771	59.7699	43.5434	43.5625	38.1692	43.0669	21.6483	20.8734	39.5408	35.1581	34.8854	32.9281	44.2757	49.8831	30.597	27.9452	25.4961	20.6279	12.2539	11.4418
mmu-miR-301b-3p	363.678	344.999	418.246	400.412	646.356	778.24	346.795	387.955	231.831	235.685	159.819	144.717	256.264	337.702	520.391	510.754	631.834	641.796	147.483	130.055	184.27	168.908	69.1168	69.1522
mmu-miR-301b-5p	9.07561	10.1917	11.733	11.3324	21.1363	19.8941	7.34351	9.27801	4.40816	5.85133	4.4873	3.21852	9.26333	8.69572	13.5419	12.4354	17.6342	15.4524	3.62784	4.42552	4.04764	4.60395
mmu-miR-302a-3p	4.23006	3.59298	9.62238	9.97313	1.77016	2.67279	9.30131	10.5535					1.07424	1.26639	1.47304	1.85453							45.3992	36.5131
mmu-miR-302a-5p																							1.7322	1.08838
mmu-miR-302b-3p	6.37778	5.09505	15.7723	15.5845	3.61846	3.63439	14.8073	19.5257	0.413682	0.495674			1.54401	1.71347	2.67614	1.85453							141.623	130.413
mmu-miR-302b-5p																							1.38895	0.543635
mmu-miR-302c-3p	1.49811	0.926944	3.37455	3.33073			4.29939	2.95253															48.0228	36.9728
mmu-miR-302d-3p	8.19919	6.68803	20.7366	19.3382	3.50059	4.89415	18.3784	19.3388			1.44285	2.13565	1.67732	1.60095	2.42392	1.99715							244.494	211.632
mmu-miR-302d-5p																							2.44507	1.36683
mmu-miR-3057-3p	2.6402	2.53558	3.14546	3.48787	3.28369	2.79023	2.72538	3.14486	1.93935	2.18952			1.27644	2.81429	2.07337	2.45467	2.58678	3.29967			1.74803	1.32672	1.43234	2.53586
mmu-miR-3057-5p	4.23559	3.6161	4.53295	4.66889	5.96724	5.59997	4.14775	4.47718	3.66192	3.37792			6.70715	4.50594	6.18958	4.8403	5.40893	5.59602			2.99651	3.2877	4.80777	3.85738
mmu-miR-3058-3p							1.81037	1.17895	1.43692	1.17126							3.08561	2.53705					1.26482	1.41655
mmu-miR-3058-5p	1.54802	1.3336	1.74406	2.44522	4.41397	4.04998	4.07192	2.61638	2.81313	2.12464	3.66004	2.54173			2.24987	2.2824	6.3495	6.621			2.24757	1.64385	2.6038	2.04416
mmu-miR-3059-3p	1.73666	1.06289	1.89836	1.83749
mmu-miR-3059-5p	136.408	131.888	211.357	220.046	48.1899	72.2826							2.21597	5.09678	2.34575	2.19388	4.2117	3.30943			3.1448	3.13436
mmu-miR-3060-3p	6.05994	5.83081	6.57973	6.94539	5.27075	5.74289	3.68065	3.8142	5.45231	5.39971	0.988828	1.54346			2.82241	3.14332	3.86601	4.12257	2.82371	5.15304	2.90026	2.96598	2.65158	2.95685
mmu-miR-3061-3p	2.48094	2.72951	4.31698	3.79462	1.20234	1.60871	2.05281	2.34835	1.1783	1.33034							1.6034	1.64262
mmu-miR-3061-5p	2.39506	1.88875	3.68275	2.68995			2.29338	2.51128	1.04822	0.899551					1.03668	1.6578	1.20787	1.4223					1.17366	0.954677
mmu-miR-3062-5p	4.46201	3.62001	4.22593	4.04753	5.24449	5.62072	4.78522	5.54785	2.74885	3.0205	3.4567	2.80869	3.08825	4.30871	4.74188	4.10251	3.57379	4.85315			4.95123	3.26448	4.68364	5.22752
mmu-miR-3064-3p	0.749421	0.482276	0.67456	0.524218																			1.37357	0.853023
mmu-miR-3064-5p	2.11686	2.19865	2.80279	2.14494	2.42085	2.80289	1.49725	2.24962	1.72256	1.35117	1.51806	2.18077	2.08007	1.86364	1.63946	2.28737	2.87901	1.82622					2.19958	2.04084
mmu-miR-3066-5p	0.628681	0.724786	0.535337	1.02186													1.04047	1.18755
mmu-miR-3067-5p	0.935127	0.755735	2.68923	3.12828																			0.862804	0.973458
mmu-miR-3068-3p	7.72097	6.74561	14.7214	12.3369	8.65954	8.82792	11.4023	15.6968	6.32456	7.1107	4.18927	5.04021	9.3957	7.64196	8.64646	10.5465	7.27964	7.64977	5.20462	5.70723	6.85129	7.49441	11.211	10.6097
mmu-miR-3068-5p	46.5491	44.302	82.1564	74.4374	66.6674	69.1352	106.31	116.457	65.2691	66.4283	60.1651	66.8558	52.3323	74.9342	92.7135	83.0683	64.8915	64.4843	68.6309	55.3205	62.9573	58.8255	168.735	146.435
mmu-miR-3069-3p	0.373611	0.460728	0.632263	0.662262													0.830243	0.865563
mmu-miR-3069-5p	0.982836	0.982185	1.51496	1.22908			0.871018	1.0518							0.862631	1.2888							1.01933	0.512696
mmu-miR-3070-2-3p																							1.21484	0.574573
mmu-miR-3070-3p	0.633813	0.515969	1.49676	1.28362					0.566199	0.698815	4.12521	4.04006									3.15116	3.61759	2.75812	2.1657
mmu-miR-3071-3p																					1.55105	1.26165	2.56261	3.68279
mmu-miR-3071-5p																					6.15738	6.33837	17.4445	15.5467
mmu-miR-3072-3p	64.551	70.9934	85.8319	92.133	100.011	98.8559	35.9621	45.4294	115.483	126.668	235.752	269.698	114.228	123.51	108.736	96.9592	29.5426	29.8753	117.717	149.478	229.492	240.691	68.5171	88.8976
mmu-miR-3072-5p	2.2512	2.84273	2.8539	2.80073	3.48577	3.72071			2.5744	4.70698	4.79372	3.26364	3.4214	2.26067	2.51217	2.23327	0.791053	1.30556			6.65095	6.52667	1.84754	1.75687
mmu-miR-3073a-3p															4.03559	4.35335							2.7845	1.77565
mmu-miR-3073a-5p															1.30906	1.52491
mmu-miR-3073b-3p															2.92837	4.38299
mmu-miR-3073b-5p															5.86681	7.50662
mmu-miR-3074-1-3p	6.0093	4.70328	6.55799	6.9437	10.3462	9.4302	2.8672	3.1081	10.5756	8.34187	6.70449	6.25657	3.55707	4.24325	5.96514	4.27457	8.57654	5.66161			2.00041	1.87271	2.90806	2.17454
mmu-miR-3074-5p	3.17753	2.89523	3.83431	3.97527	6.75669	5.84293	2.8466	1.98379	4.47243	3.50144			3.55777	2.42025	2.24987	3.34005	2.54057	2.88132			1.59824	1.7658	2.02327	1.81543
mmu-miR-3075-3p	0.489952	0.408232	0.594668	0.402196													1.07966	1.07866
mmu-miR-3075-5p	0.445908	0.792172	0.883878	1.10945			0.650573	0.753383									1.67816	1.34165
mmu-miR-3076-3p	1.40929	0.920286	0.824154	1.04196
mmu-miR-3076-5p	0.705377	0.666801	0.97806	0.863015	1.13296	1.14812			0.652915	0.373278
mmu-miR-3077-3p	1.5205	1.48052	2.09338	2.35046	2.31173	2.19604	0.954797	1.52147	0.741157	0.868952			1.94605	2.06686			1.53929	1.95803			1.19868	1.19659	3.09698	3.09165
mmu-miR-3078-3p	3.04246	2.73499	3.89756	2.86582	2.99474	2.37219
mmu-miR-3078-5p	2.85456	2.57436	3.88619	3.09215	2.12582	1.51079
mmu-miR-3080-3p	0.354155	0.475618
mmu-miR-3080-5p	1.05733	1.05623	0.650472	0.750542			0.549008	0.706098	0.587115	0.641301			1.007	1.25398									1.01274	0.954677
mmu-miR-3081-3p	13.1934	11.4203	28.9932	25.4383	9.7817	10.1426	3.54164	3.87937	16.8808	18.0841			10.9308	5.95672	5.87933	5.25843	16.6502	12.6602	17.1485	13.14	17.5174	11.1888	1.317	0.811033
mmu-miR-3082-3p	0.281858	0.420377	0.671033	0.546712	0.978036	0.67365																	0.810629	1.59113
mmu-miR-3082-5p	0.399665	0.427035
mmu-miR-3084-3p	1.73299	1.83234	2.89306	2.42103	1.52835	2.34107	1.55482	2.2822	1.8108	1.38786			1.94793	2.30773	4.50981	4.69767	2.99658	2.55148	2.81976	3.12719			2.50604	2.44194
mmu-miR-3084-5p	1.22578	0.614305	1.49754	1.46665			0.793791	1.19782															1.48451	0.833135
mmu-miR-3085-3p	53.5371	65.594	79.2279	90.2972	35.7705	45.6787	1.5127	2.15088	0.830924	0.654758			10.3355	12.5548	15.1286	13.7586	10.7571	10.6839					3.40783	4.25296
mmu-miR-3085-5p	3.2267	3.58632	4.75382	3.62045	1.97696	1.99792
mmu-miR-3086-5p	0.518205	0.47013
mmu-miR-3087-3p	1.71573	1.63801	1.76344	1.46188
mmu-miR-3088-3p	0.351222	0.362393	0.962986	1.06037	0.892492	1.06866			1.24257	1.05255													1.06271	0.678441
mmu-miR-3089-3p	0.37581	0.448583
mmu-miR-3090-3p			0.557074	0.818026	0.792127	1.60291			0.63149	1.71099			6.98435	5.56269	4.54767	4.3633	3.29583	3.51341			1.09795	1.49051	0.873793	1.10937
mmu-miR-3091-5p	2.5114	2.87642	2.02896	3.35221	1.80856	3.14482	3.32073	3.08287	3.4176	4.42182	4.76028	3.2204	2.55265	3.52706	3.68504	3.71879	7.22958	5.42623			4.50037	2.03421	1.43014	1.19224
mmu-miR-3092-3p									0.436124	1.42951
mmu-miR-3093-3p	6.7921	6.54345	7.49493	7.92157
mmu-miR-3093-5p	5.45511	7.70859	7.54917	8.62643
mmu-miR-3095-3p	1.19386	1.25681	0.691202	0.865402	4.89625	5.45265	1.60303	0.840604	3.44513	2.11486			6.10455	6.12871	6.34103	7.20168	2.06304	3.04264	5.65268	6.13094	5.34519	5.54618	3.79504	3.52921
mmu-miR-3096-5p																	0.855162	0.901648
mmu-miR-3097-3p	2.41158	1.87778	2.29839	1.89373	2.04903	2.41139	1.33204	2.2822	1.20125	1.45883							1.79573	1.51866			1.499	0.717957	2.8059	2.55575
mmu-miR-3097-5p	2.46955	1.74066	1.97433	2.02291	1.46638	2.25704	1.04747	1.62339	1.06965	1.14066			1.20755	1.1851			1.38253	1.30493					2.14081	2.99552
mmu-miR-3098-3p	0.725566	0.623706	0.614445	0.551487	0.947051	0.888999			0.78604	0.434476
mmu-miR-3098-5p	0.93586	1.55731	0.498526	0.895059	1.83079	2.34687	2.19182	2.78764	1.9618	2.11486	1.70468	1.76906			2.36835	2.19388	2.44067	2.39017					0.919375	0.688385
mmu-miR-3099-3p	689.334	723.874	709.084	840.453	195.655	224.783	54.071	57.8138	19.7302	24.0383	12.2614	17.0213	77.6289	73.6729	33.486	35.1862	39.5266	42.166	66.735	80.1542	160.489	190.337	106.138	135.829
mmu-miR-3099-5p	2.8986	2.81961	3.37729	3.70396	0.675598	1.04563
mmu-miR-30a-3p	320.359	299.606	321.353	305.111	273.598	297.377	574.44	527.589	697.343	642.538	506.323	579.507	182.558	254.889	283.235	277.544	1129.55	1032.79	174.016	150.086	146.51	139.25	221.874	221.004
mmu-miR-30a-5p	4101.79	3753.36	4240.59	3955.68	4187.1	3967.65	9694.94	9027.8	10912	9587.87	8690.8	9246.45	3573.84	3785.37	4673.14	4404.58	17783.3	15934.5	2845.39	2602.37	2294.85	2088.04	4211.39	4047.15
mmu-miR-30b-3p	9.4283	9.68002	8.89241	8.8456	19.1223	16.3901	32.6554	29.5319	38.0994	34.3531	8.84372	10.3869	25.2919	23.3674	16.4957	15.2048	27.215	25.5488	17.8042	16.3408	11.4401	9.69471	15.0966	15.0207
mmu-miR-30b-5p	4668.62	4228.9	5331.38	5039.31	7342.66	7115.16	14014.1	13204.9	13409.9	11762.1	3883.84	3996.16	5103.78	6005.53	6946.31	6689.4	8778.72	8194.29	5459.29	4980.63	4154.21	3759.73	9944.25	9946.88
mmu-miR-30c-1-3p	14.825	16.665	17.5548	16.8769	24.0333	20.5804	38.4315	33.9851	22.6657	23.7004	13.4034	16.1076	27.9767	20.7251	21.7166	20.3699	50.2616	51.7579	16.2682	17.1952	9.99609	7.94166	5.76614	6.3634
mmu-miR-30c-2-3p	33.3432	29.0957	34.9626	29.843	33.875	32.9749	54.686	52.1596	78.6726	72.1046	52.3158	55.5589	36.8991	29.1615	32.58	30.3903	138.549	126.544	21.7435	20.0851	13.5903	13.9165	17.9893	18.4272
mmu-miR-30c-5p	9338.77	8534.86	10122.3	10378.2	11258.2	12266.8	23889.5	23295.1	18230.1	17190.4	10477.1	11514.5	7992.26	10686.1	11217.7	10900.2	31271.3	30467.7	7643.53	7524.72	4101.15	4021.05	5732.61	6030.99
mmu-miR-30d-3p	25.768	22.9879	27.2643	22.4	32.6632	30.8752	55.8331	49.433	71.7727	60.1903	22.1385	16.7093	32.2214	30.8776	33.9926	29.4751	48.0171	40.925	25.3687	28.2525	21.0388	14.2987	31.4345	27.9276
mmu-miR-30d-5p	4240.68	3887.45	4966.22	4597.11	6101.02	6196	12419.4	11869.5	10719.9	9716.73	3391.63	3664.77	4958.57	5822.85	5783.94	5783.77	7157.64	7033.16	4431.34	4355.72	3454.42	3367.02	9503.31	9821.36
mmu-miR-30e-3p	413.057	383.239	444.555	428.163	465.013	491.811	876.529	824.15	533.19	513.19	311.68	318.374	317.611	418.131	406.701	409.744	1032.3	962.071	325.654	288.461	228.144	219.016	177.611	180.255
mmu-miR-30e-5p	5565.73	5297.75	6109.8	5871.95	7801.62	7294.22	15197	14175.2	8736.2	8174.07	5486.63	5565.27	6664.34	6933.52	7305.41	6752.22	16718.8	15466.9	5526.44	4927.21	3896.08	3263.67	3746.31	3696.48
mmu-miR-31-3p	19.1099	16.4895	36.7809	30.8638	224.759	222.304	29.0782	31.2408	95.6975	84.2428	132.216	121.516	362.868	385.441	1122.79	1141.97	81.9483	77.8889	199.231	198.791	13.0814	20.8802	70.4207	104.752
mmu-miR-31-5p	160.726	139.434	257.393	218.63	2108.81	1856.1	295.579	373.832	807.988	729.18	1651.93	1475.47	4862.5	4096.78	11542.5	11549.9	645.409	638.666	2003.62	2180.8	137.456	215.057	630.64	978.386
mmu-miR-3100-3p							0.740903	0.924641													2.30447	2.69986
mmu-miR-3100-5p							0.70112	1.18312													2.00079	1.75305
mmu-miR-3101-5p	0.796397	0.76671	0.845499	1.02594			1.17758	1.14318	0.479991	0.937517													0.912781	0.820977
mmu-miR-3102-3p	57.209	66.1088	73.558	72.8235	138.44	147.498	189.225	192.238	191.442	227.451	29.1689	45.1909	128.572	168.447	93.6614	103.404	172.328	194.16	125.087	124.747	203.549	209.599	160.841	160.934
mmu-miR-3102-3p.2-3p	17.9079	18.6705	18.4138	21.3052	36.3301	42.2782	51.8478	50.7447	51.8631	59.3492	8.28104	13.9212	33.9714	40.9591	22.6119	28.924	42.544	49.5984	28.1438	28.8732	51.53	58.1463	32.3714	34.5109
mmu-miR-3102-5p	0.588303	0.874448	0.748574	0.476841			0.886463	1.01921	1.6129	1.58859			2.08054	1.26639			1.43237	2.53642			0.850045	1.0874	0.964957	0.913794
mmu-miR-3102-5p.2-5p	21.4612	23.8521	24.1047	24.6134	45.7797	46.9004	65.7911	72.4456	61.2058	68.6976	7.6404	15.1037	50.5276	53.2567	27.003	31.9693	54.4658	66.8518	38.4243	31.3595	84.4886	91.3996	42.9799	50.915
mmu-miR-3103-3p	0.46903	0.451327	0.574891	0.687144					0.828382	0.685357					1.357	1.77575	0.815972	0.864929
mmu-miR-3104-3p	2.13632	2.79532	1.99685	3.67907	1.45022	1.66056
mmu-miR-3104-5p	0.565181	0.429779	0.326804	0.504111
mmu-miR-3105-3p	0.328834	0.537517							4.07763	3.97148	7.77968	5.61926			5.1706	4.71737	8.49454	6.26356
mmu-miR-3105-5p	1.41222	0.992757	2.14213	1.27715	0.823112	0.646047			7.41869	6.92229	9.81583	11.1558	4.89887	3.26137	7.49619	7.65899	18.5603	17.0649
mmu-miR-3106-3p	0.747955	0.700495	0.882702	0.892672
mmu-miR-3106-5p	105.857	148.283	188.272	284.961	6.2461	15.7291	1.08725	2.08154	1.19921	1.99984			6.91476	7.46698	3.26639	2.46938	0.947814	2.38296	3.35062	9.02789	2.89952	1.89592	1.78657	2.08615
mmu-miR-3108-5p	0.864296	0.666801	2.03758	1.23863					0.982423	1.25697							0.962086	0.667532
mmu-miR-3109-3p							0.52701	0.728149	0.742174	0.746556													0.962759	0.882855
mmu-miR-3109-5p			0.346189	0.454347	1.50746	0.660992	1.42658	0.997161	2.24947	2.10141			2.21409	2.45148			1.35399	2.01703	2.59376	3.19722			1.73879	1.40549
mmu-miR-3110-5p	6.61486	5.7928	6.62085	5.60962	13.0897	10.5217	3.90765	3.83724	14.0921	11.623	4.6433	5.2113	18.6513	9.57407	13.5874	7.43261	18.368	13.6484	15.514	11.8049	6.19523	3.85461	11.797	9.50369
mmu-miR-3113-5p	1.50031	2.07328	2.22202	2.26218	1.99313	3.34873	2.72912	2.38412	2.26988	1.86767					2.08589	1.92335	3.29243	2.86753			1.74915	1.59971	1.63884	1.38893
mmu-miR-32-3p	8.71006	8.08312	10.1816	9.89573	12.9758	14.9001	5.73112	6.43157	19.3604	18.3593	7.59306	8.35648	10.1448	9.39008	14.0137	13.8965	18.5923	18.9391	10.4631	9.97254	3.30169	3.38185	5.00988	5.4231
mmu-miR-32-5p	565.691	552.529	585.183	547.582	1142.91	1014.05	685.049	773.688	1386.46	1305.18	794.869	729.149	975.697	921.128	1333.1	1160.45	1544.09	1453.45	964.155	830.353	502.504	391.975	811.094	765.008
mmu-miR-320-3p	1513.64	1576.44	1581.89	1747.44	2636.18	2824.25	1902.79	2070.15	2013.4	2166.31	1633.9	1715.16	3793.55	2926.25	2183.28	2408.73	2333.66	2623.77	3538.72	3934.23	2044.01	1879.25	2400.87	2669.38
mmu-miR-322-3p	112.467	105.086	128.218	120.05	922.461	671.577	3349.3	2996	3054.79	2670.76	337.704	344.267	975.021	898.672	676.89	621.227	1442.45	1308.73	1745.5	1618.62	2450.01	2196.08	3493.67	3116.03
mmu-miR-322-5p	849.177	1596.69	825.561	1690.75	3470.57	7167.08	13102.6	36231.3	29527.7	41118.8	1730.68	4463.74	2243.48	12556.6	2341.5	8453.75	10630.3	18208.5	6281.47	19552.4	4961.21	13417.4	71090.7	66867
mmu-miR-323-3p	483.226	447.779	748.985	765.823	172.899	213.043	42.3307	55.2518	73.2786	78.8114	406.582	404.123	125.243	156.777	154.482	150.549	39.185	29.4027	139.4	147.53	343.975	378.08	99.287	115.568
mmu-miR-323-5p	24.4721	20.7324	37.8553	30.7912	12.4787	11.4026	2.56017	3.39917	3.25027	3.25056	18.4534	18.7396	11.6754	9.23051	9.59979	8.38703	2.17358	1.56918	6.02848	6.84535	21.8952	23.8551	6.16376	6.06396
mmu-miR-324-3p	332.099	409.9	371.561	427.557	422.288	457.446	263.293	306.405	330.171	397.938	162.123	159.811	355.526	382.045	402.072	437.392	418.066	434.334	305.797	314.089	242.763	233.299	125.024	145.354
mmu-miR-324-5p	981.972	1032.92	1094.68	1128.05	1231.5	1260.61	844.24	916.917	925.451	983.716	528.008	511.563	890.166	1000.68	1146.9	1176.5	1124.66	1078.6	772.185	708.957	794.47	735.905	565.832	574.591
mmu-miR-325-3p	478.061	442.882	546.096	557.297	445.02	489.604	1.95453	2.72247	2.17808	2.16869			32.3675	33.4865	39.7256	36.3521	39.4192	36.4492	4.99308	10.0557	11.2933	10.6334
mmu-miR-325-5p	70.3642	62.7724	85.6898	74.8907	59.5823	60.1983							5.57177	3.48342	6.28546	4.64357	4.81745	4.78034			1.89894	1.18613
mmu-miR-326-3p	640.098	666.774	865.628	885.668	321.3	316.261	244.083	293.084	685.587	660.06	235.371	235.488	373.832	349.265	350.403	349.806	282.298	289.044	182.479	207.53	133.042	116.151	812.059	740.578
mmu-miR-326-5p	1.33333	1.31754	1.28626	0.95607					2.4627	2.53829	1.44285	1.36298			0.76675	1.18059							1.16926	1.07622
mmu-miR-328-3p	823.595	973.622	1066.93	1238.76	1072.26	1125.87	1124.18	1218.88	888.129	941.147	700.835	845.213	963.712	938.766	790.983	848.129	887.161	947.172	644.566	715.851	800.055	890.518	1007.89	1045.97
mmu-miR-328-5p	2.21082	3.2874	2.99821	2.51748	5.13806	6.26921	4.94856	4.19665	4.78974	5.08763	10.4899	10.8869	5.09919	4.6591	4.94616	4.40269	7.2511	5.99082	4.75524	5.74049	3.9956	4.45291	2.35611	2.91154
mmu-miR-329-3p	415.968	365.63	669.183	603.441	1191.95	1294.53	471.271	543.334	836.539	936.738	2059.17	2190.56	1108.09	1438.47	1096.68	1100.7	290.247	291.376	1618.34	2208.36	4110.25	4602.61	1462.31	1597.59
mmu-miR-329-5p	98.484	95.1256	139.121	163.652	186.422	189.223	64.5976	66.9572	194.672	192.474	497.178	430.994	321.068	260.022	238.551	213.947	33.8751	31.4195	274.751	260.255	626.245	594.166	187.165	166.048
mmu-miR-33-3p	97.5813	111.8	102.297	132.408	76.9867	118.752	32.4074	34.3487	73.3723	79.2239	52.1766	49.5223	71.1651	102.092	85.4088	84.9427	77.8225	71.7575	90.0826	86.6126	54.5138	51.7972	35.788	41.4887
mmu-miR-33-5p	990.878	1610.41	1201.03	1920.7	1318.22	1608.35	601.4	852.995	1041.44	1364.95	1015.72	976.671	1605.97	1525.1	1299.02	1360.03	920.077	1152.49	1245.16	1297.2	1025.24	843.07	591.261	683.84
mmu-miR-330-3p.1	39.8472	38.6064	43.9402	38.7312	34.5674	42.6167	36.6291	51.9737	24.9942	24.9218	15.1805	12.7876	18.8711	31.9942	19.457	22.6919	40.1922	40.209	25.0271	19.2579	12.8952	9.84805	58.858	60.5932
mmu-miR-330-3p.2	68.9963	60.3371	65.6238	60.474	46.2493	57.8183	66.8245	83.8973	33.4892	34.4546	24.0493	25.2049	27.747	36.3808	26.9404	34.5963	55.856	59.75	31.9819	31.8734	22.3416	22.6794	88.2556	98.7317
mmu-miR-330-5p	207.086	200.286	212.395	224.841	204.505	204.443	293.473	349.799	127.147	129.18	104.178	106.73	175.726	151.811	139.701	131.151	205.203	206.052	137.581	130.095	87.7592	81.9833	358.379	351.549
mmu-miR-331-3p	2743.35	2543.63	3147.36	2902.58	1759.78	1666.17	814.311	782.348	977.06	1020.95	505.123	522.288	1279.45	1072.35	815.07	792.885	1173.55	1137.15	751.36	691.709	464.341	432.715	530.106	563.845
mmu-miR-331-5p	14.1377	15.2205	15.0752	17.1428	10.2883	11.8435	6.282	7.43926	7.28556	9.12768	7.33123	6.16633	8.45523	8.65507	6.10896	8.97245	13.0338	15.0858	8.45534	8.0001	4.49589	3.55023	6.81127	7.3888
mmu-miR-335-3p	523.428	3759.51	427.201	3890.46	498.848	6149.04	1470.2	15737.5	1645.72	12768.9	714.282	4785.62	364.156	6323.83	818.276	5989.92	3047.42	15535	724.005	7982.54	1064.17	13403.2	1391.96	7585.93
mmu-miR-335-5p	5117.35	4417.11	4753.36	4300.21	7122.84	6356.4	13910.5	14735.6	12910.9	10755.5	3929.13	3894.48	5856.13	5908.42	5928.72	5016.95	17603	15643.4	6662.05	6948.85	13745.7	10643.3	7046.19	6635.48
mmu-miR-337-3p	277.963	268.448	363.233	354.602	544.059	452.183	227.548	233.684	564.64	571.497	1321.52	1248.17	569.907	509.133	536.525	439.907	158.997	119.048	1070.21	911.715	1891.98	1667.82	920.871	773.047
mmu-miR-337-5p	131.419	118.651	160.771	148.69	326.137	276.42	121.767	125.146	276.576	280.467	616.004	614.25	273.6	308.156	260.177	223.345	86.4994	67.1927	510.827	513.599	1023.81	1041.45	345.247	224.337
mmu-miR-338-3p	529.896	487.913	702.265	612.243	393.212	325.313	55.1578	62.9605	125.613	104.01	104.776	98.1649	248.883	183.579	229	168.054	173.345	136.48	268.304	213.945	443.137	259.376	101.369	76.1145
mmu-miR-338-5p	34.318	28.5025	40.6119	36.4888	24.3283	22.8722	2.89107	4.63177	8.24452	6.77666	8.19193	6.30356	11.5498	11.5819	15.7845	11.4024	12.4034	8.91671	16.3378	14.6283	27.0611	18.3821	6.82885	5.62971
mmu-miR-339-3p	22.5108	25.2222	27.4419	26.8726	48.6601	48.0139	32.2131	36.5542	55.8355	65.065	49.7365	48.1914	49.0421	41.2397	37.6648	42.4468	50.4034	55.3505	28.58	28.3996	35.0788	32.7563	52.8848	58.348
mmu-miR-339-5p	637.605	864.241	704.269	950.554	1007.23	1016.15	764.055	844.61	1366.9	1504.13	1393.49	1396.87	1120.4	892.454	877.172	876.82	1272.77	1344.39	736.938	661.352	797.959	722.91	915.064	877.639
mmu-miR-340-3p	175.158	168.141	173.764	166.794	137.303	143.602	58.0362	68.5785	78.3641	80.0834	74.8916	85.8566	56.8724	68.4448	64.4946	62.6544	129.399	129.849	71.7713	66.5939	66.3329	55.7911	31.0154	40.861
mmu-miR-340-5p	1882.13	1740.34	1952.33	1913.76	1293.67	1426.56	505.651	602.175	647.111	708.92	694.879	737.915	525.944	693.563	636.652	571.75	1256.98	1229.82	621.638	651.082	611.046	494.514	201.201	256.116
mmu-miR-341-3p	102.83	380.156	186.053	682.914	486.983	517.788	116.562	206.306	223.893	448.011	828.666	886.316	450.124	435.14	301.853	358.09	78.1935	93.3641	537.282	613.176	1640.61	1565.05	282.049	416.848
mmu-miR-341-5p			0.784992	1.21614					0.544774	0.698815											2.29738	3.10757
mmu-miR-342-3p	4074.84	3853.72	4195.8	4321.67	2783.6	3811.7	1161.61	877.506	2183.97	2807.47	615.439	711.402	1762.88	2937.99	1753	1934.49	2996.01	3037.89	1804.95	2095.14	1277.92	1335.04	587.151	690.201
mmu-miR-342-5p	140.024	133.107	140.927	137.765	110.09	124.729	39.7046	43.281	74.413	76.803	18.2055	18.3561	121.433	103.538	51.1744	56.9679	87.179	90.5385	60.0651	61.2404	28.9799	30.7165	20.704	21.815
mmu-miR-344-3p	978.756	921.217	1172.03	1127.8	79.6683	93.5646	11.1257	15.9262	29.6402	32.4864	3.06117	3.399	71.3421	56.2896	58.3875	49.7021	27.9315	27.0163	8.9192	11.7611	8.94421	7.85797	1.77778	2.79221
mmu-miR-344-5p	1.10504	1.37553	1.17309	0.854155
mmu-miR-344b-3p	4.61873	3.06212	7.68625	6.96073
mmu-miR-344c-3p	92.8909	90.0788	83.6843	77.3983	2.94286	2.78443	2.50728	1.9071	2.18164	3.01314			6.24115	4.18378	7.36	5.41577	2.36954	3.30816
mmu-miR-344d-3p	39.1368	37.1674	33.0978	33.1144			0.954797	0.935175	1.02527	1.26674													2.18859	2.97452
mmu-miR-344e-3p	1.36304	1.12087	1.92088	1.93633									2.08219	2.19821
mmu-miR-344f-3p	24.6325	23.1019	37.0374	34.9758	1.72167	1.00186			1.19972	1.33034
mmu-miR-344f-5p	19.9892	32.624	27.6641	36.8269					2.48514	2.2238							1.43599	0.85113
mmu-miR-344g-3p	2.17816	2.18102	2.49224	2.12006	1.24208	1.03755			1.50425	1.56536
mmu-miR-344g-5p	0.424252	0.559064
mmu-miR-344h-3p	0.818053	0.758479	0.65204	0.917553
mmu-miR-344i	1.3803	1.80373	2.14919	2.64019					2.28876	3.14658
mmu-miR-345-3p	226.359	281.356	190.034	244.073	297.299	316.167	220.61	287.901	269.226	334.004	489.753	521.224	395.187	333.366	256.422	276.43	280.167	332.754	212.205	275.476	209.396	224.7	244.521	260.461
mmu-miR-345-5p	932.302	967.178	731.416	737.05	921.718	880.6	681.7	676.814	1108.51	1082.53	887.394	870.942	1223.67	1043.49	867.688	814.82	1007.53	993.205	956.054	888.337	675.585	602.171	1766.66	1482.09
mmu-miR-346-5p	119.616	114.039	174.658	171.808	101.839	114.345	5.85702	6.38012	3.21047	5.70698	1.77989	4.66236	27.9774	34.6618	9.52162	9.8823	57.5156	52.6071	8.03622	10.8235	12.1388	16.6967	2.76252	4.91149
mmu-miR-3470b	0.327368	0.319298
mmu-miR-3473b	224.047	185.914	807.491	797.371	200.087	174.564	90.0925	102.522	85.8713	103.555	340.212	310.509	245.143	219.812	314.952	434.744	326.88	373.009	574.223	692.244	289.819	218.315	160.788	196.897
mmu-miR-3473d					0.730157	0.684021			1.15484	1.4662	1.63504	2.94593			1.56892	1.74631	1.47881	0.982304
mmu-miR-3473e			0.747398	0.63738
mmu-miR-3473g	0.985768	0.48502	1.03935	0.919941													1.38253	1.29049					0.560741	0.502752
mmu-miR-3474	1.09991	0.959064	0.902871	0.992199	1.50612	2.17529	1.15746	1.11378					1.94558	1.75112	1.47304	1.2888	1.58913	1.8918					1.62785	1.47732
mmu-miR-3475-3p	42.4236	34.0563	89.2598	84.0158	13.966	15.8146	2.30228	2.88221	4.62444	4.50384			4.3621	3.04574	3.97757	3.27621	3.2068	2.44133			9.24641	8.02994	19.7029	18.9587
mmu-miR-34a-3p	1.75684	2.3107	4.69331	4.30452	9.56008	7.92382	11.6832	10.7867	27.3789	27.2251	4.07505	6.12871	30.0024	27.9666	11.5696	13.0453	9.80934	14.0131	46.4144	43.034	3.45335	4.09393	31.1659	32.9518
mmu-miR-34a-5p	124.446	135.315	417.244	308.461	647.172	430.302	854.734	753.643	2181.36	2009.55	286.224	276.223	2409.68	1938.76	833.536	768.375	712.272	804.934	3139.09	2568.11	237.4	196.378	1572.33	1614.94
mmu-miR-34b-3p	39.6398	37.9467	70.2747	68.1318	46.5713	61.3963	8.88008	10.6713	149.94	131.771			11.0824	11.4599	14.473	18.1317	34.6018	35.7626			7.73021	7.82558	19.4782	22.2636
mmu-miR-34b-5p	141.826	142.538	284.384	240.299	231.833	210.452	36.7966	39.408	557.921	423.607	4.58481	7.13073	64.8191	51.5929	62.6356	53.2186	122.183	123.782	27.8851	24.3908	36.8453	20.1842	66.1614	60.0563
mmu-miR-34c-3p	25.659	27.2257	48.3741	42.4471	39.3081	42.7101	5.08523	6.78143	97.2205	84.7939			10.6721	9.7653	10.8255	12.4012	20.3132	23.415			6.08815	4.52384	14.721	16.5698
mmu-miR-34c-5p	247.635	243.647	470.781	409.973	367.382	320.276	56.6602	64.0868	902.243	717.036	8.34235	7.39395	111.437	85.1376	100.686	90.5004	189.52	189.823	37.615	35.2248	62.3378	37.357	116.284	105.932
mmu-miR-350-3p	1190.46	1147.14	1146.65	1102.03	1054.34	1150.83	714.827	673.916	596.837	557.241	436.949	381.179	391.303	435.845	506.532	444.177	839.56	711.314	640.021	535.44	650.476	568.82	603.394	539.575
mmu-miR-350-5p	32.3553	31.3923	30.3921	29.8869	42.414	36.017	22.9661	21.4951	17.0945	17.3129	13.6346	17.6962	26.3066	19.5584	15.8651	16.1495	28.9824	23.0983	19.3074	17.556	21.0463	18.4171	16.859	16.1908
mmu-miR-351-3p	5.9348	6.83611	7.40271	6.79372	82.5617	67.851	314.653	289.818	207.429	188.473	33.4446	31.6156	85.6386	79.3533	55.8103	49.1368	121.629	127.34	127.397	162.707	257.931	250.275	656.709	661.557
mmu-miR-351-5p	330.978	408.554	424.021	502.223	3494.32	3425.1	17049.6	19810.9	12798.8	14802.9	1430.24	1867.17	5475.9	5153.05	2887.49	3445.52	6358.09	7099.06	6852.32	8166.86	9206.68	10391.5	15083.1	18052.3
mmu-miR-3535	5.53846	6.55362	7.91082	7.09776	10.8878	10.1703	2.98327	5.52701	7.62269	9.12174	13.345	13.8347	9.85934	10.947	8.83549	13.8915	19.1343	17.6543			5.14559	3.53518	5.65519	7.68272
mmu-miR-3544-3p	0.632347	0.607646			0.854096	1.05249					5.23659	4.89546									6.1031	8.28201	34.6946	37.3672
mmu-miR-3544-5p	0.329567	8.27197	0.268256	2.74789	1.95	11.4164					8.61251	57.7096	3.1569	12.251	2.38605	12.3813	3.75569	5.38951	1.04198	16.6078	8.45364	80.818	65.6386	485.178
mmu-miR-3547-3p	26.2241	27.8126	42.4378	37.7376	2.88089	2.45973	0.888804	0.793318	1.13341	1.36831			4.09619	5.22812	5.18068	6.27669	2.64749	3.09442			0.949281	1.27441	25.8627	24.8415
mmu-miR-3547-5p	0.84484	0.38394	1.13118	0.590004
mmu-miR-3552	8.20505	7.10368	22.0601	18.118
mmu-miR-3572-3p	1.05293	1.46055	0.977276	1.52289	1.15653	1.72965			1.02832	1.10397					1.43517	1.30849					1.09982	1.40224	0.667289	1.03755
mmu-miR-361-3p	37.4236	36.9053	47.2464	43.8742	46.1442	42.1285	29.9436	28.4171	39.0302	38.3624	24.3028	19.454	39.7966	39.7111	43.1664	41.8469	56.1381	49.5532	37.5912	36.1387	20.1282	17.1427	48.1765	46.7769
mmu-miR-361-5p	1231.29	1408.11	1288.82	1653.52	1101.86	1496.95	878.903	1102.53	1052.4	1156.29	463.931	519.748	722.865	1176.4	1086.93	1268.2	1346.5	1474.53	850.436	949.834	629.062	663.571	913.343	1084.94
mmu-miR-362-3p	317.837	286.084	239.178	215.288	486.385	487.588	690.146	598.358	424.684	427.44	187.999	178.457	336.329	361.91	606.613	552.195	383.403	339.603	646.178	512.206	1344.5	1169.04	365.833	335.95
mmu-miR-362-5p	156.973	158.923	131.376	112.921	472.642	381.681	562.485	478.116	295.516	282.442	164.251	136.896	408.249	339.889	455.676	447.101	287.249	260.911	479.785	376.166	1227.05	1093.93	239.211	198.025
mmu-miR-363-3p	41.0261	38.7071	56.1191	56.0406	48.5018	48.9503	2.58919	4.76726	64.5709	59.6246	20.8238	15.4478	4.4317	4.1149	160.557	171.652	87.4714	74.9269	6.3977	5.47698	9.6284	6.85427	1.44113	2.15797
mmu-miR-363-5p	2.55544	2.28641	3.03502	3.30653	1.96348	1.54999			3.35943	3.37296					7.58199	8.45607	4.59296	4.06888
mmu-miR-365-1-5p			0.826506	0.759402	2.36897	1.78837	1.87917	2.47134	1.63686	1.75504			2.75038	3.17067	1.87916	2.20383	2.14504	1.75278					0.869397	0.71711
mmu-miR-365-2-5p					2.2686	1.72965			4.01641	3.09884	1.50691	2.90831	5.43893	8.24905	3.70764	4.09753	3.98358	3.57899			2.40035	2.43962	6.71628	7.53022
mmu-miR-365-3p	236.445	204.186	527.709	471.893	1292.25	1231.52	992.016	1043.88	1722.13	1503.48	1064.81	1180.09	2413.16	2775.62	1573.12	1583.56	1467.45	1413.06	2233.55	2477.71	1482.06	1395.35	6116.97	6926.77
mmu-miR-367-3p	0.539127	1.44683	0.994701	4.68252			0.403448	4.65579															103.138	89.0791
mmu-miR-367-5p																							1.23023	0.513803
mmu-miR-369-3p	1890.55	2720.34	2157.26	3500.99	3150.05	3042.67	875.963	985.728	1587.19	1779.6	6401.62	6767.49	1910.84	2328.06	2170.94	2047.1	535.399	494.138	2572.1	2800.65	8545.2	7930.05	1751.11	1890.93
mmu-miR-369-5p	514.297	421.077	802.432	673.131	619.519	516.199	168.034	163.602	290.834	284.369	813.321	841.417	499.068	358.369	369.385	343.262	104.024	85.9645	375.972	324.273	1354.05	1246.34	302.744	322.844
mmu-miR-370-3p	548.89	523.559	845.967	786.221	606.471	508.626	127.902	138.97	240.349	284.995	404.273	375.604	629.223	466.782	338.568	308.057	114.518	93.242	473.659	372.251	1334.58	1290.67	69.1701	82.8933
mmu-miR-370-5p	21.4208	15.6816	30.9104	28.3859	14.0717	13.6597	2.65097	3.51162	4.83767	5.01425	10.8631	12.1127	6.91969	7.74849	8.24034	6.74395	2.10223	1.6059	8.48429	9.13822	31.1038	31.1242	5.43607	6.04629
mmu-miR-374b-5p	762.73	644.528	713.068	597.336	1702.21	1719.96	813.273	744.462	1807.51	1677.18	988.097	886.802	1186.07	1410.66	1613.73	1479.04	2108.68	1862.45	1030.45	946.47	850.053	777.427	694.51	639.414
mmu-miR-374c-3p	1.31094	0.810976	1.09437	1.11661	2.97991	2.61514	2.27326	2.25378	2.78865	2.35838			2.55171	3.04874	2.40621	3.47293	1.93482	2.1049			1.59787	1.17567	2.76252	1.98117
mmu-miR-374c-5p	4.52805	3.6968	4.55548	4.0114	12.7071	10.3653	4.51235	4.51712	12.2182	10.5155	6.27276	6.35619	7.3208	8.63966	8.80281	9.78902	13.2445	10.962	6.10206	5.18981	4.75089	4.52384	3.443	4.21648
mmu-miR-375-3p	32.5645	34.9519	67.074	73.7438	48.7534	24.9806	1.12469	2.85281	532.141	497.787	231.633	253.289	1989.42	1667.78	3939.84	4139.66	69.0647	78.2351	296.652	240.109	7.68415	4.9165	223.84	200.003
mmu-miR-375-5p									1.2839	0.889777			5.30257	5.12202	8.99428	11.2451
mmu-miR-376a-3p	3418.87	3296.79	5637.88	5564	4760.15	4229.43	1122.09	1528.13	2852.4	3055.31	9278.36	8545.56	4342.73	3686.69	3267.1	2860.87	789.954	729.057	5806.54	5982.94	16034.4	13106.6	3310.21	3093.9
mmu-miR-376a-5p	22.6638	17.7228	32.19	28.2734	32.6436	23.7623	7.96319	9.05848	16.9405	16.4439	53.9703	51.1447	25.7109	20.1561	17.9537	15.387	3.7165	3.72397	28.789	27.0811	94.6005	81.2743	17.4709	17.5068
mmu-miR-376b-3p	2597.54	5807.04	3454.7	10005	4985.54	8313.18	584.431	2855.3	2331.67	6683.07	11955.1	14125	1735.09	7831.53	2132.02	5516.83	564.42	1413.33	6525.22	11599.8	18731.6	25391.7	4167.39	6577.14
mmu-miR-376b-5p	37.2811	34.1993	62.8072	57.5679	119.418	71.4504	27.6975	24.806	55.4159	50.2803	151.958	142.596	117.605	112.149	66.0821	72.1374	18.4971	11.1587	148.01	156.468	289.524	225.301	86.2445	90.1484
mmu-miR-376c-3p	343.662	272.603	433.545	379.98	570.038	449.279	203.548	182.23	587.458	509.083	878.721	827.946	407.901	484.91	491.631	391.119	150.7	112.255	717.58	609.475	1695.21	1372.19	452.548	395.394
mmu-miR-376c-5p	1.26689	1.01979	1.7468	1.65207	3.11395	1.44979	0.771794	0.673513	2.1138	1.90804	3.61545	3.31627	3.09013	3.95532							8.65659	7.55259	2.17158	2.57342
mmu-miR-377-3p	356.339	406.151	388.33	440.224	1201	895.958	355.195	345.479	950.888	886.806	2565.36	2435.3	1089.07	844.495	776.124	647.864	226.802	178.967	1546	1281.82	4069.18	3326.9	977.66	802.738
mmu-miR-377-5p	6.21739	5.31327	8.37763	7.03946	13.2526	10.7369	5.484	2.93685	12.2145	9.84604	20.4087	19.2265	16.7137	9.70283	10.1598	7.67868	3.6345	1.98031	16.3641	12.1455	48.0238	43.0366	12.26	10.5744
mmu-miR-378a-3p/mmu-miR-378c	265.563	226.609	462.766	413.888	2787.52	2165.95	11778.6	12456.6	1208.86	1211.3	1088.32	1242.31	3253.88	2574.53	5655.62	5196.13	3494.37	3543.65	3323.22	2601.37	8853.31	8763.43	2360.54	2159.17
mmu-miR-378a-5p	21.7027	21.5426	38.3924	38.677	242.182	185.516	930.773	984.562	105.008	109.243	124.904	127.726	314.641	223.81	501.549	464.557	322.604	322.096	293.018	241.428	739.87	751.379	236.095	208.179
mmu-miR-378b	17.986	15.1574	31.4673	28.5267	199.635	140.426	775.354	856.244	75.3251	73.2003	76.7495	84.7606	202.332	167.623	365.662	356.342	225.314	234.283	208.35	168.855	629.824	628.871	178.586	160.727
mmu-miR-379-3p	141.655	238.626	214.582	362.378	700.781	862.19	201.433	348.474	618.173	905.788	1338.26	1509.75	498.179	940.508	494.497	704.181	164.751	211.914	1061.28	1421.1	2146.71	2719.31	515.722	599.564
mmu-miR-379-5p	465.846	407.803	632.215	600.205	1979	1505.41	609.855	575.594	1504.49	1375.57	2438.6	2442.03	2472.43	1596.59	1410.68	1178.65	483.387	361.422	2572.42	2462.87	4863.75	4342.3	1363.78	1278.72
mmu-miR-380-3p	398.204	479.754	631.258	835.742	1311.13	1457.63	290.132	488.245	509.845	713.301	1606.83	1672.3	701.01	1027.71	631.127	775.308	201.949	222.614	1507.76	1835.55	5476.99	6411.74	843.928	952.026
mmu-miR-380-5p	28.1168	22.1534	41.7053	33.6659	63.6605	54.4863	14.5171	16.4274	24.6907	24.5203	59.5022	61.7159	42.823	36.2623	31.6774	29.0619	9.36397	9.02029	61.5725	57.4295	267.875	252.376	38.6033	38.6898
mmu-miR-381-3p	878.335	784.064	1221.1	1098.36	3037.39	2174.49	451.398	363.142	585.809	566.666	786.288	710.018	971.73	759.589	702.323	556.166	211.311	151.299	2424.44	1657.56	11476.5	10451.9	416.589	356.68
mmu-miR-381-5p	62.376	55.1496	92.1789	83.6382	185.979	138.251	30.5067	22.7897	30.9648	28.9484	71.2845	64.6336	58.1881	43.1042	41.2668	37.803	11.7693	9.34886	150.549	93.5123	772.993	714.784	28.0486	22.9045
mmu-miR-382-3p	191.442	172.572	349.501	312.294	161.154	194.638	57.8129	62.6383	148.912	152.661	324.557	371.092	152.56	214.732	184.143	188.672	52.9421	40.44	243.153	277.525	523.115	551.957	226.47	228.181
mmu-miR-382-5p	1039.12	774.552	1795.46	1561.72	950.168	803.527	253.439	273.331	659.507	647.191	1400.44	1523.01	1186.79	909.428	749.021	679.78	218.277	189.95	895.406	957.111	2158.27	2024.47	1002.13	1081.11
mmu-miR-383-3p	5.33364	4.85137	11.0287	11.3246	2.20395	3.59626							2.01471	1.06317			0.698401	0.967235
mmu-miR-383-5p.1	75.1555	59.1006	173.274	158.972	34.7721	41.0446	1.02313	2.70679	2.88045	3.34364			14.1598	13.899	6.9212	7.98362	10.8817	10.6275	6.71702	6.98893	6.74159	5.45561
mmu-miR-383-5p.2	96.4702	77.3558	211.433	204.227	22.3136	29.725			2.57491	3.06584			8.52859	10.1529	8.939	10.8121	8.50881	7.7869	5.15077	5.37018	5.93761	5.28364
mmu-miR-384-3p	567.118	544.029	856.99	859.643	293.659	350.401	2.5012	2.95155	2.42138	1.93495			27.8767	34.1364	46.4627	41.0398	23.2248	23.4426	4.83671	7.26907	6.50116	7.19003
mmu-miR-384-5p	460.607	420.998	660.134	641.264	256.837	306.74	2.26718	2.30744	1.94037	2.52243			32.1074	35.1837	48.8188	49.4617	27.0625	21.8596	5.20725	7.07208	7.80132	7.91028
mmu-miR-409-3p	231.725	646.4	324.652	973.768	711.541	1183.4	174.126	393.439	477.428	908.517	1593.76	2013.6	713.451	1127.5	528.06	901.024	162.158	233.5	745.568	1365.32	2116.62	3397.72	585.705	852.832
mmu-miR-409-5p	179.925	162.801	258.335	219.499	316.862	273.19	108.318	100.98	183.847	181.921	599.578	607.988	244.467	211.14	214.741	187.486	61.2622	49.6513	277.59	291.525	920.454	925.671	227.581	248.717
mmu-miR-410-3p	1723.81	1903.67	2736.66	3180.22	2575.24	2651.86	499.691	844.52	1055.31	1556.13	4735.41	5333.53	1632.36	2113	1350.55	1621.95	346.44	410.97	2558.86	3142.77	9097.7	9512.71	1823.1	2211.77
mmu-miR-410-5p	3.51955	2.40629	3.06282	2.9541	10.5651	9.8711	0.837786	1.13902	3.1406	4.74254	4.83549	6.07984	11.2016	8.72395	7.50627	7.57047	1.35761	2.1049	12.4682	10.2763	53.3391	55.0015	1.53009	1.80549
mmu-miR-411-3p	299.794	506.175	441.357	764.422	1631.81	2002.63	414.625	731.717	1121.29	1735.76	2750.72	3209.95	941.344	1904.6	931.685	1417.21	332.472	424.729	2309.54	3155.03	5752.89	7385.73	1126.57	1382.09
mmu-miR-411-5p	404.981	345.191	541.035	523.778	1651.16	1227.39	495.092	468.324	1173.28	1100.71	1923.44	1955.37	1454.74	1316.46	996.42	812.465	334.816	260.436	2079.84	1850.98	4439.41	3876.74	999.758	908.846
mmu-miR-411-5p.2	183.91	152.486	251.145	217.557	662.75	510.681	204.197	193.476	481.45	430.395	744.891	755.04	636.137	545.13	406.088	351.063	128.392	106.388	780.561	719.601	1769.45	1572.22	388.454	369.778
mmu-miR-412-3p	27.7487	23.1677	36.8865	32.096	29.7607	24.2169	8.42514	8.6971	11.8452	13.678	68.7247	71.8847	17.5234	16.6222	17.7015	14.9195	3.35292	4.2217	22.5043	20.6429	89.87	82.877	17.8421	15.8671
mmu-miR-412-5p	46.9377	35.2571	66.8538	43.3776	80.7822	55.3778	27.6119	22.651	23.6884	19.041	103.052	92.6848	44.0927	33.407	34.7645	27.2269	8.97207	7.3902	47.7193	43.1111	264.793	233.687	54.0937	52.2564
mmu-miR-421-3p	95.2178	115.411	95.1566	113.442	241.41	289.594	122.733	137.163	209.646	223.04	128.09	111.998	144.082	231.368	245.547	235.666	260.907	250.014	132.829	127.208	132.193	137.063	114.367	107.191
mmu-miR-421-5p	1.04707	0.797659	0.765999	0.933575	3.18199	1.52925	1.76824	1.40166	2.26683	1.61919			1.87975	1.78235			1.86709	1.84787			1.24961	1.23844	1.38456	1.11821
mmu-miR-423-3p	373.818	409.969	392.899	421.519	871.476	851.731	518.848	541.7	919.311	937.315	571.09	604.584	942.862	814.809	874.53	904.93	1167	1155.92	790.669	768.518	438.359	416.795	391.047	398.818
mmu-miR-423-5p	309.39	310.62	301.827	288.693	769.779	746.596	433.045	443.05	725.569	710.589	578.178	625.913	995.117	797.97	766.257	829.361	948.201	984.153	733.64	803.034	417.897	410.427	441.851	468.189
mmu-miR-425-3p	16.9893	19.5912	20.4388	22.8022	34.7871	42.2775	37.4051	45.9679	30.3358	38.7174	31.4864	28.8972	40.2546	39.3573	49.9649	51.793	33.1083	42.3676	25.1912	24.3847	23.3722	24.5626	30.0362	32.796
mmu-miR-425-5p	322.989	381.712	330.174	384.282	781.417	853.32	574.711	721.69	804.276	905.792	931.342	946.219	1115.51	900.255	1219.37	1335.6	944.589	1014.57	731.111	778.186	473.686	507.032	986.22	1063.03
mmu-miR-429-3p	463.911	404.9	112.362	25.0817	664.796	588.255	38.1736	38.0085	3921.88	3896.51	927.701	1198.21	8192.85	8263.71	9528.92	9174.07	5286.86	5345.92	2413.84	2182.62	3.15639	4.54018	300.366	570.341
mmu-miR-429-5p	0.351222	0.497165							4.05468	25.454			17.4526	25.6713	22.0544	24.477	14.5341	30.605	4.81961	11.4145
mmu-miR-431-3p	41.9946	38.1226	61.3853	60.3636	38.6324	31.9702	9.46466	7.45935	17.6439	19.3385	62.0648	68.0702	19.741	27.7476	21.1264	18.5399	5.64407	5.07537	33.0712	39.5199	117.701	112.477	28.3441	26.3232
mmu-miR-431-5p	602.262	2536.63	834.38	4122.77	3063.72	2934.37	831.582	977.1	1288.09	1562.72	6280.8	6582.55	1721.28	2023.3	1545.95	1649.38	368.839	357.518	3331.08	3542	11584.1	11797.7	3396.16	3445.21
mmu-miR-433-3p	1071.51	912.67	1679.83	1557.11	1551.09	1488.13	373.738	441.35	731.297	808.544	2677.89	2967.04	821.468	1141.2	844.457	919.714	210.372	195.089	1501.39	1608.36	5229.4	5759.43	1561.32	1702.81
mmu-miR-433-5p	53.3875	44.5602	96.2671	78.1291	68.6275	59.2114	19.2705	18.2936	32.9531	31.4146	132.898	128.023	36.5944	40.6681	36.2324	29.8685	10.7825	8.55737	81.2071	69.048	252.642	254.218	53.7005	49.136
mmu-miR-434-3p	2242.61	1846.59	3608.48	3174.25	2782.95	2371.92	754.549	672.265	1515.71	1452.96	3981.87	3924.76	2129.89	1870.82	1686.74	1425.41	466.899	354.527	3213.82	3172.99	9415.88	9258.47	2186.81	2180.81
mmu-miR-434-5p	582.514	477.74	915.8	810.842	926.72	702.234	231.601	208.088	672.814	601.62	1131.72	1087.3	693.944	599.742	526.529	465.427	162.268	123.305	954.761	899.772	2510.52	2284.1	532.406	532.514
mmu-miR-448-3p	80.79	88.5865	194.821	239.161
mmu-miR-448-5p	9.58169	7.91623	20.0809	19.4476
mmu-miR-449a-3p	1.17367	1.44566	0.959067	0.996284					22.0087	27.8821
mmu-miR-449a-5p	654.23	667.895	701.92	652.102	187.001	114.208	12.7138	11.7388	7361.2	6662.4	9.70717	5.79598	76.5081	32.861	21.407	12.4846	13.768	9.97563	32.1804	27.9512	10.7506	7.51405	6.53118	5.29272
mmu-miR-449b	0.6606	0.684435	0.807905	0.709638					7.71863	6.7081
mmu-miR-449c-3p	0.940258	0.684435	1.34285	0.897446					8.61942	10.1592
mmu-miR-449c-5p	51.4621	49.8144	53.0058	53.909	26.1672	18.4478	1.58571	1.95439	1080.06	1119.35			12.7536	6.7542	2.75187	1.68723	2.17358	1.36393	5.587	5.29662
mmu-miR-450a-1-3p	2.65892	1.97769	2.30584	2.62586	22.3432	15.2431	65.6966	55.9305	32.1594	29.2957	6.65157	7.75678	20.8693	15.9659	12.7853	11.2155	22.8864	22.9063	38.967	34.4368	56.1097	47.4375	109.25	105.382
mmu-miR-450a-2-3p	6.48346	6.83652	11.7649	10.5338	95.1934	63.8314	350.96	286.282	119.108	103.31	34.2105	29.1114	77.3021	75.7513	62.0557	42.4661	78.1399	75.6587	165.753	170.533	246.789	209.772	379.425	305.39
mmu-miR-450a-5p	263.866	269.233	291.051	296.235	2565	1937.49	7952.15	7161.7	4189.67	3914.02	987.223	977.419	2337.69	1993.21	1599.01	1439.4	2602.16	2610.93	4463.67	4167.54	6618.53	5896.1	13663.1	13746.3
mmu-miR-450b-3p	16.2446	17.5414	20.48	17.4601	159.444	121.678	637.298	555.528	282.738	258.809	63.0285	62.9491	150.206	147.317	105.866	101.014	182.434	179.862	310.62	280.429	446.221	401.741	801.8	801.081
mmu-miR-450b-5p	13.4227	88.9172	18.0294	88.4332	232.568	464.591	452.798	2124.92	436.794	1137.18	125.054	270.431	213.444	562.339	147.359	375.663	281.658	706.615	534.216	979.303	814.629	1337.68	2328.26	2935.6
mmu-miR-451a	3503.83	3783.91	4440.08	5064.39	12459.9	11309.4	57571.5	18049.1	46957.8	31104.4	206487	196434	5038.77	4985.27	6842.99	9301.09	18589.6	17263.2	11042.8	24671.3	8307.1	30589.7	79509.6	76674.2
mmu-miR-452-3p	2.44277	2.46388	1.93517	2.0478	17.0005	15.7416	4.03402	4.06116	5.73694	6.08634			5.70603	4.21501	4.59806	3.66469	4.56079	5.0013	2.30996	3.98166	6.69515	5.17316	2.09523	1.65633
mmu-miR-452-5p	5.47823	4.98848	4.34106	4.06594	28.5645	25.8465	6.05313	6.73316	11.4831	10.7371			10.6681	8.036	7.45833	5.62245	10.2903	8.9685	4.61202	7.129	9.14493	8.18098	2.79272	2.42316
mmu-miR-455-3p.1	76.7607	65.3491	111.883	96.4433	795.977	605.657	297.343	328.133	1527.36	1561.85	405.652	391.584	1227.96	1402.7	1089.54	993.53	865.848	782.168	1077.98	938.312	1370.23	1049.4	108.979	138.441
mmu-miR-455-3p.2	22.2917	20.4566	33.1495	30.3024	162.477	166.012	77.0465	98.2796	383.894	408.5	173.902	159.717	349.663	489.62	325.601	331.864	213.137	210.05	289.912	309.257	348.545	331.508	33.9757	54.9823
mmu-miR-455-5p	30.6157	26.5186	47.902	41.6597	301.939	223.845	123.186	142.819	551.859	544.378	202.832	184.941	572.457	541.906	416.854	372.363	304.394	255.184	404.133	369.386	650.151	432.81	52.0402	67.5092
mmu-miR-463-3p																							1.18245	3.29828
mmu-miR-463-5p																							2.62358	12.5103
mmu-miR-465a-3p/mmu-miR-465b-3p/mmu-miR-465c-3p																							6.72946	24.9255
mmu-miR-465a-5p																							1.03032	5.9148
mmu-miR-465b-5p																							4.67982	17.9002
mmu-miR-465c-5p																							5.16421	26.1122
mmu-miR-466a-3p/mmu-miR-466d-3p/mmu-miR-466e-3p	104.177	99.4752	220.069	201.929	229.665	287.927	101.302	91.8092	183.939	175.04	86.8076	83.4503	151.492	227.895	155.198	172.666	290.151	299.494	152.735	137.142	153.761	127.011	3428.4	3800.06
mmu-miR-466a-5p/mmu-miR-466p-5p	16.0098	16.3766	33.554	30.8706	42.6558	40.281	16.8976	14.8597	30.1884	32.1059	12.4926	13.7351	40.9485	36.2178	25.3287	25.7361	45.6009	48.5807	29.3828	21.6208	31.2885	18.4544	475.611	426.048
mmu-miR-466b-3p/mmu-miR-466c-3p/mmu-miR-466p-3p	99.8465	89.8194	212.42	184.843	194.845	243.319	76.7736	74.7895	164.891	153.776	75.4098	73.7477	137.444	187.738	128.083	139.378	267.648	267.177	143.327	109.361	131.268	99.5837	2525.94	2633.37
mmu-miR-466b-5p/mmu-miR-466o-5p	9.51746	9.50332	20.3415	21.0812	18.9256	19.7227	8.34183	7.5086	15.1139	13.8457	7.06383	6.42766	18.3945	15.5624	12.1397	12.5486	20.4061	23.1056	9.05583	10.1862	11.9868	7.99397	241.536	242.515
mmu-miR-466c-5p	32.106	32.7921	63.9981	62.2055	71.8015	70.1168	28.1693	27.9065	57.0819	49.3257	20.1859	20.911	62.0943	62.8855	45.5625	41.4774	76.6903	79.4212	48.0675	40.6711	49.3383	36.5033	1032.27	992.884
mmu-miR-466d-5p	0.42132	0.444668	1.63519	1.41042	1.35861	0.776139											1.19723	1.07145					22.5834	21.3587
mmu-miR-466e-5p	2.33156	1.88875	4.56702	5.47566	6.16931	4.36325	1.97372	1.13583	3.94756	3.04133			4.02824	4.30913	3.1302	3.01044	6.738	6.84004			2.99539	1.95869	57.9898	51.3183
mmu-miR-466f	9.2246	10.3425	17.3221	18.8286	32.3804	35.3685	12.6571	12.5459	22.3816	27.6671	13.7126	13.4024	30.6069	26.847	22.9552	25.7017	39.3012	40.489	20.6226	16.3241	15.3241	10.2384	312.562	301.993
mmu-miR-466f-3p	2.03797	2.68916	3.12803	3.82905	4.02867	7.32856	1.0807	1.84193	1.52415	2.7097	1.62947	2.26913	2.35069	5.95372	2.3659	4.16657	3.93375	5.42559	2.73829	3.98166	1.9978	1.87271	37.6603	54.6177
mmu-miR-466g	15.9793	19.3667	33.2392	39.8403	49.7176	64.3345	20.5909	24.747	32.6482	40.3252	14.565	17.4142	32.7714	56.0504	31.652	38.1623	66.9881	68.3573	28.6575	29.0133	24.7106	28.9798	269.082	294.449
mmu-miR-466h-3p	10.0125	11.6746	18.6534	22.2496	34.5041	42.9433	15.0315	14.5517	21.6334	22.2009	11.579	13.9701	30.8159	39.7072	22.4128	25.476	47.4082	46.3523	25.8404	24.7575	25.5543	19.4535	192.435	201.999
mmu-miR-466h-5p	9.37473	9.88177	19.5788	18.938	30.8742	32.0186	14.6126	14.3657	24.9504	24.0455	10.9105	12.0149	32.9487	26.1779	24.5265	20.8863	37.0599	41.3527	21.8867	17.2451	18.0723	10.7798	409.07	392.3
mmu-miR-466i-3p	43.564	64.8265	76.9537	121.711	105.905	200.236	33.9538	70.6265	32.0182	92.0107	31.7148	59.1365	65.1233	169.136	57.6845	122.108	96.3549	171.818	63.4644	106.917	52.9243	96.3052	924.549	1734.25
mmu-miR-466i-5p	2.58003	3.89779	2.85703	3.59796	4.2678	4.44622	5.0988	7.24375	7.22179	4.85772	6.67944	8.44484	25.6196	23.248	11.6884	11.2349	3.45259	5.28847	22.223	38.021	2.3483	3.2854	49.5311	68.1246
mmu-miR-466j/mmu-miR-466m-5p/mmu-miR-669m-5p	6.57961	8.09801	13.4757	13.7504	18.2473	20.1095	8.43169	7.32264	13.2393	13.4944	7.01091	6.20206	16.9194	16.1285	13.0528	12.0859	21.0329	20.8792	11.9347	7.30936	9.78417	8.24834	252.348	241.974
mmu-miR-466k	7.58703	10.9486	16.2383	24.4505	28.5726	28.7954	10.807	11.4615	20.657	26.1323	12.3979	10.3324	28.7215	22.1819	19.7392	20.6896	34.9185	34.5362	18.0539	14.7386	18.7737	11.2235	483.883	430.485
mmu-miR-466l-3p	0.37581	0.515969	0.710195	0.476841													1.7246	1.6492					11.6646	11.8793
mmu-miR-466l-5p					1.22592	0.909741			0.675865	0.760013													6.22472	5.16123
mmu-miR-466m-3p	2.4435	4.1215	5.9645	6.51832	8.14021	12.536	3.30575	3.4832	4.99578	5.24799	2.752	2.80681	4.90263	8.77742	5.48084	7.65899	7.86025	10.0164	4.83671	5.79389	4.34423	4.19854	54.6034	65.4528
mmu-miR-466n-3p	3.14594	2.16496	4.75499	4.4562	6.28718	7.27899	2.62569	2.24962	6.3266	5.34716	3.0194	2.63196			5.70284	4.25011	7.38634	7.72004	4.44776	4.08847	3.14256	2.31767	35.9132	38.1672
mmu-miR-466n-5p	15.7874	16.377	33.1824	29.8717	27.3554	24.6267	18.0457	16.1342	15.7387	15.6999	6.64043	7.879	25.9105	22.1977	15.03	13.0157	21.5886	22.8203	13.7454	9.65563	15.4196	8.35524	442.557	379.558
mmu-miR-466o-3p																							7.10893	7.3457
mmu-miR-467a-3p	1.54655	1.94008	2.93418	3.31778	3.80437	4.20204	1.56324	1.68537	2.33059	2.68519					2.73661	3.41385	4.8281	5.26365			1.84689	2.19801	97.1901	98.292
mmu-miR-467a-5p	266.639	252.247	517.966	460.644	597.848	532.9	230.534	213.327	441.934	409.669	211.062	214.641	574.402	459.895	327.172	333.121	661.72	638.922	342.607	247.292	359.661	258.793	11658.6	11538.7
mmu-miR-467b-3p			0.363222	0.485701																			7.43517	7.52028
mmu-miR-467b-5p	13.1064	10.2481	26.1744	22.2193	27.6383	21.4903	12.4681	9.19079	18.3366	18.4707	11.3088	10.8399	28.3169	22.0976	15.3002	14.9786	27.5967	26.1253	15.8412	9.83248	15.1758	12.2134	988.933	1038.01
mmu-miR-467c-3p/mmu-miR-467d-3p/mmu-miR-467e-3p	70.9725	70.0003	135.078	141.132	127.593	183.758	76.4703	80.2237	118.857	112.294	66.5939	61.4884	102.176	139.705	97.8185	110.896	178.93	194.979	90.2154	76.0158	106.502	86.7799	3771.41	3905.44
mmu-miR-467c-5p	22.1787	18.9702	37.0878	31.3741	48.6304	44.0054	17.5598	16.8182	37.7102	36.2217	18.9687	18.8656	40.817	36.925	28.2241	29.967	62.4298	59.8228	29.9794	22.0813	28.407	19.5928	946.797	981.986
mmu-miR-467d-5p	40.3677	36.8677	75.761	68.217	99.9645	93.0964	40.2554	37.1794	62.5295	60.9415	27.7846	30.5703	110.349	84.919	59.5561	58.4878	113.159	106.997	63.6537	50.2305	66.7498	44.6215	1791.53	1719.16
mmu-miR-467e-5p	67.8176	60.2286	130.625	110.002	140.33	134.847	63.1771	51.589	87.2566	77.6951	39.2438	35.6369	124.041	123.835	81.7042	80.0041	155.091	148.395	81.2791	70.1816	83.9739	59.8856	2177.76	2301.41
mmu-miR-467f			0.363222	0.379701																			8.17604	9.20756
mmu-miR-467h																							0.910584	0.809926
mmu-miR-470-3p																							0.980341	1.8508
mmu-miR-470-5p																							4.87313	17.4505
mmu-miR-471-3p																							1.83655	9.12689
mmu-miR-471-5p																							6.04899	29.6171
mmu-miR-483-3p.1	21.8326	20.1984	56.7494	45.0654	727.984	466.572	1385.36	1175.76	146.624	153.621	1206.09	1154.73	641.817	675.321	564.906	635.413	416.88	362.539	912.176	801.024	2290.41	2334.47	542.129	442.649
mmu-miR-483-3p.2	14.5285	14.6963	31.3128	29.3358	501.098	381.98	849.654	799.356	68.57	83.0384	855.628	850.821	318.797	350.807	414.733	494.69	221.367	211.903	564.137	464.635	1922.87	2075.14	397.16	378.396
mmu-miR-483-5p	27.469	21.1904	50.5376	43.9484	475.82	433.473	867.477	915.025	130.462	133.531	1041.23	968.692	634.155	520.593	537.733	589.086	295.727	328.118	492.913	470.624	1691.73	1736.31	435.894	511.288
mmu-miR-484	2762.94	2843.98	2621.73	2796.43	3748.68	3876.95	2981.33	2870.38	4070.65	4216.54	2346.42	2332.56	2975.62	3589.28	3217.28	3352.52	3772.95	3924.94	4140.68	4212.56	2400.34	2381.25	2348.85	2378.09
mmu-miR-485-3p	109.903	294.133	198.909	602.639	233.046	447.529	50.9641	251.949	95.6195	267.794	430.117	648.582	134.308	652.453	101.411	219.371	29.6561	74.1649	327.391	1105.25	672.427	1240.45	292.898	505.05
mmu-miR-485-5p	27.7053	23.621	42.9176	34.748	47.9224	36.6022	10.0511	8.40285	26.2838	24.4054	50.1236	48.4019	52.6001	38.7266	27.8232	29.0818	8.31286	6.8912	42.0876	41.3593	103.509	103.635	30.5772	35.4147
mmu-miR-486a-3p/mmu-miR-486b-3p	48.1463	40.7185	51.5354	39.3382	31.3941	25.1027	151.976	92.6558	27.7758	19.0448	208.798	220.245	5.97547	8.51473	6.22988	6.6998	13.5791	14.8937	16.5888	34.4333	61.3915	68.0749	37.9151	41.6742
mmu-miR-486a-5p/mmu-miR-486b-5p	259.958	272.564	312.717	351.121	821.995	751.23	2870.31	2071.92	986.969	716.36	5645.77	6206.76	184.395	148.62	161.626	235.709	449.734	473.399	638.325	1032.68	2168.62	3395.08	1864.47	1462.02
mmu-miR-487b-3p	1483.92	1247.33	2550.38	2167.85	1460.71	1240.01	273.399	237.091	292.91	301.783	897.221	871.969	535.036	526.407	455.897	389.463	116.232	91.1086	1024.96	887.887	4930.49	5045.67	402.21	394.226
mmu-miR-487b-5p	0.79933	0.687178			0.854096	0.922399															3.10509	3.50151
mmu-miR-488-3p	312.949	305.219	315.894	299.722	139.955	116.352	3.54164	3.99698	1.65676	2.12223			23.817	13.2359	14.102	10.6448	10.3367	12.078			4.84527	3.13666
mmu-miR-488-5p	5.27493	4.58457	4.94806	4.6239	2.61417	3.04706
mmu-miR-489-3p	20.9118	17.3937	30.3073	23.791	38.6997	35.7585	5.13812	6.36223	4.72801	4.97869					3.82123	2.50877	20.2101	21.7684			26.6161	20.3837
mmu-miR-490-3p	14.2038	11.796	35.6184	27.9227	3.61105	2.91681	165.698	175.003	21.1303	20.139	7.75738	7.38831	159.076	176.302	139.726	149.245			5.2283	4.95957	5.59384	5.70282	5.57282	7.33467
mmu-miR-490-5p	29.598	29.7487	71.4357	63.1036	5.98947	6.10891	240.67	264.469	41.4567	44.9216	10.4815	17.8767	434.33	406.902	292.792	333.513			8.6525	9.91562	12.0741	11.4465	10.3196	15.5699
mmu-miR-491-3p	0.656202	1.11147	0.860181	0.987424					1.00385	0.6719			1.00724	1.11322									0.867199	0.544741
mmu-miR-491-5p	17.9269	18.8527	19.4721	16.533	15.92	14.2551	7.54009	8.53834	19.3833	18.2332	8.62923	7.30934	11.8113	8.47067	10.1497	8.16563	14.5912	12.6439	10.6102	6.75517	7.94139	9.35078	16.0731	12.3279
mmu-miR-493-3p	1.92456	2.49366	2.3213	2.38898	32.2947	23.9728	4.95511	5.89893	8.11496	7.785	19.6567	19.6796	10.4695	7.09177	7.02961	6.56692	1.10458	1.78165	27.2806	15.5931	135.685	136.139	6.23132	7.12361
mmu-miR-493-5p	16.8212	18.2877	21.2224	19.7472	128.766	113.081	36.0319	30.6503	44.3536	39.8311	122.539	120.882	33.4575	38.4738	37.0471	30.6706	8.29519	7.4492	132.911	87.531	656.575	619.224	29.9653	28.6469
mmu-miR-494-3p	119.603	107.88	94.519	82.517	287.578	231.458	138.849	129.22	495.429	464.643	978.312	942.665	403.934	372.584	385.243	295.529	120.437	97.3444	568.282	517.313	880.618	804.174	400.018	327.45
mmu-miR-494-5p									0.719732	0.913008											2.14983	1.90409
mmu-miR-495-3p	1646.57	3260.73	2360.99	5908.99	3275.47	5089.71	596.241	1618.51	1161.06	3048.19	7781.03	10630.8	1386.57	4784.96	1693.41	3617.07	405.739	826.544	3311.38	7157.14	12789.7	17055.3	3293.54	4555.04
mmu-miR-495-5p	10.3494	8.49918	14.2701	12.5864	15.4209	13.3466	3.8014	4.09473	8.33327	7.85485	21.8656	19.8751	10.6724	11.9793	11.2872	9.12482	2.26624	2.26622	14.8623	17.9228	53.1783	47.5188	8.75054	8.64954
mmu-miR-496a-3p.1	61.1253	52.2257	91.2466	82.4786	106.647	86.6308	47.7141	50.1596	61.0588	50.8843	233.655	226.248	90.7164	89.2884	80.4953	62.0095	22.6121	18.2242	136.447	139.284	318.596	253.565	119.303	125.081
mmu-miR-496a-3p.2	170.936	145.708	280.82	253.092	190.836	165.029	64.0271	62.2003	157.172	135.089	249.423	237.721	164.12	176.145	132.02	109.651	48.7517	36.625	242.324	243.053	464.637	389.633	140.006	142.21
mmu-miR-496a-5p	1.07386	0.758479	1.72742	1.52289	1.73043	2.2697			1.56903	1.33771	1.50691	2.17514	1.67849	3.11762	1.83367	2.13003					4.45057	5.45203	1.5235	1.5182
mmu-miR-497a-3p	13.5666	23.5391	10.2556	14.6021	14.9932	17.1234	15.3741	18.7199	115.71	151.796	2.08349	3.76184	18.0785	26.731	15.7265	16.0999	29.1745	35.6155	28.4355	27.9557	15.1967	18.7794	13.8736	14.3356
mmu-miR-497a-5p	355.58	393.776	261.203	257.665	492.316	392.528	319.476	303.159	2264.86	2261.84	78.2898	65.9553	598.105	555.974	418.08	366.557	786.544	704.815	567.674	477.1	232.74	193.722	1102.8	814.413
mmu-miR-499-3p					10.5098	7.60476	141.975	146.165	0.653424	0.59356					6.32332	5.10606					27.0108	15.7695	1.17146	0.729268
mmu-miR-499-5p	6.12265	5.15069	14.1757	14.4034	737.881	623.279	9671.72	10201	26.9724	25.4269	109.3	126.631	11.8275	8.73078	395.046	369.954	8.53033	7.97771	467.52	222.074	1688.47	1321.71	39.9801	53.4243
mmu-miR-500-3p	759.849	773.088	605.281	576.889	1235.68	1200.09	1617.67	1452.45	772.297	820.042	388.19	375.133	856.92	820.705	1335.71	1227.74	712.401	657.518	1338.9	1066.06	3317.27	3044.96	1096.73	1034.28
mmu-miR-500-5p	13.3295	14.0068	10.0994	10.3869	32.4631	29.4853	44.5876	40.0278	18.1882	20.4461	10.3283	10.4752	25.5653	19.7364	27.6695	23.9753	16.6826	15.3953	34.3878	25.9465	83.0562	85.5014	26.5811	25.5509
mmu-miR-501-3p	149.447	130.833	120.445	100.363	324.983	301.976	422.381	394.447	140.459	136.87	102.136	104.297	232.635	215.976	253.977	268.458	182.368	185.9	251.553	240.741	724.332	733.345	226.754	237.39
mmu-miR-501-5p	132.836	125.599	110.555	97.7563	315.956	308.143	497.766	484.488	167.149	169.843	120.748	119.615	281.783	234.178	348.28	337.222	165.921	166.265	279.157	273.218	866.093	868.577	205.932	188.719
mmu-miR-503-3p	8.91889	9.46688	9.9768	10.1493	82.7618	61.5593	255.552	256.012	260.835	255.222	30.5394	28.9931	108.515	89.8176	61.2557	54.144	118.871	119.502	146.791	156.821	203.012	192.323	469.969	476.568
mmu-miR-503-5p	180.181	532.075	267.645	729.841	2762.43	4081.18	7639.34	19255.9	11762.6	20640.4	926.539	2213.77	2548.04	5905.95	1669.62	4439.99	4445.23	10559.6	6122	10024.1	7517.95	9478.71	14784.2	20703.5
mmu-miR-504-3p	2.22954	2.67152	3.48851	4.24658	3.35039	5.02775	13.1252	14.7239					2.41464	2.47031	2.18422	2.81371					3.95028	4.00566
mmu-miR-504-5p	15.6695	12.9529	14.029	13.4184	14.9925	15.2467	22.4752	22.4246	2.22398	1.25937			7.38264	6.68532	6.24515	5.90791	2.16634	1.59868			4.95048	4.6981
mmu-miR-505-3p.1	25.0277	26.1577	32.3296	35.259	20.7604	25.0783	23.7669	24.5064	15.0271	14.0575	8.90778	7.16084	8.1216	11.7663	16.4071	16.3362	14.8975	14.4274	9.34227	11.8583	10.7937	8.43076	9.52601	8.6164
mmu-miR-505-3p.2	36.1013	34.7137	46.4372	45.5403	24.8968	27.4287	20.6493	22.2105	19.1603	16.1515	8.84372	7.39019	11.2804	12.1539	16.2358	15.023	20.9693	16.1704	12.773	13.1864	11.0922	10.6183	8.95924	7.87057
mmu-miR-505-5p	22.3907	18.4194	28.1699	23.6297	20.2545	23.6097	16.9308	19.5645	10.8292	9.64643	5.73796	10.5786	11.543	8.033	13.0757	13.3998	15.7459	13.4171	6.90488	6.39797	7.659	7.33419	8.4007	6.97333
mmu-miR-5099					1.21109	1.22178	1.11346	1.66651	2.31476	2.37439	1.77989	3.45726	1.54377	1.76353	2.59278	3.39913	4.71393	4.27072			1.49788	1.12107	3.52097	2.4552
mmu-miR-5100	69.3635	69.6766	77.355	67.649	205.604	165.991	473.147	273.919	381.694	286.644	169.805	184.426	399.2	304.741	379.186	358.346	387.389	296.638	359.1	368.473	178.526	188.295	181.781	201.699
mmu-miR-5101	0.727766	0.786684	0.557858	1.01947	0.830523	0.834856	0.897227	0.855304	0.741157	0.583787
mmu-miR-5103	0.894015	1.61412	1.03465	1.55016	1.96348	1.54191	1.83424	2.11829	2.70448	2.37071	3.20045	3.44224	1.00747	1.71347	4.08353	4.65352	3.328	3.06492			1.24736	1.27212	1.0781	1.60107
mmu-miR-5106																	1.21512	0.975087
mmu-miR-511-3p	14.3733	9.7098	23.6291	17.4202	35.418	23.1532	22.982	26.8498	38.8471	31.5798	115.244	96.9522	74.1948	55.0391	43.5398	33.4646	26.824	18.8104	166.063	154.403	57.2875	47.2407	17.8279	14.6627
mmu-miR-5114											2.15313	3.22603			1.12493	2.12505							1.22803	0.738105
mmu-miR-5121	1.51903	2.26721	2.25648	1.95304	4.03947	3.61471	1.55903	1.67386	3.19108	2.97404	5.42321	5.16994	4.09266	3.09238	5.62956	5.90293	7.84937	6.61632	5.92333	7.04234	1.74728	2.55928	1.01054	1.29279
mmu-miR-5123			0.654391	0.748155	1.22592	1.29087	3.78361	4.80083	3.50788	2.44777	5.10847	3.89532	1.54471	2.21703			1.94909	1.60653			1.95098	1.80765	2.14521	2.38227
mmu-miR-5128																	1.17231	0.704252
mmu-miR-5129-3p	0.79933	0.47013	0.477966	0.438325
mmu-miR-5129-5p	2.13705	1.74458	1.11297	0.754627	1.83079	2.09812	0.780687	1.01186	2.8315	2.73534							2.10223	1.47346			1.65103	1.10015	1.0759	0.595568
mmu-miR-5132-3p							0.881781	0.870005									0.972733	0.571808					1.02373	0.513803
mmu-miR-5134-3p	0.400398	0.365137							0.915098	0.600928					0.688579	1.07237
mmu-miR-5134-5p	0.654735	0.552406	0.654391	0.485701	1.10939	0.694392			1.54761	0.553188							0.987004	1.04131					0.615114	0.760206
mmu-miR-532-3p	436.145	423.558	325.72	310.277	574.915	578.35	738.02	647.879	357.961	365.504	181.097	181.262	344.669	369.995	487.009	501.956	392.281	346.987	500.627	423.925	1313.17	1340.6	211.194	212.773
mmu-miR-532-5p	320.325	346.376	248.175	269.098	658.685	687.155	958.716	907.6	404.968	434.99	229.747	234.129	306.285	388.224	616.093	629.437	409.688	393.4	632.919	544.962	1695.09	1740.96	263.697	262.445
mmu-miR-539-3p	25.4226	20.7798	35.6729	32.1239	68.9769	53.5362	18.9551	18.0907	31.989	31.5246	56.9034	56.7509	25.8014	34.0329	36.3313	29.1554	10.4189	8.05837	64.4303	57.0723	291.449	233.535	24.7819	20.2416
mmu-miR-539-5p	96.1783	83.2681	122.605	109.516	407.625	344.356	90.8016	85.8923	124.106	115.546	310.488	295.1	204.421	169.106	152.054	142.594	44.5119	35.5943	333.218	278.391	1528.24	1462.34	131.224	125.198
mmu-miR-540-3p	83.3792	95.0026	111.877	125.759	259.734	223.993	74.9922	85.3434	187.643	225.681	325.677	346.632	251.5	224.771	175.216	182.064	67.0696	58.801	377.329	373.624	883.204	852.489	301.386	306.174
mmu-miR-540-5p	113.059	102.357	141.831	133.666	190.806	150.977	86.4882	81.0118	230.318	231.472	520.263	435.798	187.499	187.494	197.718	146.665	59.2737	44.9737	391.365	321.507	705.012	623.093	357.125	241.977
mmu-miR-541-3p	6.9998	6.34952	9.69229	7.64241	6.74455	5.87984	2.34627	1.58664	7.74463	7.24655	14.8658	16.2862	6.71514	6.62586	6.82288	4.1222	2.18786	1.77379	6.39507	6.6151	16.9065	15.1723	4.35138	5.36452
mmu-miR-541-5p	1059.45	979.893	1364.03	1274.71	2153.49	1788.82	733.126	765.576	2079.02	2095.77	4328.2	4502.55	2485.97	2164.64	1916.93	1800.07	527.891	458.955	2628.02	2818.85	5265.8	5052.47	2039.95	2124.81
mmu-miR-542-3p	66.8287	61.7169	74.717	69.2783	546.677	413.691	2155.91	2083.05	885.049	792.808	228.396	218.342	637.087	413.35	343.682	296.011	575.953	540.038	919.353	762.365	1625.38	1302.35	3601.74	3443.66
mmu-miR-542-5p	30.2615	29.0518	33.4117	31.7626	219.544	183.354	870.167	758.101	405.875	378.962	91.593	78.1207	158.119	183.474	149.03	124.526	273.795	262.93	392.148	338.146	710.666	563.96	1862.01	1571.61
mmu-miR-543-3p	563.842	1952.66	746.833	3236.28	1376.51	3327.07	224.819	1026.46	467.389	2224.7	3561.61	6995.03	551.114	3146.49	676.539	2524.55	177.919	568.007	1450.04	4476.89	6298.38	11839.4	1786.53	3284.46
mmu-miR-543-5p	28.8148	22.3963	36.6045	32.6781	34.6267	29.4324	9.94439	8.49742	22.2688	19.8878	80.5043	81.6681	37.9063	24.846	24.7659	22.4065	7.76419	4.61245	32.794	32.4548	104.554	103.971	29.9911	31.2391
mmu-miR-544-3p	352.406	601.299	591.426	1179.24	178.979	177.49	28.2423	26.6313	29.1244	37.2353	61.6748	55.0758	67.4079	68.4341	54.4762	53.3075	14.0537	9.53563	102.33	106.396	458.725	437.828	91.9397	83.4934
mmu-miR-544-5p	58.5519	46.413	112.502	90.9161	12.3689	12.9883	2.09494	1.5614	2.72539	3.0511	6.13906	4.53263	7.38028	3.82398	5.50618	3.57119			8.17812	7.62979	28.156	22.7537	5.51625	6.18882
mmu-miR-547-3p	0.54206	0.497165					3.08483	3.19949			4.32298	3.67347			1.06692	1.67251	2.21277	1.73113					1.48891	0.811033
mmu-miR-551b-3p	735.347	711.384	714.415	690.922	898.214	1005.31	6.69341	7.12615	594.491	581.219	10.618	15.7636	20.3519	22.9169	40.202	31.3439	38.8622	42.7662	6.91935	10.2527	27.5851	16.2737	13.3622	30.5839
mmu-miR-551b-5p	5.24628	3.91619	2.94045	2.88354	3.26485	3.84501			5.54106	3.96043
mmu-miR-5615-3p			0.575283	0.702476
mmu-miR-5619-5p							0.899568	0.651462	0.567724	0.580103
mmu-miR-5620-3p	0.606293	0.902653	0.786952	0.440712																			0.865002	1.09611
mmu-miR-5621-3p	0.798596	1.14908	1.4758	1.6047	1.13296	1.02489	1.26791	1.49207	0.783498	0.522589
mmu-miR-5621-5p	0.234881	0.629194	0.652824	0.913468
mmu-miR-5622-5p									1.50526	1.0966
mmu-miR-5626-5p			0.614053	0.465594
mmu-miR-5627-3p	0.752353	0.758479	0.611702	0.651015	1.28047	1.21721			1.02222	0.807754													2.74713	1.96902
mmu-miR-5627-5p	0.354155	0.825865	0.578419	0.41583	1.07099	1.37155			0.545282	0.465075													1.42794	2.8342
mmu-miR-5709-5p									0.849806	0.658442
mmu-miR-574-3p	33.8574	35.6701	49.8137	48.8955	350.581	360.301	285.843	303.456	312.798	326.411	251.059	240.868	350.995	463.533	314.734	362.179	288.878	291.742	564.44	687.198	668.147	592.976	350.674	325.9
mmu-miR-574-5p	41.741	43.0406	55.985	60.2763	528.27	483.467	296.01	396.68	447.327	512.662	369.87	361.958	1179.89	885.12	581.842	645.417	497.366	559.032	757.604	901.621	644.917	701.118	804.201	960.612
mmu-miR-582-3p	5.60743	4.81102	14.0825	13.1917	26.4023	26.5963	6.36157	5.74335	14.361	11.7565	5.7853	4.48375	18.3957	15.6754	19.5043	18.2548	8.88282	9.8485	11.1608	10.63	4.594	4.56211	24.7122	25.3376
mmu-miR-582-5p	55.2346	45.5463	140.877	123.021	194.771	245.629	43.5724	44.2918	96.6033	89.25	43.9038	42.465	98.9438	118.755	147.792	132.116	76.012	70.595	98.7864	95.9478	34.6216	31.5296	105.392	106.835
mmu-miR-592-3p	10.7117	9.67021	16.6027	18.1039	6.0777	10.1279							1.61242	3.12362	8.41195	10.3695
mmu-miR-592-5p	6.46513	6.3981	10.7123	9.85382	5.92616	5.25331									4.71654	5.74061
mmu-miR-598-3p	653.666	564.982	1202.85	1101.86	181.404	239.78	46.5459	48.7156	38.9241	37.2819	19.8852	19.0292	76.9628	104.601	93.5023	88.9314	55.1862	54.3085	28.9072	30.4884	37.6133	34.6859	30.6277	34.4612
mmu-miR-598-5p	6.41043	4.18848	10.2082	8.59848	2.65997	1.99563
mmu-miR-615-3p	1.1245	0.778856	152.223	114.245	3.99564	1.06866	4.74075	11.547	4.68465	3.61903			618.305	558.38	293.846	289.191	1338.92	1307.13	979.397	1112.39	334.345	381.185	46.1659	40.8975
mmu-miR-615-5p			1.2843	0.621358									13.9555	9.31821	5.50863	4.67321	29.1997	25.417	16.707	13.5839	4.54681	5.19638	0.562939	0.707166
mmu-miR-6392-5p	0.445908	0.604903	0.747006	0.490476							2.88013	3.49487
mmu-miR-6418-3p	3.25456	3.52285	5.04695	3.948	4.6706	4.73294	3.09607	3.23208	2.68153	3.58715	2.86898	2.44961	3.02241	5.27818	3.90703	4.35832	3.01085	2.699	4.37549	3.94488	2.50108	2.19801	6.066	5.09161
mmu-miR-6516-5p			1.03543	1.15274																			0.975945	1.31489
mmu-miR-652-3p	809.152	744.827	1152.64	899.081	3222.55	2710.08	3751.43	3599.41	2536.65	2593.32	1417.12	1537.05	4425.5	3554.15	2676.32	2728.27	2899.08	3009.6	2409.22	2916.72	2965.55	2334.76	1239.95	1291.13
mmu-miR-652-5p	15.718	27.6418	21.5426	34.2198	63.2739	106.389	83.8396	150.474	74.8929	139.088	42.9178	67.4592	58.9318	145.781	90.6701	126.872	83.7724	139.225	64.8166	104.936	64.2508	92.6116	19.3832	30.1983
mmu-miR-653-3p	3.58159	2.73068	5.26018	3.81643	10.3003	8.45333	1.07836	0.957226	1.4614	1.15412							4.66047	4.6203			5.84697	4.20542
mmu-miR-653-5p	5.39201	4.56693	9.72401	6.43004	15.689	15.4721	1.64281	1.76108	2.40046	2.23726							8.27027	7.99873			10.7076	8.91169
mmu-miR-6538			0.632263	0.488089	1.55934	1.30475	2.57982	1.40166	1.5272	1.55559	2.05287	3.2749	1.00653	1.79176	1.21318	1.83483	2.87176	2.08857			1.84801	2.07835	4.5727	4.54797
mmu-miR-6539															1.79336	1.3626	3.4313	2.02361
mmu-miR-6540-3p	12.7875	13.1272	18.4335	19.316	12.3447	12.7605	2.2756	2.74035	0.984457	1.32425			2.81739	2.16056	2.59278	2.44969	1.43237	0.850495	5.33994	8.9246	2.29999	1.66477	1.13247	0.995559
mmu-miR-6540-5p	217.453	204.741	297.381	276.187	192.137	211.771	15.6521	19.0909	9.91763	7.96619	6.72403	6.38817	22.1528	22.2324	24.7687	22.2441	11.5271	7.01111	47.957	55.2399	17.4866	16.3385	7.27482	11.1644
mmu-miR-6546-3p																							1.01933	0.790038
mmu-miR-664-3p	38.7536	35.3947	54.2117	53.6963	27.6335	36.4825	49.2572	47.6028	34.135	34.7741	42.7005	41.2692	24.6549	40.4435	60.325	63.0041	36.2797	32.5238	36.3666	33.4257	24.5948	23.5635	57.6729	53.0332
mmu-miR-664-5p	2.48241	2.5246	3.7971	2.66438	3.42111	2.54728	2.78295	3.49055	1.87101	1.96187			4.96588	4.06485	4.54767	5.48978	3.34589	2.20658	3.12856	5.84729	1.3979	1.25119	2.83887	2.94247
mmu-miR-665-3p	368.312	1117.93	474.478	1568.88	1588.64	2186.81	321.928	882.505	618.005	2283.81	2897.29	3805.88	842.597	2263.44	696.56	1686.61	207.551	543.565	2285.35	3773.68	6395.38	8290.52	1593.81	2391.02
mmu-miR-665-5p	8.7108	5.73679	10.4685	9.66601	16.8596	12.5747	3.82621	3.68288	13.8056	12.3071	21.5703	18.0008	13.2269	11.4659	15.8147	11.8892	4.4362	3.14621	26.6091	22.175	72.0879	65.02	14.9989	11.0992
mmu-miR-666-3p	145.263	125.937	230.866	187.052	246.284	220.108	63.1336	63.437	137.654	142.842	476.015	470.824	225.645	163.097	157.132	145.209	34.0529	27.3722	225.825	194.097	982.374	964.152	212.907	179.987
mmu-miR-666-5p	66.2972	60.1142	101.066	85.8707	92.3339	92.979	17.6923	19.6186	52.5558	59.8633	109.996	114.743	82.3495	60.2694	61.5482	53.7358	13.9963	12.4753	88.4417	70.4899	418.517	403.751	118.821	112.883
mmu-miR-667-3p	251.551	271.444	352.2	377.952	459.869	451.041	144.533	142.95	297.135	308.282	1018.37	1050.83	371.967	410.379	359.983	328.841	92.8142	77.3207	588.583	545.357	1926.65	1949.79	465.127	417.678
mmu-miR-667-5p	4.43083	2.86545	7.18398	5.89287	8.45542	8.29335	1.51083	2.01637	4.92591	5.12191	7.91338	7.84327	6.37446	4.63387	4.94861	6.04555	2.1985	1.65705	8.17812	8.60417	37.766	35.8917	6.49219	5.22309
mmu-miR-668-3p	95.715	92.9023	143.355	142.834	130.052	126.339	40.6317	49.8458	64.5912	79.7492	199.163	214.084	78.2891	100.694	62.9074	79.5014	13.3727	12.5036	122.864	192.424	343.819	392.677	94.6401	106.714
mmu-miR-668-5p	1.66729	1.32029	2.99155	1.9844	0.916066	1.28858			0.804923	0.906918											2.20075	2.80677
mmu-miR-669a-3-3p	4.54237	3.57143	6.80551	6.76576	11.7304	9.7491	4.36632	4.18612	8.19151	7.23437	3.41493	4.44614	8.12913	9.22451	6.93128	5.73564	11.7301	13.4984	6.68414	4.62251	6.93894	5.63216	152.723	159.701
mmu-miR-669a-3p/mmu-miR-669o-3p	251.527	225.839	484.995	460.187	626.002	748.427	256.941	262.592	518.733	477.159	224.031	217.853	473.138	659.277	399.336	439.672	808.745	796.962	418.777	383.467	472.408	375.621	11046.6	12187.7
mmu-miR-669a-5p/mmu-miR-669p-5p	80.5837	85.524	167.735	157.421	221.214	213.854	78.0827	80.614	175.205	172.365	76.7885	75.1671	187.239	199.98	141.302	156.565	258.297	272.578	138.783	132.31	134.938	96.0891	4188.21	4251.11
mmu-miR-669b-3p	2.65453	1.44017	2.82375	2.58326	3.34701	6.21156	1.85249	1.99849	3.48696	3.49663			2.75462	3.82739	3.27403	2.52349	5.1346	4.56066			2.39698	2.42687	60.6419	65.8992
mmu-miR-669b-5p	69.1722	70.9021	132.567	132.422	189.098	180.903	77.888	82.3729	133.682	135.318	62.8252	61.5035	181.29	175.584	120.589	121.751	195.188	208.745	107.966	89.0999	113.504	74.98	2770.72	2766.04
mmu-miR-669c-3p			0.384175	0.603638																			11.9738	19.7233
mmu-miR-669c-5p	102.78	99.1041	195.088	174.888	196.636	200.815	77.7275	76.1795	104.396	105.469	53.3046	54.7919	188.819	182.922	98.8521	109.371	180.809	199.249	95.9417	91.3112	115.717	86.5317	2451.97	2802.19
mmu-miR-669d-2-3p/mmu-miR-669l-3p	1.61078	2.20414	3.79828	3.70634	4.42407	5.47446	1.57027	2.41352	4.83666	3.37792			3.29115	5.41594	2.22208	3.30564	6.38166	6.46032			3.04632	2.99965	41.2444	50.642
mmu-miR-669d-3p			0.767175	0.937661																			10.1389	14.4947
mmu-miR-669d-5p	97.1492	98.5035	186.796	172.527	188.02	170.915	70.8178	65.5755	118.021	109.467	54.5441	54.4987	169.2	139.411	105.511	98.8334	182.109	175.399	104.409	86.6196	108.021	78.6532	2656.81	2459.87
mmu-miR-669e-3p	2.5136	2.49797	4.91164	4.21523	6.23262	6.74809	1.66481	1.95439	3.338	3.25184			3.49265	5.01249	3.86398	3.81726	5.74737	6.10098			3.14518	3.13207	34.354	30.5994
mmu-miR-669e-5p	12.5185	12.252	25.0021	24.3251	26.3693	27.4067	9.59898	8.81887	17.3996	18.5894	6.71007	8.84341	20.9512	20.5651	14.3215	12.042	28.0987	23.6871	11.0583	13.2398	12.7799	11.9091	181.93	191.971
mmu-miR-669f-3p	26.3427	22.7352	46.3291	50.295	42.11	59.8083	27.4841	28.2145	35.7831	37.6708	16.239	18.7528	30.7868	55.4091	32.9006	34.4437	54.8656	55.217	28.6391	21.1839	35.4942	31.8644	674.99	760.854
mmu-miR-669f-5p	16.1264	17.93	35.245	33.8241	38.3489	35.2673	18.1177	18.556	27.0601	28.3071	10.5205	14.5529	37.0528	38.2607	23.8202	25.8004	39.1551	42.2261	21.7041	16.1639	17.9188	14.998	620.205	632.238
mmu-miR-669g																							0.717267	0.820977
mmu-miR-669h-3p																							1.83216	2.33366
mmu-miR-669h-5p	0.707576	0.804318	1.2843	1.64969	1.52969	1.47053			0.917132	0.991348					0.872708	1.09207	1.23642	1.6059					11.0259	9.48046
mmu-miR-669i	1.04301	1.59923	2.709	2.68619	1.25824	2.11658	1.12235	1.49623	0.850315	0.974206			1.88093	1.85423			1.81362	1.61375			1.29754	0.978198	30.3487	28.879
mmu-miR-669k-3p			0.440371	0.537852																			3.36445	3.64855
mmu-miR-669k-5p			0.709019	0.63738	0.768553	0.625304			0.760548	0.79798							1.18296	1.05511					10.2433	13.6815
mmu-miR-669l-5p	23.4412	22.754	43.2741	40.0738	58.9342	56.6461	19.718	20.0282	38.9752	38.8263	17.3476	20.2304	52.2183	51.6224	33.2735	32.3279	66.0145	67.4707	34.2419	30.0577	34.4461	28.8961	814.81	832.074
mmu-miR-669m-3p	2.46882	2.61354	5.6238	6.33698	4.36075	7.42068	2.23769	1.9218	3.81748	3.09644			3.49382	4.65611	3.17814	3.34503	5.51223	6.12857			3.2489	2.67435	43.7192	46.6002
mmu-miR-669o-5p	10.8644	10.9478	21.3979	20.419	28.5382	29.4233	12.0838	10.2384	19.0778	18.7092	9.47046	9.43184	19.5346	24.6898	15.8321	16.2527	29.2003	30.482	15.2512	14.8586	14.2804	11.7871	403.175	437.247
mmu-miR-669p-3p	0.610691	0.573953	1.03269	0.881424	1.6314	1.32198			0.959473	1.35117					0.814691	1.27408	1.68178	2.19999					29.1064	29.6955
mmu-miR-670-3p	78.5264	85.0738	75.5654	76.1692	55.0308	75.0854	42.4814	46.5885	1.24003	1.68407			5.91504	7.14182	5.77611	5.95206	3.03577	1.49638			1.99855	1.96915
mmu-miR-670-5p	53.5804	54.4393	51.4389	49.6205	44.7062	47.9378	26.5092	26.718	0.676374	0.675584			7.1802	3.5677	3.09234	2.64642	1.53567	0.799341
mmu-miR-671-3p	17.1335	22.4782	16.6184	24.2552	33.6911	36.2083	13.3803	14.7683	19.367	23.5509	13.4759	12.5583	23.2252	24.2958	15.3426	21.4274	33.5536	31.2227	28.3645	27.9119	23.613	17.928	9.69792	10.7545
mmu-miR-671-5p	278.671	364.858	293.065	394.061	520.353	509.261	229.528	258.821	352.507	414.323	223.165	226.545	678.312	449.046	356.674	379.253	523.527	571.712	487.185	475.614	323.406	255.136	334.026	358.122
mmu-miR-6715-3p	0.420587	0.331444	0.977276	0.85893					4.4046	4.46475	5.93297	3.34825
mmu-miR-6715-5p									0.697799	0.600928
mmu-miR-672-3p	35.0391	27.7609	30.4101	27.6115	9.46649	11.9532	6.74255	5.58043	43.1528	42.0437			1.81321	1.79476	2.29781	2.87279	8.26302	7.12			6.34913	4.99431	1.2868	1.31378
mmu-miR-672-5p	390.295	1688.6	342.905	1604.49	264.6	692.885	136.953	338.577	1182.26	2470.44	10.6125	16.9217	119.018	161.415	81.6129	140.74	258.37	414.696	322.039	541.68	170.669	341.712	50.9578	81.5188
mmu-miR-673-3p	8.82934	6.73346	10.3655	8.70893	23.8911	14.9379	2.2873	3.19851	11.0536	10.6563	11.6848	13.6938	10.8725	9.82776	8.86572	6.08494	3.18551	2.02425	14.6769	11.3777	74.1659	83.3077	13.4034	11.9633
mmu-miR-673-5p	97.1572	212.142	99.8779	205.645	1021.85	1263.29	96.1869	266.333	271.495	583.004	626.341	1012.94	301.325	613.722	261.412	458.431	80.9878	125.489	910.136	1214.17	4272.43	6148.7	414.837	535.327
mmu-miR-674-3p	222.735	205.194	227.472	218.747	499.146	544.512	276.53	291.203	503.081	483.808	113.264	123.097	252.74	329.996	288.699	295.49	490.134	489.043	489.644	460.975	313.142	313.266	114.576	104.385
mmu-miR-674-5p	799.269	762.923	913.995	855.18	1905.74	1741.44	811.448	886.809	1749.5	1696.74	416.975	393.282	1162.5	1188.94	1005.4	1010.82	1659.56	1631.36	1380.22	1443.74	855.088	825.121	352.432	322.821
mmu-miR-675-3p	2.50627	2.04624	4.36925	4.84783	53.6721	46.5477	74.6188	90.4506	46.0659	51.5544	141.873	145.093	112.341	120.43	130.512	151.912	49.8769	51.1636	54.7516	62.0283	106.352	103.734	132.652	120.82
mmu-miR-675-5p	1.5205	2.04233	3.6804	4.61742	45.8788	43.6206	68.1856	79.226	45.9291	52.4958	127.714	110.962	112.509	124.798	123.824	123.14	52.8273	51.6496	53.7753	56.9489	100.418	91.6938	111.594	106.616
mmu-miR-676-3p	206.254	196.896	197.626	166.607	311.362	292.684	283.944	263.792	235.786	278.964	183.414	215.143	447.041	399.633	138.966	145.968	232.126	229.893	441.265	458.39	406.256	455.418	33.89	27.5906
mmu-miR-676-5p	8.61132	8.69509	10.3753	10.0007	17.4329	18.1518	22.9853	21.4392	15.7469	14.6865	15.7906	14.4608	17.7936	21.3694	9.54422	9.42499	12.0291	13.3475	31.3866	27.5653	33.8929	34.8627	2.31272	3.09938
mmu-miR-6769b-3p	2.42184	2.55047	2.96707	2.62586
mmu-miR-6769b-5p			0.326412	0.341185
mmu-miR-677-5p	3.6359	4.0255	4.70546	5.04928	3.29852	4.53711	8.07505	12.8558	2.00465	2.48446	3.68234	4.39164	2.81927	2.79846	4.61577	4.39771	4.3329	4.29046	2.29943	2.91357	4.20042	4.35876	8.36773	7.89487
mmu-miR-679-3p	1.29735	1.21921	0.957499	0.704864	2.90581	1.61557	0.871018	0.746033	2.37446	1.7073	7.83817	5.80349	2.88628	2.12933	1.93199	2.10536					8.0994	7.60361	4.95331	3.36457
mmu-miR-679-5p	5.48556	5.02649	4.91399	3.78576	13.2823	10.3904	4.14588	3.99183	14.5915	13.7392	29.6814	31.8788	20.9994	15.8564	12.8485	11.2401	4.58571	3.57178	21.0366	17.4552	44.6398	39.4677	13.8224	8.47606
mmu-miR-6897-5p	0.845573	0.525371	0.711763	0.728048					0.76309	0.49199
mmu-miR-6898-5p																							0.821617	0.820977
mmu-miR-6899-3p	0.887417	1.27994	0.768743	1.27476																			0.962759	0.647502
mmu-miR-690	0.495083	0.331444	0.771486	0.526605	3.87643	2.55765	2.67999	2.44611	2.32704	1.44537			3.62549	4.07767	8.86298	8.00353	11.8296	10.7903	16.3905	10.9102	6.29409	6.10162
mmu-miR-6900-3p			0.555898	0.626133			0.842468	1.31027	0.589149	0.505447
mmu-miR-6901-3p									0.67434	0.403877
mmu-miR-6906-3p			0.518304	0.696004
mmu-miR-6907-3p			0.459756	0.438325
mmu-miR-6911-3p	1.17441	1.40648	1.26531	1.39917			1.0938	1.85247	1.63534	1.47965													1.82996	1.27512
mmu-miR-6912-5p			0.42177	0.879037
mmu-miR-6914-3p	3.25569	2.2202	2.569	2.77584	3.47701	2.20518	2.05702	2.6889	2.44331	2.54934			2.34857	4.24966	1.92955	2.08567	3.79466	3.55607			1.3009	2.59654	1.58007	1.86847
mmu-miR-6915-3p	0.563715	0.528115	0.88231	0.86779	1.21109	0.67365
mmu-miR-6915-5p	0.351955	0.568466	0.461716	0.499336
mmu-miR-6919-3p			0.539648	0.662262																			0.760651	0.769044
mmu-miR-6919-5p																							1.42354	1.7646
mmu-miR-6921-3p			0.613661	0.404583													0.947814	0.439999
mmu-miR-6923-3p																					3.85814	3.34
mmu-miR-6923-5p					4.77499	5.30059													5.65926	4.37212	28.63	34.4048
mmu-miR-6926-3p			0.803594	0.962543
mmu-miR-6927-5p					0.963214	1.07674	1.58524	0.935175	1.43946	1.32057													1.02592	0.606619
mmu-miR-6928-3p			0.32602	0.565122
mmu-miR-6929-3p																					0.550095	0.717957
mmu-miR-693-3p			0.365182	0.402196					0.850823	0.72573
mmu-miR-6931-3p	0.419854	0.675033																					2.05185	1.81986
mmu-miR-6932-3p	0.351955	0.365137																					1.43453	0.6254
mmu-miR-6933-5p																							1.12588	1.54803
mmu-miR-6934-3p			0.287642	0.390948
mmu-miR-6934-5p	1.15128	1.6247	1.78244	1.29895	1.46031	0.855598			1.26349	0.566645					1.11486	1.3626	0.815972	1.07803
mmu-miR-6935-3p																							0.715069	0.513803
mmu-miR-6935-5p	2.37267	2.71736	3.39589	3.29598	3.27494	2.86618	3.48828	3.82474	3.01053	3.19433			6.71114	5.35306	4.86799	3.57119	4.45047	5.14223			2.54864	2.40594	2.89267	3.02977
mmu-miR-6936-3p	0.610691	1.77436	0.957891	1.69945	1.38959	1.3139			1.24664	2.86751	2.4623	3.31252	2.34693	1.43838	1.88161	2.52349	2.56549	2.758			0.899477	1.17567	1.317	2.10382
mmu-miR-6936-5p			0.248871	0.528992																			0.767244	0.57568
mmu-miR-6939-3p	1.86033	1.65056	1.99332	1.93702	2.32789	2.14418	2.26436	3.02088	1.9419	2.57257			2.2162	3.13944	2.3885	3.20219	1.67816	2.28065			2.34718	3.05655	7.57851	6.6529
mmu-miR-6940-3p	3.49717	2.81687	3.91263	3.524	1.83954	1.50164	1.18179	0.651462	1.54862	1.85293			3.62502	2.64829	3.21845	2.30707	1.42172	2.20721	1.77647	3.67786			4.88135	5.4916
mmu-miR-6941-3p	0.234881	0.405488
mmu-miR-6943-3p	0.819519	0.761223	0.95985	0.85893	1.31887	1.27364			0.675357	0.49199					1.42754	1.20028							1.18245	0.57568
mmu-miR-6944-3p	73.3557	85.7485	74.0224	90.9728	58.109	77.0173	16.1108	22.4459	12.4553	15.4245	2.67121	4.03631	16.1762	18.9239	13.5548	16.8477	23.1388	32.3534	19.0932	23.0224	69.8187	87.3276	9.91761	13.0859
mmu-miR-6945-3p			0.595452	0.64624	1.03259	1.04792			0.545282	0.465075			1.54377	1.88546	1.14509	1.01827	1.28988	0.527871			3.20657	4.20084	2.23637	2.64746
mmu-miR-6945-5p																					1.34959	0.652897
mmu-miR-6946-3p	2.37413	2.05996	2.31934	2.1538	1.94732	2.50808	1.49959	1.89975	2.3311	2.33146	2.025	2.26725	2.08125	2.64829	3.13265	3.79259	3.59531	2.40524			2.04536	2.25031	3.00801	3.37451
mmu-miR-6948-3p	0.79933	0.86896	1.16799	0.96493					0.696782	0.509131													1.11928	1.9204
mmu-miR-6952-3p	1.35645	1.64507	1.75072	1.56857	1.69944	2.54956	0.961349	1.2157	0.93754	1.81624			1.34298	1.79176	1.57136	3.12861	1.5001	2.33117			0.949281	0.707496
mmu-miR-6953-3p	0.401864	0.319298	0.515952	0.72566
mmu-miR-6954-3p	0.352688	0.432523	0.346581	0.528992			0.90612	1.13583							0.824768	1.38229							1.84314	1.63201
mmu-miR-6956-3p	0.612891	0.365137			0.947051	1.18152							1.67967	1.42896			1.18658	0.718686					1.63884	1.2939
mmu-miR-6958-3p	5.84891	5.00652	8.50374	7.99075	4.92589	6.28522	5.48587	5.16858	1.24461	1.25569			1.9484	2.40143	3.38488	3.94993	2.37656	2.60391			2.79953	2.64297	3.77965	3.14469
mmu-miR-6962-3p			0.517128	0.560347
mmu-miR-6963-3p							0.985687	1.12113															1.22803	0.893906
mmu-miR-6964-3p																							2.60599	2.52592
mmu-miR-6967-3p	1.62398	1.79982	1.36459	2.00451	4.6807	5.64375	4.35743	4.75673	3.88278	5.04485	3.99708	6.17008	3.62619	3.66782	3.25113	5.21427	7.03725	6.58555	4.30849	7.03882	4.29742	4.28911	2.34292	2.04305
mmu-miR-6967-5p					1.04001	0.637962	0.688015	0.83742									0.937167	0.931151
mmu-miR-6968-3p			0.40356	0.696004
mmu-miR-6969-3p													2.08007	2.0981
mmu-miR-6970-3p	2.24167	2.72285	3.09044	3.60682	1.77757	2.22593	1.10925	2.31479	0.916623	1.27283					2.20192	3.47293	1.97401	1.6354					4.80557	6.77777
mmu-miR-6973b-3p			0.28725	0.404583
mmu-miR-6975-3p	4.17649	4.25704	6.77494	6.17883	8.83401	6.8576	6.71587	6.55554	3.60374	3.19801	4.32298	4.80898	5.36934	6.34135	4.47194	5.31751	6.18209	5.741	5.36099	6.5214	3.79787	4.20671	3.52317	4.11704
mmu-miR-6976-3p	0.401864	0.672289	0.364006	0.601251			0.718906	1.43425	0.413682	0.447933							0.751863	1.19477			0.650452	1.42316
mmu-miR-6977-3p	3.00501	2.35222	3.24513	2.82731	1.2953	1.11701			0.501416	0.746556							0.922895	0.550157
mmu-miR-6978-3p											2.49574	2.44585
mmu-miR-6979-3p			0.479141	0.926413
mmu-miR-6980-3p							1.67604	2.50074	1.87254	1.58491							1.37891	1.30556					1.88873	1.77565
mmu-miR-6981-3p																							1.2846	1.87731
mmu-miR-6983-3p																							2.54063	2.27841
mmu-miR-6983-5p																							0.869397	0.440874
mmu-miR-6984-3p	0.329567	0.460728
mmu-miR-6986-3p	0.515273	1.22469							0.763598	0.580103							1.06538	1.26099			0.850045	0.827155	1.18904	1.79776
mmu-miR-6986-5p	0.707576	0.665631	0.307811	0.571594
mmu-miR-6988-3p	1.54655	2.1677	1.95925	2.37773	1.69069	3.12652	1.66949	2.20135	2.20001	2.36943	2.78544	2.44773	3.48982	2.29191	2.59797	2.30209	2.97166	1.99538			1.89894	2.16663	5.13564	6.37445
mmu-miR-6989-3p	0.937326	1.40922	1.18894	1.7516	1.21109	0.9558	1.10691	0.935175	1.20023	1.75377							0.947814	1.84129					1.37577	1.21213
mmu-miR-6990-3p			0.442331	0.449572																			0.562939	0.420986
mmu-miR-6991-3p	0.909806	0.703238	0.710195	0.770649
mmu-miR-6994-3p	0.680056	0.537517															0.659211	0.740971					1.37577	0.974565
mmu-miR-6994-5p			0.401601	0.429465
mmu-miR-6996-5p			0.500878	0.63738													0.751863	0.747553
mmu-miR-6997-3p			0.422554	0.402196																			1.0781	1.2508
mmu-miR-6997-5p			0.673385	0.490476																			0.662894	0.626507
mmu-miR-700-3p	55.7356	60.5874	67.6061	75.9623	55.7879	65.9194	55.3417	61.6121	53.3377	60.1595	23.7708	25.2067	51.8433	68.4474	70.2298	71.9954	71.3514	72.0371	52.4469	51.0008	32.2329	31.0196	37.5746	41.8599
mmu-miR-700-5p	72.8232	69.7797	107.135	105.21	82.1457	82.2738	70.346	68.4668	86.244	89.0469	35.5253	39.8329	103.851	109.797	95.1805	98.6472	106.516	101.353	67.451	73.8262	43.8171	35.3447	62.4674	65.4893
mmu-miR-7000-3p	0.49435	0.552406	0.478357	0.863015
mmu-miR-7004-3p			0.899343	0.601251
mmu-miR-7006-3p	0.912005	1.04683	1.05246	2.15449					0.719732	0.767381							1.05474	1.02688					0.862804	0.676227
mmu-miR-7007-5p																			5.11788	8.14016
mmu-miR-7008-3p	0.585371	0.564552	0.863317	1.04435	0.954462	1.29087	1.01424	1.35438	1.1783	1.40868													2.25395	2.53365
mmu-miR-701-3p	7.12206	6.7268	4.85427	6.02646	3.74713	5.44579	2.00648	2.14769	3.59663	3.7512			1.94817	2.11992	3.61939	2.86782	7.27239	7.20065			2.8471	2.44779	1.0737	0.399991
mmu-miR-701-5p	32.791	29.8349	19.9154	19.0147	23.2661	16.9152	6.75098	7.34151	14.0218	13.224	3.13638	3.17528	12.3473	9.00546	9.6627	7.44256	26.6453	17.9593	10.6957	9.88588	9.44301	6.1409	2.51923	2.11709
mmu-miR-7015-3p	1.22358	1.14242	1.23242	1.2025	0.792127	0.627591																	0.812826	0.81214
mmu-miR-7016-3p	1.26983	1.10481	0.880742	0.967317	1.29664	1.11243			0.545282	0.465075							1.57848	1.55475
mmu-miR-7018-3p	0.801529	0.988843	1.4948	1.41689	6.41987	5.74852	18.1987	19.55	5.34112	5.74479	7.27831	6.20206	9.32751	7.18546	4.41393	5.411	7.88154	8.16385	10.8441	7.53961	11.688	12.6234	47.585	52.4951
mmu-miR-7019-3p	0.609958	0.835267	1.23124	0.890284																			2.00187	2.02538
mmu-miR-702-3p	87.4619	103.475	107.153	129.409	64.6859	100.725	39.7041	69.3034	38.5937	50.4602	47.1489	54.7675	49.0755	67.2969	53.6639	71.9268	45.6011	61.0236	48.4839	60.6836	47.4405	55.1492	153.635	161.734
mmu-miR-702-5p	2.54038	2.46662	3.03189	3.55535	2.6539	2.74539	1.14622	1.0518	1.13392	1.05623			1.81086	1.43838			1.59275	1.97968			0.599526	0.793478	1.63664	1.51047
mmu-miR-7023-3p	0.306445	0.340845
mmu-miR-7024-3p	0.894015	1.2341	1.01761	1.11183	0.954462	1.30353			0.718207	1.31688			1.2755	1.10381			1.35761	1.15868					1.03032	0.778988
mmu-miR-7024-5p	0.376543	0.432523	0.366358	0.429465
mmu-miR-7025-3p	0.609958	0.309896	1.10827	0.906306	2.71114	2.34107	1.41347	1.0371	3.81494	4.13793			3.56083	3.31443	3.03432	5.63738	6.26772	4.21639	4.08117	4.79936	3.29571	3.42599	1.94969	2.41321
mmu-miR-7032-3p																							1.7322	1.24196
mmu-miR-7033-3p	0.89035	0.590013	0.479925	0.634993			0.564453	0.917291	0.609557	0.715957													0.817222	0.792252
mmu-miR-7033-5p	0.656202	1.22195	0.901303	0.976177					0.806957	0.79798							1.23642	1.12196
mmu-miR-7036a-3p	0.375077	0.79883			0.582643	0.991488	0.754008	0.713448	0.631999	0.756329
mmu-miR-704									0.805431	0.698815
mmu-miR-7041-3p			0.440763	0.551487																	0.700257	1.4673
mmu-miR-7042-3p	0.327368	0.420377
mmu-miR-7043-3p			0.996269	0.73452	1.62872	1.68359																	0.717267	0.984509
mmu-miR-7044-3p	1.05587	0.929688	1.20872	1.25227					1.02426	1.57145													0.812826	0.851916
mmu-miR-7046-3p	1.12523	0.933602	0.938898	0.795531	0.892492	1.27364	0.882252	1.11378															1.02592	1.39666
mmu-miR-7047-3p	0.894748	0.893251	1.36224	2.1964
mmu-miR-7048-3p			0.343837	0.366066																			1.01713	1.42428
mmu-miR-7051-3p																							0.871595	0.420986
mmu-miR-7052-3p	0.422053	0.57121	0.498918	0.890284	1.77757	1.5477	3.52573	3.17744	1.42007	1.80647					1.6874	2.28737	0.972733	1.35672			1.69785	3.21218	2.08424	1.85631
mmu-miR-7054-3p	1.26909	1.05074	1.13157	1.66979	1.74659	1.99792	1.71115	1.0518	1.57005	1.58122							1.28626	1.81836	1.787	3.07379	0.950402	1.53236	1.38456	1.66184
mmu-miR-7056-3p			0.633047	0.585229
mmu-miR-7056-5p	0.419854	0.619792	0.404344	0.757015
mmu-miR-7059-3p																							0.717267	0.964621
mmu-miR-7059-5p																							1.11269	1.01545
mmu-miR-7060-3p			0.59702	0.51297																			1.48012	1.33478
mmu-miR-7061-3p			0.518304	0.329937																			0.510764	0.513803
mmu-miR-7063-3p	1.26323	0.645254	1.86037	1.22261	1.46638	1.68588			0.870215	0.746556			1.14055	1.59154	2.11612	1.72164					0.549722	2.16433	3.72748	4.40544
mmu-miR-7063-5p	0.888884	0.515969	0.78656	0.933575	0.908655	1.07903							1.07401	0.981877	0.688579	1.01827							0.964957	1.04639
mmu-miR-7064-5p	0.352688	0.54026	0.441939	0.528992
mmu-miR-7065-3p	1.73519	1.03468	1.63284	1.67934	1.88535	2.26619	2.51804	1.89975	1.48384	2.33515	1.52364	2.3105	1.81251	2.75182			1.82427	2.24456			1.49826	1.53465	2.68617	2.38449
mmu-miR-7066-3p	2.23247	1.96163	2.438	2.0478
mmu-miR-7066-5p	1.54875	1.68659	1.28391	1.7741
mmu-miR-7067-3p	0.490685	0.54026	0.767175	0.632605	1.34244	1.24481	0.81813	1.13902	1.0467	0.939923							1.36464	1.09968			0.848551	1.07694
mmu-miR-7068-3p	1.47865	1.24624	1.96043	1.30203	1.67721	1.63982	4.77585	4.04328	0.915098	1.3744			1.34275	1.6416							1.95024	2.66389	3.48418	3.63639
mmu-miR-7068-5p							0.418893	0.509606															0.767244	0.7591
mmu-miR-7069-3p	1.61812	1.56671	2.08986	1.59584	2.111	1.7112			0.981406	0.991348			2.28274	2.40143	1.95978	3.48268	1.54994	1.10753			1.64916	1.33718	2.49725	3.24524
mmu-miR-7069-5p					0.799538	0.625304
mmu-miR-7070-3p	1.24011	1.3054	1.8964	2.34092	1.50612	1.19647			0.632507	0.899551											1.14925	1.47776	4.37059	5.57999
mmu-miR-7070-5p	0.633813	0.804318	0.823371	0.856542			0.615	0.746033															1.43673	1.94029
mmu-miR-7075-3p	3.18999	2.98533	3.223	3.4623	3.57131	4.31719	2.91073	2.70459	2.6601	2.657					1.82359	2.74489	4.52885	3.87997			1.94912	1.89134	6.2467	4.88498
mmu-miR-7079-3p	0.70611	0.441925	0.805161	0.820413	1.32628	0.807253									0.824768	1.14617							1.02812	0.811033
mmu-miR-708-3p	247.74	236.752	98.5646	98.6047	104.533	113.538	14.1104	13.9002	41.9592	36.4631			41.3658	54.1543	60.5799	50.2185	99.279	88.9862	52.7055	33.2322	33.8641	34.6038	3.17772	3.3049
mmu-miR-708-5p	2740.36	2820.18	1139.58	1090.49	1764.91	1817.56	223.529	222.489	706.939	694.06	21.0912	24.5055	888.733	795.366	1019.48	923.363	1565.57	1498.87	1227.86	1060.7	352.998	229.267	55.7276	51.4576
mmu-miR-7080-5p	1.3124	0.816463	0.999013	0.748155
mmu-miR-7081-3p	0.490685	0.588843											0.671256	1.90129									0.862804	0.748049
mmu-miR-7082-3p	0.281858	0.614305	0.461716	0.52183									0.872985	1.51667	1.47548	1.69221							3.16673	3.15574
mmu-miR-7083-3p																							1.32359	0.461869
mmu-miR-7083-5p							1.34935	1.30709	1.68124	2.63618													1.77998	1.4276
mmu-miR-7088-3p											6.42319	5.76212
mmu-miR-7089-3p			0.248871	0.582841
mmu-miR-709											2.1587	1.90442	0.805272	1.29462	2.29017	1.96274	1.11885	0.784908					1.02812	1.695
mmu-miR-7091-3p									0.479482	0.49199													4.77481	4.69272
mmu-miR-7091-5p																							2.50384	1.61212
mmu-miR-7092-3p			0.267865	0.479229																			1.0737	0.636451
mmu-miR-7093-3p	1.95061	2.52069	2.36046	2.71006	2.93143	2.28007	2.33738	2.50809	1.74348	1.85662							1.77081	1.99475	1.9289	5.08301	3.29684	2.73941	0.969352	0.647502
mmu-miR-7115-5p	0.258736	0.396086
mmu-miR-7116-3p	0.609958	0.749077	1.20755	0.515358
mmu-miR-7117-3p	1.08412	1.69091	0.956715	1.86476									0.805272	1.10381	0.824768	1.18059							2.8103	2.6574
mmu-miR-7119-3p									0.58864	0.624159			0.805272	1.39773			1.00128	0.755405
mmu-miR-7211-5p			0.786952	1.05321
mmu-miR-7213-3p									0.436124	0.465075
mmu-miR-7213-5p									2.15615	1.8909													1.32799	1.11931
mmu-miR-7219-3p																							0.821617	0.912687
mmu-miR-7224-3p	4.29796	3.89073	3.66337	3.52331	6.03528	5.51945	2.09915	2.37677	0.80899	1.28997							2.37294	4.90621
mmu-miR-7226-3p	1.2445	0.933602	1.47698	1.46904	1.56068	1.40953			1.59401	0.960749			2.08077	1.67283	1.32922	2.01684	0.987004	1.29835					0.712871	0.913794
mmu-miR-7235-3p	0.397466	0.614305	0.78656	1.00992	0.737568	0.602275			0.959473	0.832263							0.698401	0.660315
mmu-miR-741-3p																							9.07238	43.6511
mmu-miR-741-5p																							0.769442	5.11592
mmu-miR-742-3p																							5.49264	22.8106
mmu-miR-743a-3p																							3.33205	16.8218
mmu-miR-743a-5p																							0.81942	4.16125
mmu-miR-743b-3p																							4.34918	23.204
mmu-miR-744-3p	13.2003	20.8139	14.2685	25.6888	23.0654	34.589	20.9316	29.3871	30.4476	40.0256	23.9546	23.5693	27.4601	40.1183	31.2279	38.2309	31.0137	43.2018	28.4644	30.4018	12.3878	20.2816	28.0288	31.7662
mmu-miR-744-5p	878.933	1255.81	939.961	1476.44	1418.29	1696.11	877.232	1046.03	1564.12	1768.25	977.65	1030.07	1701.51	1774.09	1447.65	1635.02	1881.68	2036.19	1414.28	1344.07	922.247	921.348	966.827	1082.55
mmu-miR-758-3p	70.1567	184.021	103.616	261.746	53.1851	74.6672	14.9552	21.6854	29.5044	38.9352	110.345	91.3556	55.568	57.9629	44.9897	54.4881	9.65982	9.67402	43.8523	48.3981	114.867	112.133	41.2257	47.8454
mmu-miR-758-5p	0.630148	0.48502	0.995093	0.879037
mmu-miR-760-3p	91.6624	109.814	105.426	118.3	67.604	93.218	5.98714	8.52683	7.08765	8.48397			25.7642	22.4946	12.6869	13.8128	8.04555	9.54094			4.94637	5.8401	14.0273	20.6471
mmu-miR-760-5p	7.27692	6.4784	7.03243	6.30324	4.45978	4.61077			0.589149	0.821211			1.20826	1.42896									1.83655	1.32373
mmu-miR-764-3p	13.582	12.1083	30.9116	27.5788
mmu-miR-764-5p	29.3726	45.327	59.3828	123.689
mmu-miR-7651-5p	0.82465	0.595501	0.72958	0.5491
mmu-miR-7653-3p					0.815701	0.568874	1.05823	1.14637	0.872757	0.729414	1.24508	2.13377					1.16868	1.04789
mmu-miR-7654-5p	3.01015	2.77535	4.0076	3.24314	5.53818	6.58215	5.03842	5.2705	8.45928	9.19496	4.56251	6.21708	9.26168	6.97924	6.52516	5.10108	7.62873	7.48125	4.9024	4.4089	3.09874	3.15758	4.68364	4.26731
mmu-miR-7655-3p	0.541327	0.494422	0.593884	0.662262			0.886463	1.00451	1.22013	1.72204			1.07401	1.26639			1.67816	1.35672
mmu-miR-7658-3p	1.52783	1.73518	1.88171	1.23624	2.69971	3.53876	1.44015	1.01186	1.35275	2.02916			1.87999	1.96375	1.87153	1.61841	1.9099	3.16786			0.749315	1.15246
mmu-miR-7658-5p	2.55984	1.7489	1.70529	1.97793	3.83874	4.53254	2.13238	2.27485	1.85264	3.12944			2.95305	2.48272	1.83367	2.61698	2.82555	3.94492	1.70947	3.8547	1.05076	2.26077
mmu-miR-7659-5p			0.555506	0.603638													0.933543	0.916717
mmu-miR-7662-3p	0.489219	0.780026	0.440763	0.585229	4.76222	4.84687			5.40692	5.19048			2.68385	2.68594	2.98638	3.54673	3.0002	2.99212					1.53009	1.0265
mmu-miR-7664-5p	0.304246	0.29775
mmu-miR-7666-3p	4.65212	4.05254	4.72406	4.5179	8.69525	10.0325	3.20419	4.8954	3.06972	3.77074			5.16596	4.91238	2.56255	3.10394	3.13205	2.88918			2.89541	2.17709	4.15587	4.0198
mmu-miR-7667-5p	1.83427	1.8915	1.39865	1.97962	2.73945	3.28879	2.57327	3.54519	3.84145	4.85629	3.31185	3.48924	4.22738	3.0988	4.51225	5.00283	8.33438	6.97185	4.22965	7.0353	1.29941	1.74029	1.88653	1.99333
mmu-miR-7669-3p	0.638211	0.951236	0.538081	0.795531	1.31887	1.82177	1.19958	1.47835	1.67666	1.50048			1.20779	2.31714	2.58026	1.76103	2.1165	2.24329			0.69951	1.12107
mmu-miR-7669-5p	2.60242	2.0964	2.49224	2.43158	3.84883	4.45537	3.34693	2.15823	4.27147	3.33258	2.62387	2.63009	1.94746	2.80787	2.65599	3.01044	4.57869	5.02295			2.04723	1.93777	2.64498	2.84525
mmu-miR-7674-3p	0.682988	0.669545	0.902871	0.675896			0.601896	0.611527	0.847264	0.553188													0.865002	0.955783
mmu-miR-7680-3p																					0.650452	0.816694
mmu-miR-7682-3p	1.31827	1.11421	1.59211	1.25635	1.97224	2.16492	2.15017	1.99432	0.89469	0.882409			1.94441	2.03563			2.17358	1.33443			1.45069	1.3035
mmu-miR-7685-3p																	1.57486	1.99475
mmu-miR-7685-5p																	2.49775	2.08983
mmu-miR-7687-3p	0.913471	0.607646	0.78656	1.26351					0.718207	0.939923
mmu-miR-7687-5p	0.351955	0.439181
mmu-miR-7688-5p	0.821718	0.761223			1.60649	1.3807			0.958965	0.939923			2.88393	2.44507			1.2115	0.954071			1.1485	1.25119	0.967154	0.997773
mmu-miR-7689-3p	6.11977	6.23864	13.1358	9.45878	21.3922	17.5242	6.19588	6.31495	1.39712	1.74159			4.09431	3.91468			9.5563	8.74882	7.42521	4.85276	34.9799	31.6396	0.712871	0.502752
mmu-miR-770-3p	69.0515	58.5541	129.892	110.309	18.7497	17.1812	2.13472	2.90009	3.99244	5.89666	12.6319	13.1899	13.8201	10.9628	6.18713	7.36379	1.5001	1.00459	5.73021	11.0003	21.1549	21.542	9.69352	10.6451
mmu-miR-770-5p	272.666	279.792	496.61	510.995	70.0011	66.7095	8.33996	11.1947	19.2471	22.7358	60.0231	59.3321	53.8756	35.5025	32.8399	32.9971	6.62768	4.70818	29.8743	26.2705	114.943	126.238	62.4625	71.0991
mmu-miR-7a-1-3p	259.078	213.081	259.358	221.744	99.7228	117.137	32.8487	29.7673	59.7566	59.8574	40.67	38.8347	51.0653	55.336	108.253	118.669	78.3283	63.9112	46.5458	41.3986	21.5455	18.7784	36.9051	32.7728
mmu-miR-7a-2-3p	152.544	153.731	128.069	138.913	63.4998	73.0976							8.05977	13.3989	10.5003	11.9238	1.15804	1.25441
mmu-miR-7a-5p	7023.95	20092.7	4611.79	19019	1458.22	9957.17	166.465	2108.48	225.925	3356.33	1020.66	3440.08	1675.24	5047.2	2244.34	9898.93	415.133	3842.09	433.223	2867.86	213.855	1780.14	932.685	3051.07
mmu-miR-7b-3p	7.88288	6.94071	6.83152	4.68151	7.96037	8.86116									3.30915	2.30209
mmu-miR-7b-5p	875.103	2049.39	638.216	1716.81	198.518	1992.87	1.79539	8.29138	7.72423	32.2311	2.16427	5.58165	391.999	373.97	314.17	526.672	9.55017	5.29037	1.71342	10.3726	1.24848	3.10298	1.28021	4.28941
mmu-miR-802-3p															11.3379	12.4742	5.52288	6.03539					2.90586	1.76903
mmu-miR-802-5p			1.21264	0.96493	3.6865	4.16178	1.52814	0.877356			6.13631	5.00259	13.1641	9.27798	82.534	58.7672	38.2757	37.6907					14.6414	14.3389
mmu-miR-8103	0.727032	0.95515	0.788128	0.926413	1.44281	1.945	1.96669	1.64127	1.94393	1.7661	1.11696	1.31786	2.01283	2.07627	3.85146	4.03866					0.649331	0.707496	0.964957	1.15136
mmu-miR-8112	8.58566	7.60008	7.33771	8.83196	13.2655	15.9561	7.25599	8.18628	10.6389	10.5939	4.78257	6.11933	10.0004	8.82106	8.96894	8.54437	8.78314	8.80719	13.6586	13.2967	8.84012	10.9969	12.941	10.5268
mmu-miR-8114	40.2117	42.4721	40.829	39.9609	102.528	106.733	55.8748	59.4862	46.8556	45.1644	161.028	174.71	62.2262	69.5109	36.1209	35.1864	44.2147	42.8424	53.3378	60.794	43.2909	39.3271	99.2062	90.5395
mmu-miR-871-3p																							4.59085	23.9818
mmu-miR-871-5p																							7.35719	34.4888
mmu-miR-872-3p	130.268	154.681	144.929	159.914	380.727	426.85	101.086	109.285	224.31	236.376	41.5724	45.0255	200.045	196.262	157.046	156.24	388.115	377.473	162.323	153.174	140.217	131.323	94.7132	92.5705
mmu-miR-872-5p	408.215	404.417	449.723	455.485	868.444	801.501	189.537	188.36	422.876	418.505	71.8637	69.5083	446.108	362.999	276.566	248.005	763.537	724.409	283.556	230.614	234.704	192.538	176.576	159.917
mmu-miR-873a-3p	6.73813	7.33288	9.30733	11.5158	2.97116	5.26719
mmu-miR-873a-5p.1	43.9908	51.4367	63.4752	74.8961	16.2487	26.1387							2.48447	1.94493
mmu-miR-873a-5p.2	48.8154	50.4201	74.7523	72.1956	17.4362	24.9495															1.65103	1.64156
mmu-miR-874-3p	128.384	141.124	206.564	209.671	111.162	110.898	205.514	172.623	117.602	138.281	104.35	111.846	90.8462	74.5222	69.3971	77.5737	275.203	258.191	32.2776	32.2044	84.9638	77.3518	11.3933	13.2053
mmu-miR-874-5p	7.73276	5.67292	9.31535	8.47136	7.20798	7.56114	15.6933	11.926	8.00122	9.53651	7.39529	5.65687	5.63525	4.47129	3.87162	3.64499	13.3118	13.735			6.54648	6.05262	0.92377	1.11048
mmu-miR-875-5p					9.09728	3.78262			0.828382	0.706183									2.5307	3.234
mmu-miR-876-5p	1.42801	1.75281	2.91675	1.78534	1.28789	1.0168
mmu-miR-877-3p	5.6812	7.00184	11.0193	9.85382	12.5293	13.7671	21.5821	19.943	9.15606	10.4298	14.1388	15.6546	14.9726	22.9704	18.6221	26.0766	11.4021	16.0696	17.2484	26.8534	9.00411	13.531	64.5473	63.0262
mmu-miR-877-5p	77.8262	85.0163	85.7983	93.2995	79.7674	106.51	65.2206	87.2543	54.4099	62.0028	47.3828	48.8982	70.2079	83.3411	69.7886	83.5855	63.9661	81.5679	47.1779	49.9433	49.4064	54.5275	296.013	356.008
mmu-miR-878-3p																							4.57327	19.1389
mmu-miR-878-5p																							1.64543	8.04183
mmu-miR-879-3p	2.51506	3.18358	4.75539	4.59493	2.96848	2.13838			2.07299	1.91045			2.61731	1.77294
mmu-miR-879-5p	28.2161	24.4672	68.02	61.7204	23.3719	24.7747	4.36071	4.17877	14.6186	12.6951			26.3718	15.5	7.24152	6.46368	5.86154	5.76392	8.55392	4.78273	5.1512	3.2053
mmu-miR-880-3p																							9.6573	41.6136
mmu-miR-881-3p																							8.79612	38.976
mmu-miR-883a-3p																							3.29966	18.3433
mmu-miR-883b-3p																							1.0759	4.82201
mmu-miR-9-3p	14559.3	12275.4	12226.4	10264	1163.46	1286.63	28.7614	26.894	11.0961	9.25458			33.907	30.8883	37.5387	37.6705	46.7415	51.4321	17.7111	57.015	4.69473	3.82094	10.3026	9.24621
mmu-miR-9-5p	146836	142294	111223	97876.6	34860.2	33518.2	249.002	263.204	106.693	81.561	4.34245	11.6483	789.985	711.281	1293.77	1167.75	1623.56	1527.38	182.424	550.535	103.268	107.691	73.0855	62.5069
mmu-miR-92a-1-5p	16.8568	15.633	10.2558	7.81318	44.8423	40.0784	12.4624	12.8306	21.5287	20.6775	22.2778	23.3926	35.0278	28.5138	27.6109	26.1105	77.7582	72.0747	39.072	32.1072	12.7357	10.6788	11.2736	9.03407
mmu-miR-92a-3p	4775.63	10606.8	3295.04	9516.84	16201.7	20536	7491	9234.4	11364.2	16448.7	9608.39	11681.6	9312.37	15358.4	12238.8	16548.4	20588.2	25881	12087.6	13283.4	5381.39	7532.43	7702.42	8695.87
mmu-miR-92b-3p	1710.2	2578.73	2007.74	3159.05	1032.24	1599.48	15.3418	24.9518	2326.16	2816.5	6.50115	11.0618	94.9466	139.125	64.3636	78.2184	203.595	243.117	32.1685	48.0959	32.4708	31.3187	130.429	183.072
mmu-miR-92b-5p	50.45	50.8189	52.0622	51.794	28.1893	40.1483			41.6507	45.2688			2.81739	2.79846			4.83875	4.34756					2.41268	2.80988
mmu-miR-93-3p	163.073	158.17	135.979	134.655	193.346	201.191	82.5286	78.6175	136.711	137.407	103.267	97.3923	142.234	140.843	120.627	123.523	222.692	213.03	111.119	116.274	67.5907	67.195	36.2456	43.7129
mmu-miR-93-5p	4955.08	5353.19	3289.37	3536.24	7256.37	8713.77	4256.54	4530.42	5205.85	6336.12	4445.02	4279.17	3848.04	6239.74	5048.7	5470.33	10453.3	10660.4	5059.94	4678.77	1508.86	1536.11	2435.84	2340.41
mmu-miR-96-3p					20.5253	24.0329			2.59735	2.28741			6.38316	5.37188	4.01788	3.13835	1.81362	1.59083	4.90898	5.3868			13.1145	19.9941
mmu-miR-96-5p	193.059	171.998	376.942	248.732	8376.63	7066.06	13.4444	11.7094	1339.02	1090.28	210.442	147.396	2510.34	1935.5	1620.09	1455.26	1077.77	903.826	2054.02	1735.29	30.2969	30.6591	10137.2	9092.61
mmu-miR-9768-5p	0.491418	0.374539	1.14939	1.13433
mmu-miR-98-3p	11.2141	13.3748	12.5732	10.8348	14.1337	15.9616	20.0624	22.7181	28.7071	31.5295	11.0582	10.0109	30.8778	27.9602	32.5446	32.9378	34.4518	39.6109	23.5817	25.0518	13.5933	15.0271	17.751	18.6394
mmu-miR-98-5p	517.656	473.722	480.032	411.481	708.428	598.379	705.032	800.487	1202.4	1102.82	385.034	394.951	1521.78	1261.44	1309.07	1277.59	1459.22	1455.18	956.721	869.547	496.613	536.083	682.164	755.597
mmu-miR-99a-3p	262.547	299.343	212.664	225.574	65.0905	67.3209	55.5172	75.3508	62.0056	72.8112	15.8268	17.7677	71.25	113.315	35.8113	36.1593	50.5604	55.8598	53.6492	54.6192	55.5867	45.2565	6.85302	6.25955
mmu-miR-99a-5p	18945.9	17387.2	14984.5	13660	7320.03	6772.06	6772.43	6601.38	4701.01	4859.52	1541.26	1521.5	12054.5	9148.98	3491.24	3306.59	4510.15	4414	4329.02	4981.25	5849.9	4752.93	789.68	760.495
mmu-miR-99b-3p	129.104	146.406	143.59	161.185	213.662	245.838	144.281	171.606	208.005	268.298	65.8335	81.9896	152.739	224.967	120.834	148.339	266.55	285.737	131.503	148.51	108.146	104.493	122.252	130.803
mmu-miR-99b-5p	3719.98	3351.57	4079.02	3708.1	5552.95	5801.06	4211.71	3993.15	5407.37	5561.31	1915.5	2050.86	4350.68	4854.38	3530.64	3396.65	6127.86	5844.56	3334.19	3364.59	3113.23	2679.41	2650.95	3048.06
