# Supplementary material for: ZSWIM8 destabilizes many murine microRNAs and is required for proper embryonic growth and development
Source: Genome Res. 2023 Sep;33(9):1482–96. doi: 10.1101/gr.278073.123 (PMC10620050; doi:10.1101/gr.278073.123)
Supplement: Supplement 3 [file Supplemental_Table_S2.xlsx]

## Sheet: Cluster composition
Composition of cells from E18.5 lung single-cell RNA-seq samples, organized by cluster.
Cluster	Genotype	Replicate	Number of cells	Fraction of cluster
0	Zswim8+/–	1	818	0.26899	0.519237
		2	761	0.250247
	Zswim8–/–	1	335	0.110161	0.480763
		2	512	0.168366
		3	615	0.202236
1	Zswim8+/–	1	490	0.212766	0.449414
		2	545	0.236648
	Zswim8–/–	1	721	0.31307	0.550586
		2	261	0.11333
		3	286	0.124186
2	Zswim8+/–	1	680	0.325203	0.580105
		2	533	0.254902
	Zswim8–/–	1	220	0.105213	0.419895
		2	258	0.123386
		3	400	0.191296
3	Zswim8+/–	1	315	0.154715	0.314833
		2	326	0.160118
	Zswim8–/–	1	527	0.258841	0.685167
		2	331	0.162574
		3	537	0.263752
4	Zswim8+/–	1	423	0.253902	0.446579
		2	321	0.192677
	Zswim8–/–	1	299	0.179472	0.553421
		2	324	0.194478
		3	299	0.179472
5	Zswim8+/–	1	224	0.138958	0.294045
		2	250	0.155087
	Zswim8–/–	1	321	0.199132	0.705955
		2	381	0.236352
		3	436	0.270471
6	Zswim8+/–	1	331	0.231631	0.463261
		2	331	0.231631
	Zswim8–/–	1	99	0.0692792	0.536739
		2	353	0.247026
		3	315	0.220434
7	Zswim8+/–	1	296	0.215901	0.47046
		2	349	0.254559
	Zswim8–/–	1	159	0.115974	0.52954
		2	243	0.177243
		3	324	0.236324
8	Zswim8+/–	1	285	0.247611	0.530843
		2	326	0.283232
	Zswim8–/–	1	154	0.133797	0.469157
		2	194	0.168549
		3	192	0.166811
9	Zswim8+/–	1	127	0.217839	0.421955
		2	119	0.204117
	Zswim8–/–	1	113	0.193825	0.578045
		2	86	0.147513
		3	138	0.236707
10	Zswim8+/–	1	127	0.297424	0.480094
		2	78	0.18267
	Zswim8–/–	1	79	0.185012	0.519906
		2	72	0.168618
		3	71	0.166276
11	Zswim8+/–	1	72	0.195122	0.355014
		2	59	0.159892
	Zswim8–/–	1	87	0.235772	0.644986
		2	63	0.170732
		3	88	0.238482
12	Zswim8+/–	1	149	0.442136	0.896142
		2	153	0.454006
	Zswim8–/–	1	1	0.00296736	0.103858
		2	12	0.0356083
		3	22	0.0652819
13	Zswim8+/–	1	39	0.125806	0.374194
		2	77	0.248387
	Zswim8–/–	1	72	0.232258	0.625806
		2	63	0.203226
		3	59	0.190323
14	Zswim8+/–	1	68	0.234483	0.465517
		2	67	0.231034
	Zswim8–/–	1	19	0.0655172	0.534483
		2	72	0.248276
		3	64	0.22069
15	Zswim8+/–	1	44	0.230366	0.460733
		2	44	0.230366
	Zswim8–/–	1	30	0.157068	0.539267
		2	31	0.162304
		3	42	0.219895
16	Zswim8+/–	1	13	0.081761	0.157233
		2	12	0.0754717
	Zswim8–/–	1	54	0.339623	0.842767
		2	46	0.289308
		3	34	0.213836
17	Zswim8+/–	1	19	0.172727	0.590909
		2	46	0.418182
	Zswim8–/–	1	20	0.181818	0.409091
		2	17	0.154545
		3	8	0.0727273
18	Zswim8+/–	1	10	0.103093	0.175258
		2	7	0.0721649
	Zswim8–/–	1	32	0.329897	0.824742
		2	20	0.206186
		3	28	0.28866
19	Zswim8+/–	1	51	0.542553	0.797872
		2	24	0.255319
	Zswim8–/–	1	5	0.0531915	0.202128
		2	6	0.0638298
		3	8	0.0851064
20	Zswim8+/–	1	13	0.2	0.307692
		2	7	0.107692
	Zswim8–/–	1	23	0.353846	0.692308
		2	1	0.0153846
		3	21	0.323077

## Sheet: Marker genes
20 most-enriched genes per cluster in single-cell RNA-seq from E18.5 lungs, relative to the union of other clusters. p-values from Wilcoxon rank-sum test.
Cluster	Gene	Fold change (log2)	p-value	adjusted p-value
0	Axl	3.38284	0	0
	Ear2	4.29701	0	0
	Abcg1	3.54555	0	0
	Psap	3.02929	0	0
	Adipor2	3.04714	0	0
	Laptm5	3.18039	0	0
	Cd44	3.16192	0	0
	Cytip	3.34301	0	0
	Sirpa	3.00001	0	0
	Tcf7l2	2.8273	0	0
	Sh2d1b1	3.51652	0	0
	Trf	2.98919	0	0
	Baz1a	2.86541	0	0
	Mpeg1	3.19967	0	0
	Cybb	3.4932	0	0
	Naaa	3.09224	0	0
	Cotl1	2.75813	0	0
	Ccr2	3.33757	0	0
	Ciao2a	2.52115	0	0
	Aprt	2.33237	0	0
1	Gm42418	2.37751	0	0
	Hbb-bs	3.19041	0	0
	Hba-a2	3.08684	0	0
	Hba-a1	3.42882	0	0
	Lars2	2.26084	0	0
	Sftpc	2.96267	0	0
	Hbb-bt	3.06327	0	0
	AY036118	1.28106	0	0
	Scgb3a2	3.76258	7.90837e-186	9.06967e-185
	Wfdc2	2.5047	3.70062e-99	2.24791e-98
	Scgb1a1	3.62877	8.4778e-89	4.7667e-88
	Rps19	0.301104	6.41398e-83	3.44382e-82
	Rpl39	0.214617	4.56569e-81	2.40443e-80
	Rpl32	0.233547	2.73655e-73	1.34699e-72
	Rps24	0.215323	9.86572e-71	4.75124e-70
	Krt19	2.05519	2.04699e-66	9.55177e-66
	Rpl23	0.178569	4.27696e-60	1.89039e-59
	Rps27	0.0960196	8.89109e-60	3.92134e-59
	Rpl37a	0.121428	7.39579e-58	3.2066e-57
	Rps14	0.124106	7.09026e-57	3.04889e-56
2	Cldn18	6.2922	0	0
	Ctsh	3.65613	0	0
	Ager	5.74234	0	0
	Ptprf	4.52439	0	0
	Tmem213	5.28525	0	0
	Tspan8	5.30637	0	0
	Sfta2	5.03235	0	0
	Cldn3	4.9287	0	0
	Scd2	3.29327	0	0
	Alcam	4.19038	0	0
	Emp2	4.74713	0	0
	Nkx2-1	4.61761	0	0
	Atp1b1	4.58912	0	0
	Nedd4l	4.24255	0	0
	Muc1	4.809	0	0
	Sfta3-ps	4.13686	0	0
	Gja1	4.2516	0	0
	Bsg	2.57947	0	0
	Lmo7	5.08594	0	0
	Npc2	2.5385	0	0
3	Col1a2	7.08351	0	0
	Col1a1	7.06405	0	0
	Col3a1	7.03257	0	0
	Col6a2	5.39921	0	0
	Col6a1	5.28034	0	0
	Mfap4	6.18445	0	0
	Rbp1	5.20238	0	0
	Ogn	6.86598	0	0
	Lox	5.66952	0	0
	Cdh11	5.41939	0	0
	Col5a1	5.39976	0	0
	Bgn	4.6104	0	0
	Peg3	4.79581	0	0
	Fbn1	4.6465	0	0
	Gpc3	4.87557	0	0
	Col6a3	4.96344	0	0
	Mdk	4.42705	0	0
	Col14a1	5.20541	0	0
	Sparc	4.24932	0	0
	Mgp	5.46793	0	0
4	Cdh5	6.35901	0	0
	Pecam1	5.94304	0	0
	Ramp2	5.52828	0	0
	Egfl7	5.72885	0	0
	Cd93	5.44887	0	0
	Cldn5	5.94667	0	0
	Esam	5.13729	0	0
	Emcn	5.89119	0	0
	Pcdh17	5.72717	0	0
	Cav1	4.35932	0	0
	Icam2	5.30269	0	0
	Rasip1	5.53819	0	0
	Kdr	5.48051	0	0
	Mest	5.01334	0	0
	Tcf4	3.36709	0	0
	Ecscr	5.4333	0	0
	Tie1	5.77707	0	0
	Cd34	4.52953	0	0
	Scn7a	5.97006	0	0
	S100a16	3.94626	0	0
5	Pf4	7.71787	0	0
	Apoe	5.73908	0	0
	C1qb	7.81626	0	0
	C1qa	8.46642	0	0
	C1qc	7.93123	0	0
	Maf	4.85912	0	0
	F13a1	4.29809	0	0
	Ftl1	1.84462	0	0
	Selenop	3.58059	0	0
	Fcrls	8.36152	0	0
	Mrc1	5.36668	0	0
	Clta	1.84888	0	0
	Aif1	4.8542	0	0
	Ms4a7	7.26546	0	0
	Blvrb	3.29756	0	0
	Cx3cr1	5.19682	0	0
	Lgmn	3.87358	0	0
	Itm2b	1.53582	0	0
	Ctsb	2.84779	0	0
	Rps29	1.03335	0	0
6	Plac8	7.75453	0	0
	Ifitm3	4.5747	0	0
	Ms4a6c	4.37236	0	0
	Cd52	4.18956	0	0
	Lyz2	4.86358	0	0
	Ifitm6	5.83367	0	0
	Lst1	3.87563	0	0
	Fcer1g	3.48127	0	0
	Tyrobp	3.65535	0	0
	Ly6e	3.1913	0	0
	Coro1a	3.1737	0	0
	Fyb	3.94142	0	0
	Ctss	3.43622	0	0
	Thbs1	4.08551	0	0
	Wfdc17	4.657	0	0
	Ifi204	4.14329	0	0
	Srgn	3.32567	0	0
	Itga4	3.36348	0	0
	Clec4a1	3.81496	0	0
	Samhd1	2.71436	0	0
7	Mki67	4.79396	0	0
	Birc5	4.60263	0	0
	Pclaf	4.80865	0	0
	Ccna2	4.76824	0	0
	Cdca3	4.36827	0	0
	Hmgb2	3.08422	0	0
	Tpx2	4.30231	0	0
	Cdca8	4.05915	0	0
	H2afz	2.28597	0	0
	Nucks1	2.59712	0	0
	Bub1b	4.06118	0	0
	Racgap1	4.09775	0	0
	Anp32b	2.13499	0	0
	Tuba1b	2.90859	0	0
	Tuba4a	3.25426	0	0
	Ube2c	4.14624	0	0
	Kif15	4.34159	0	0
	Smc2	3.46716	0	0
	Top2a	4.66104	0	0
	Ran	2.16194	0	0
8	S100a9	10.3751	0	0
	Cstdc4	9.98243	0	0
	S100a8	8.87384	0	0
	Stfa1	9.46892	0	0
	Cstdc5	10.059	0	0
	Stfa2l1	9.86276	0	0
	Csta2	8.30683	0	0
	Slc7a11	5.82936	0	0
	Stfa2	10.2654	0	0
	Csta3	10.0724	0	0
	Srgn	4.72257	0	0
	Wfdc21	8.10814	0	0
	Il1r2	6.9502	0	0
	Slpi	7.72072	0	0
	Thbs1	4.63998	0	0
	Grina	4.45539	0	0
	Pglyrp1	6.34353	0	0
	Hp	4.75775	0	0
	Clec4d	5.58753	0	0
	Mxd1	4.49231	0	0
9	Hhip	7.01257	0	0
	Mylk	4.83248	0	0
	Mgp	5.95921	0	0
	Ednrb	5.26535	1.0971e-306	6.17776e-303
	Palld	4.50382	2.75882e-301	1.24279e-297
	Nrep	3.91634	1.49265e-298	5.6034e-295
	Mmp2	5.21527	3.56314e-297	1.14652e-293
	Gm13889	5.18875	1.64453e-286	4.11571e-283
	Mfap2	4.13647	1.58526e-282	3.57064e-279
	Igf1	4.65003	3.28402e-275	6.72449e-272
	Tgfbi	3.69417	4.59455e-267	8.62396e-264
	Aldh2	3.15565	8.57687e-267	1.48604e-263
	Nfib	3.51908	9.52757e-264	1.49551e-260
	Eln	5.06856	9.95948e-264	1.49551e-260
	Bgn	4.03744	5.93522e-262	8.35531e-259
	Iigp1	5.63032	1.88768e-261	2.50106e-258
	Fmo2	5.3914	5.81164e-260	7.2723e-257
	Col6a3	3.9041	1.70294e-257	2.01879e-254
	Pdgfra	5.42323	3.02178e-255	3.40312e-252
	Nexn	4.6962	1.988e-250	2.13227e-247
10	Spint2	3.96381	1.43248e-197	3.22651e-193
	Cbr2	5.6663	4.33223e-196	4.87896e-192
	Krt8	4.37685	2.98924e-195	2.24433e-191
	Gsta4	4.75913	1.29767e-194	7.30717e-191
	Wfdc2	5.02149	3.46544e-193	1.56111e-189
	Krt18	4.18669	9.8343e-189	3.6918e-185
	Scgb3a2	6.10025	2.93051e-185	9.42953e-182
	Cldn7	3.99667	1.19662e-183	3.36908e-180
	Cldn10	4.88198	1.79154e-180	4.48364e-177
	Mia	4.60482	1.75649e-177	3.95632e-174
	Aldh1a7	4.78549	1.17342e-175	2.40275e-172
	Cd24a	3.64443	2.29966e-175	4.31646e-172
	Epcam	3.76342	2.49713e-174	4.32656e-171
	Smim22	4.18637	2.46857e-170	3.97157e-167
	Bsg	2.5176	1.48201e-168	2.22538e-165
	Scgb1a1	5.78498	1.02704e-166	1.44581e-163
	Sec14l3	4.52453	3.52774e-166	4.67405e-163
	Dcxr	3.45545	2.619e-161	3.27724e-158
	Pebp1	2.33482	7.84375e-161	9.29855e-158
	Alcam	3.24399	1.98991e-160	2.24104e-157
11	Tagln	7.39312	3.31586e-229	7.46864e-225
	Acta2	6.78472	3.63828e-225	4.09744e-221
	Cald1	4.88713	4.75042e-220	3.56662e-216
	Tpm2	4.97314	2.40347e-210	1.35339e-206
	Eln	6.35187	2.95649e-208	1.33184e-204
	Tpm1	4.00248	1.39205e-205	5.22577e-202
	Notch3	5.23232	2.21107e-200	7.1146e-197
	Gpc6	5.68422	3.69521e-199	1.04039e-195
	Myl9	5.00869	2.71558e-198	6.7962e-195
	Ndufa4l2	4.89852	1.656e-197	3.72997e-194
	Myh11	5.73984	3.48483e-194	7.13567e-191
	Hspb2	5.40456	1.61427e-186	3.02998e-183
	Zfhx3	3.10492	2.76298e-185	4.78718e-182
	Csrp2	4.0382	9.76895e-184	1.57168e-180
	Spon1	6.26997	8.44211e-179	1.26767e-175
	Fxyd1	4.19307	1.01109e-178	1.42336e-175
	Mef2c	3.5	5.11073e-178	6.77142e-175
	Crip1	3.21756	1.22661e-177	1.53489e-174
	Map3k7cl	7.84005	3.78743e-172	4.4899e-169
	Fabp4	5.1821	7.53783e-172	8.4891e-169
12	Fth1	3.40516	7.47184e-210	1.68296e-205
	Ccl6	5.707	8.39599e-206	9.45557e-202
	Lgals3	3.73894	1.1231e-197	8.43225e-194
	Ccl9	4.87509	4.86103e-197	2.73725e-193
	Wfdc17	5.84314	1.11017e-185	5.00107e-182
	Hilpda	4.96282	5.9763e-184	2.2435e-180
	Rnh1	3.00657	1.99132e-183	6.40751e-180
	Bcl2a1b	3.78214	2.238e-180	6.30108e-177
	Ftl1	2.32983	9.74487e-180	2.43882e-176
	Sod2	3.14877	1.89693e-178	4.27264e-175
	Il1rn	4.387	2.24222e-178	4.59125e-175
	Cstb	2.86926	7.35671e-176	1.38086e-172
	Cxcl2	5.50429	3.71302e-175	6.43324e-172
	Lilrb4a	3.46307	1.09548e-174	1.76247e-171
	Bcl2a1d	3.59375	2.8437e-173	4.27011e-170
	Bcl2a1a	3.60554	1.72775e-172	2.43224e-169
	Lilr4b	3.80261	1.40499e-171	1.86152e-168
	Clec4n	3.81311	1.04455e-166	1.30708e-163
	Slfn2	3.26273	4.15922e-164	4.93065e-161
	Malt1	3.64207	1.46401e-162	1.64877e-159
13	Upk3b	9.8388	2.24243e-200	5.05084e-196
	Gpm6a	8.88884	8.3023e-195	9.35005e-191
	Aldh1a2	8.06393	1.2351e-187	9.27314e-184
	Upk1b	9.23215	1.70926e-187	9.62486e-184
	Rspo1	7.33393	4.0166e-187	1.59666e-183
	Cpe	6.32192	4.25322e-187	1.59666e-183
	Hspb1	5.69007	1.65186e-186	4.67197e-183
	Rarres2	5.97224	1.65938e-186	4.67197e-183
	Aebp1	5.54568	8.02374e-186	2.00808e-182
	Lrrn4	10.942	9.41039e-186	2.1196e-182
	Igfbp6	5.39208	3.08219e-180	6.3112e-177
	Wt1	8.47494	1.88824e-179	3.54423e-176
	Sparc	4.64534	1.17047e-177	2.02798e-174
	Gm12840	5.91233	4.24648e-177	6.83198e-174
	Gpc3	5.18446	5.72276e-176	8.5933e-173
	Gas6	5.0846	4.90545e-175	6.90565e-172
	Cd2ap	3.37396	2.43322e-174	3.22387e-171
	Igfbp5	6.22098	1.07169e-173	1.34104e-170
	Sulf1	5.69779	6.29576e-172	7.46346e-169
	Tmem151a	7.98001	4.47389e-171	5.0385e-168
14	Sub1	2.08572	1.09744e-127	2.47187e-123
	Rpl38	1.08257	1.35034e-120	1.52075e-116
	Rgs1	6.20266	1.64419e-119	1.23445e-115
	Rac2	2.74883	6.35866e-115	3.58056e-111
	Ptprcap	6.86753	1.26838e-113	5.71378e-110
	Itgb7	5.05194	2.39748e-106	9.00013e-103
	Srgn	3.29011	9.45349e-104	3.04186e-100
	Nabp1	3.18416	1.44618e-101	3.61931e-98
	Hcst	3.44631	4.62705e-101	1.0422e-97
	Rps11	1.00575	1.31638e-98	2.69548e-95
	Rps24	0.858296	1.40399e-97	2.6353e-94
	Rplp1	1.04223	4.49629e-97	7.79035e-94
	Rps23	1.0678	1.97323e-95	3.17465e-92
	Neurl3	3.2939	1.45338e-92	2.1824e-89
	Rps13	0.91868	2.88311e-91	4.0587e-88
	Tnfaip3	3.25108	4.01026e-88	5.31336e-85
	Cd52	2.92556	3.60252e-84	4.50795e-81
	Sh3bgrl3	1.79071	2.14575e-83	2.54373e-80
	Stk17b	2.39565	5.99645e-83	6.7532e-80
	2023-09-01	4.99389	1.46139e-82	1.56744e-79
15	H2-Aa	10.8764	4.09615e-125	3.63764e-121
	H2-Ab1	10.5927	4.83619e-125	3.63764e-121
	H2-Eb1	10.6435	4.84502e-125	3.63764e-121
	Cd74	8.35235	1.23156e-124	6.93492e-121
	H2-DMa	4.63723	2.59053e-119	1.16698e-115
	H2-DMb1	6.17244	1.86253e-116	6.99192e-113
	Cst3	4.01437	8.57662e-108	2.75971e-104
	Crip1	3.07974	3.43893e-93	9.68232e-90
	Plbd1	4.22633	1.79163e-91	4.48386e-88
	Bcl2a1d	3.3505	2.11521e-89	4.76429e-86
	Gng10	2.99782	4.96672e-89	1.017e-85
	Sh3bgrl3	2.06456	9.05012e-83	1.69871e-79
	Cd52	3.53304	2.39311e-80	4.14634e-77
	Lsp1	2.58498	1.03456e-78	1.66446e-75
	Rps11	1.06947	3.86977e-78	5.81084e-75
	Gm2a	2.57816	8.29736e-75	1.16806e-71
	Ifi30	2.46616	2.02822e-73	2.68727e-70
	Bcl2a1a	3.0892	3.08432e-73	3.85952e-70
	Bcl2a1b	3.05646	2.20362e-71	2.61233e-68
	Tmsb4x	1.40366	1.5962e-70	1.79764e-67
16	Gucy1a1	6.97097	3.72377e-104	8.38742e-100
	Ndufa4l2	5.86537	6.81167e-101	7.67131e-97
	Gnas	3.11295	3.3839e-99	2.54063e-95
	Gucy1b1	6.0744	1.63226e-96	7.76917e-93
	Mfge8	4.45974	1.72464e-96	7.76917e-93
	Itga1	5.55277	4.03519e-96	1.51481e-92
	Cox4i2	6.1704	1.77944e-95	5.72573e-92
	Higd1b	8.42526	1.1386e-94	3.20572e-91
	Pdgfrb	5.65965	1.10343e-93	2.76152e-90
	Fermt2	4.01764	4.79777e-93	1.08065e-89
	Ppp1r14a	5.00545	1.01599e-90	2.08038e-87
	2023-09-04	5.18029	5.43387e-90	1.01994e-86
	Gm13889	4.85038	7.63946e-89	1.32362e-85
	Maged2	4.25492	1.02003e-86	1.64108e-83
	Cald1	4.29657	2.38247e-85	3.57751e-82
	Pde5a	5.55275	3.26058e-85	4.59008e-82
	Gjc1	4.80891	1.23671e-84	1.63856e-81
	Rasgrp2	3.93392	1.81491e-83	2.27106e-80
	Ebf1	4.96603	2.1531e-83	2.55244e-80
	Gng11	4.15115	4.30852e-83	4.85225e-80
17	Ctla2a	8.45986	3.63882e-73	8.19608e-69
	Nrgn	9.05755	8.49073e-72	9.56226e-68
	Pf4	7.79263	2.75883e-64	2.07133e-60
	Clec1b	9.64791	1.77596e-60	1.00005e-56
	Gng11	5.64123	9.0129e-60	4.06013e-56
	Cd9	4.10037	1.9275e-59	7.23584e-56
	Tmsb4x	2.45946	2.28826e-59	7.36296e-56
	Gp9	9.37841	3.26024e-59	9.1792e-56
	Myl6	2.74389	1.76533e-58	4.41802e-55
	Treml1	9.28385	1.1959e-54	2.69366e-51
	Itga2b	8.35718	5.98325e-54	1.22515e-50
	Rgs10	5.30701	1.90838e-53	3.58202e-50
	Hist1h2bc	5.42894	2.54329e-52	4.40654e-49
	Myl9	6.10227	3.63037e-52	5.84074e-49
	Gpx4	2.99508	1.5396e-49	2.31186e-46
	Hist1h1c	5.83321	1.08063e-48	1.52126e-45
	Ctla2b	6.63627	3.23203e-48	4.28224e-45
	1810058I24Rik	4.18208	3.52501e-47	4.41096e-44
	Tsc22d1	4.21401	6.76593e-47	8.02083e-44
	Actg1	1.73262	7.56698e-43	8.52193e-40
18	Mmrn1	9.20156	1.10161e-64	2.48126e-60
	Flt4	7.03939	2.83385e-64	3.19148e-60
	Gnas	3.51298	2.52378e-63	1.89485e-59
	Klhl4	7.83571	9.81271e-62	5.52554e-58
	Reln	10.1938	6.50405e-61	2.92995e-57
	Prox1	7.65167	1.86787e-60	7.012e-57
	Igf2	5.34818	2.99853e-60	9.64842e-57
	Col18a1	5.37089	6.14274e-60	1.72949e-56
	H19	5.31607	3.70981e-59	9.28441e-56
	Arl4a	4.64664	2.41888e-58	5.44828e-55
	Stab1	5.21556	4.46358e-58	9.13979e-55
	Gng11	4.66197	7.14489e-58	1.3411e-54
	Nrp2	4.75518	1.30815e-57	2.26652e-54
	Pard6g	5.9434	4.06387e-57	6.53819e-54
	Thy1	8.46399	6.90647e-57	1.03708e-53
	Fgl2	5.89231	1.47641e-56	2.07842e-53
	Slc45a3	7.66578	1.72027e-55	2.27925e-52
	Lyve1	5.81061	4.19313e-55	5.12157e-52
	S100a16	4.05221	4.32028e-55	5.12157e-52
	Nfat5	3.3905	1.56038e-54	1.7573e-51
19	Ighm	9.4656	1.36083e-61	3.06514e-57
	Cd37	5.52692	4.61196e-57	5.19399e-53
	Ptprcap	7.51101	8.75018e-57	6.56963e-53
	Cd79a	12.1799	2.37316e-55	1.33632e-51
	Ebf1	6.24061	4.9715e-54	2.23956e-50
	Mzb1	10.9119	6.4686e-53	2.42831e-49
	Cd79b	6.81961	1.51435e-52	4.87276e-49
	Igkc	13.5411	8.85529e-52	2.49321e-48
	Ly6d	13.3878	2.49041e-48	6.23266e-45
	Vpreb3	10.9564	3.43946e-48	7.74704e-45
	Cd74	6.56629	4.79297e-41	9.81427e-38
	Ly6e	2.85475	5.57852e-40	1.04709e-36
	Ms4a1	13.5837	1.16136e-37	2.01218e-34
	Plac8	4.37889	1.72087e-37	2.76863e-34
	H3f3a	1.3203	1.92646e-34	2.89278e-31
	Rps13	0.939122	1.71861e-32	2.15055e-29
	Ltb	5.60941	3.298e-32	3.90969e-29
	Limd2	2.78594	4.64365e-32	5.22967e-29
	Rac2	2.3908	7.94496e-30	8.1342e-27
	Cd52	3.11037	1.93536e-29	1.89531e-26
20	Myl7	11.8524	3.62075e-44	8.15537e-40
	Myl4	11.112	8.22974e-43	7.22969e-39
	Actc1	10.7739	9.62931e-43	7.22969e-39
	Tpm1	5.97196	2.61295e-41	1.47135e-37
	Tnnt2	9.89779	3.69315e-40	1.66369e-36
	Tnnc1	11.1027	1.45434e-36	5.45958e-33
	Slc25a4	4.41725	1.88055e-35	6.05109e-32
	Ckm	10.9199	2.19971e-35	6.05419e-32
	Cryab	5.60399	2.4191e-35	6.05419e-32
	Fabp3	9.26212	4.43607e-35	9.99181e-32
	Myh6	10.9804	3.34454e-34	6.84841e-31
	Tnni3	10.5295	5.57072e-33	1.04562e-29
	Sln	11.6778	5.06717e-32	8.77946e-29
	Cox6c	2.03367	1.15546e-31	1.85897e-28
	Csrp3	10.968	7.35146e-30	1.10389e-26
	Tnni1	9.70218	1.22777e-29	1.72839e-26
	Chchd10	4.58857	1.02065e-28	1.27717e-25
	Pgam2	8.1032	3.05183e-26	3.61786e-23
	Aldoa	2.23558	8.00922e-26	9.01998e-23
	Cox6a2	9.78851	1.28382e-25	1.373e-22
