# Supplementary material for: ZSWIM8 destabilizes many murine microRNAs and is required for proper embryonic growth and development
Source: Genome Res. 2023 Sep;33(9):1482–96. doi: 10.1101/gr.278073.123 (PMC10620050; doi:10.1101/gr.278073.123)
Supplement: Supplement 4 [file Supplemental_Table_S3.xlsx]

## Sheet: Sheet1
Oligonucleotides used in this study.
CRISPR
Name	Notes	Sequence
Zswim8 sgRNA 6	Used to generate Zswim8 knockout alleles. Targets exon 2.	GGAGCTGTCAGCAAAGCAGG
Genotyping
Name	Notes	Sequence
Zswim8 PCR Fwd	Used with Zswim8_PCR_Rev to amplify a region of Zswim8 from mouse gDNA. Expected wild-type amplicon is 997 bp.	agaatgcccatctcccctct
Zswim8 PCR Rev	Used with Zswim8_PCR_Fwd to amplify a region of Zswim8 from mouse gDNA. Expected wild-type amplicon is 997 bp. Also used as a primer for Sanger sequencing, which was used to detect mutations in exon 2 of Zswim8.	TGCCATTGGCTAGGCATGAA
sRNA sequencing
Name	Notes	Sequence
18 nt marker	Internal standard for ligation and size-selection	CAUCCAUCCUUGUCAAUC
32 nt marker	Internal standard for ligation and size-selection	GGCAUUAACGCGAACUCGGCCUACAAUAGUGA
5' adapter	RNA oligo	GUUCAGAGUUCUACAGUCCGACGAUCNNNN
3' adapter	Ordered from IDT as /5Phos/NNNNTCGTATGCCGTCTTCTGCTTG/3ddC/ and then adenylated the 5′ end	AppNNNNTCGTATGCCGTCTTCTGCTTGddC
RT/Small RNA Rev primer		CAAGCAGAAGACGGCATA
Small RNA Fwd primer	BBBBBB is 6-nt barcode	AATGATACGGCGACCACCGACAGGTTGGAATTCTCGGGTGCCAAGGAACTCCA GTCACBBBBBBATCCGACAGGTTCAGAGTTCTACAGTCCGA
